# Supplementary material for: Iron or boron-catalyzed C–H arylthiation of substituted phenols at room temperature
Source: Royal Society of Chemistry journal article supplement (doi:10.1039/c4cc03600j), 2014-01-01

## Supporting Information

### Iron or boron-catalyzed C-H arylthiation of substituted phenols at room temperature

Hua Tian,<sup>a,b</sup> Changjin Zhu,<sup>a</sup> Haijun Yang<sup>b</sup> and Hua Fu\*<sup>a,b</sup>

<sup>a</sup> Department of Applied Chemistry, Beijing Institute of Technology, Beijing 100081, P. R. China.

<sup>b</sup> Key Laboratory of Bioorganic Phosphorus Chemistry and Chemical Biology (Ministry of Education), Department of Chemistry, Tsinghua University, Beijing 100084, P. R. China.

Fax: (+86) 10-62781695; E-mail: fuhua@mail.tsinghua.edu.cn

#### Table of contents

|                                                                                                                          |     |
|--------------------------------------------------------------------------------------------------------------------------|-----|
| General experimental procedures                                                                                          | P2  |
| Optimization of conditions on reaction of phenol ( <b>1a</b> ) with<br>1-(phenylthio)pyrrolidine-2,5-dione ( <b>2a</b> ) | P2  |
| General procedure for synthesis of <b>3a-b'</b>                                                                          | P4  |
| Characterization data of compounds <b>3a-b'</b>                                                                          | P4  |
| Synthesis of <i>N</i> -(4-hydroxy-3-(phenylthio)phenyl)acetamide ( <b>3c'</b> )                                          | P13 |
| Synthesis of 7-hydroxy-6,8-bis( <i>p</i> -tolylthio)-2 <i>H</i> -chromen-2-one ( <b>3d'</b> )                            | P13 |
| Synthesis of 2-(4-hydroxy-3-(phenylthio)phenyl)-4 <i>H</i> -chromen-4-one ( <b>3e'</b> )                                 | P14 |
| References                                                                                                               | P14 |
| The <sup>1</sup> H and <sup>13</sup> C NMR spectra of compounds <b>3a-e'</b>                                             | P16 |

## General experimental procedures

All reactions were carried out at room temperature and monitored by TLC. Proton and carbon magnetic resonance spectra ( $^1\text{H}$  NMR and  $^{13}\text{C}$  NMR) were recorded using tetramethylsilane (TMS) in the solvent of  $\text{CDCl}_3$  as the internal standard ( $^1\text{H}$  NMR: TMS at 0.00 ppm,  $\text{CDCl}_3$  at 7.26 ppm;  $^{13}\text{C}$  NMR:  $\text{CDCl}_3$  at 77.16 ppm) and using tetramethylsilane (TMS) in the solvent of  $\text{DMSO-}d_6$  as the internal standard ( $^1\text{H}$  NMR:  $\text{DMSO-}d_6$  at 2.50 ppm;  $^{13}\text{C}$  NMR:  $\text{DMSO-}d_6$  at 39.52 ppm).

## Optimization of conditions on reaction of phenol (1a) with 1-(phenylthio)pyrrolidine-2,5-dione (2a)

**Table 1** Optimization of conditions on reaction of phenol (1a) with 1-(phenylthio)pyrrolidine-2,5-dione (2a) leading to 4-(phenylthio)phenol (3a)<sup>a</sup>

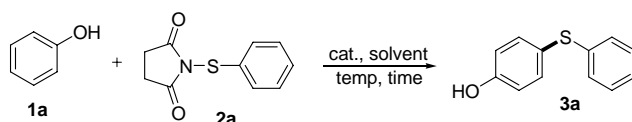

| Entry | Cat. (equiv)                                 | Solvent                  | Temp ( $^{\circ}\text{C}$ ) | Time   | Yield (%) <sup>b</sup> |
|-------|----------------------------------------------|--------------------------|-----------------------------|--------|------------------------|
| 1     | $\text{FeCl}_3$ (0.2)                        | DCE                      | RT                          | 10 min | 94                     |
| 2     | $\text{BF}_3 \cdot \text{OEt}_2$ (0.2)       | DCE                      | RT                          | 10 min | 92                     |
| 3     | $\text{CuI}$ (0.2)                           | DCE                      | RT                          | 10 min | 0                      |
| 4     | $\text{CuCl}_2$ (0.2)                        | DCE                      | RT                          | 10 min | 0                      |
| 5     | $\text{Pd}(\text{OAc})_2$ (0.2)              | DCE                      | RT                          | 10 min | 0                      |
| 6     | $\text{AgOAc}$ (0.2)                         | DCE                      | RT                          | 10 min | 0                      |
| 7     | $\text{RuCl}_3$ (0.2)                        | DCE                      | RT                          | 10 min | 0                      |
| 8     | $\text{ZnCl}_2$ (0.2)                        | DCE                      | RT                          | 10 min | 0                      |
| 9     | $\text{AlCl}_3$ (0.2)                        | DCE                      | RT                          | 10 min | 83                     |
| 10    | $\text{TsOH}$ (0.2)                          | DCE                      | RT                          | 10 min | 42                     |
| 11    | $\text{H}_2\text{SO}_4$ (0.2) <sup>[c]</sup> | DCE                      | RT                          | 10 min | 91                     |
| 12    | -                                            | DCE                      | RT to 100                   | 16 h   | 0                      |
| 13    | $\text{FeCl}_3$ (0.1)                        | DCE                      | RT                          | 3 h    | 93                     |
| 14    | $\text{BF}_3 \cdot \text{OEt}_2$ (0.1)       | DCE                      | RT                          | 3 h    | 92                     |
| 15    | $\text{FeCl}_3$ (0.05)                       | DCE                      | RT                          | 3 h    | 53                     |
| 16    | $\text{BF}_3 \cdot \text{OEt}_2$ (0.05)      | DCE                      | RT                          | 3 h    | 49                     |
| 17    | $\text{FeCl}_3$ (0.1)                        | $\text{CH}_2\text{Cl}_2$ | RT                          | 3 h    | 94                     |

|    |                                                      |                                 |    |     |    |
|----|------------------------------------------------------|---------------------------------|----|-----|----|
| 18 | BF <sub>3</sub> ·OEt <sub>2</sub> (0.1)              | CH <sub>2</sub> Cl <sub>2</sub> | RT | 3 h | 93 |
| 19 | FeCl <sub>3</sub> (0.1)                              | CHCl <sub>3</sub>               | RT | 3 h | 85 |
| 20 | BF <sub>3</sub> ·OEt <sub>2</sub> (0.1)              | CHCl <sub>3</sub>               | RT | 3 h | 82 |
| 21 | FeCl <sub>3</sub> (0.1)                              | MeCN                            | RT | 3 h | 64 |
| 22 | BF <sub>3</sub> ·OEt <sub>2</sub> (0.1)              | MeCN                            | RT | 3 h | 90 |
| 23 | FeCl <sub>3</sub> (0.1)                              | THF                             | RT | 3 h | 52 |
| 24 | BF <sub>3</sub> ·OEt <sub>2</sub> (0.1)              | THF                             | RT | 3 h | 0  |
| 25 | FeCl <sub>3</sub> (0.1)                              | DCE                             | 50 | 3 h | 64 |
| 26 | BF <sub>3</sub> ·OEt <sub>2</sub> (0.1)              | DCE                             | 50 | 3 h | 62 |
| 27 | FeCl <sub>3</sub> (0.1)<br>+ CuCl <sub>2</sub> (0.1) | CH <sub>2</sub> Cl <sub>2</sub> | RT | 3 h | 94 |

<sup>a</sup> Reaction conditions: phenol (**1a**) (0.3 mmol), 1-(phenylthio)pyrrolidine-2,5-dione (**2a**) (0.33 mmol), catalyst (0.015-0.06 mmol), anhydrous solvent (2 mL), temperature (RT - 100 °C), reaction time (10 min - 16 h). <sup>b</sup> Isolated yield. <sup>c</sup> 98% H<sub>2</sub>SO<sub>4</sub>. DCE = 1,2-dichloroethane.

As shown in Table 1, our search for optimized reaction conditions began by treating phenol (**1a**) with 1-(phenylthio)pyrrolidine-2,5-dione (**2a**) in the presence of different catalysts in dichloroethane (DCE) at room temperature (entries 1-11), and FeCl<sub>3</sub> (entry 1), BF<sub>3</sub>·OEt<sub>2</sub> (entry 2), AlCl<sub>3</sub> (entry 9) and H<sub>2</sub>SO<sub>4</sub> (entry 11) gave the higher yields, in which FeCl<sub>3</sub> and BF<sub>3</sub>·OEt<sub>2</sub> were most efficient (*the two catalysts showed similar catalytic activity*) (entries 1 and 2). No target product was observed in the absence of catalyst when temperature was changed from room temperature to 100 °C (entry 12). Amount of the catalysts were reduced, and 0.1 equiv of catalysts provided similar yields (entries 13 and 14), but 0.05 equiv of catalysts gave lower yields (entries 15 and 16). Other solvents were attempted (entries 17-24), and CH<sub>2</sub>Cl<sub>2</sub> was a suitable solvent in this arylthiation of phenol (entries 17 and 18). When temperature was raised to 50 °C, yields decreased (entries 25 and 26). In order to check whether trace amount of copper involve in catalysis in the iron-catalyzed arylthiation of phenol, mixed catalysts (FeCl<sub>3</sub>/CuCl<sub>2</sub>) were used, and the result showed that addition of CuCl<sub>2</sub> did not affect this reaction (entry 27).

### General procedure for synthesis of 3a-b'

A 10 mL flask was charged with a magnetic stirrer, substituted phenol (**1**) (0.3 mmol) and 1-(substituted phenylthio)pyrrolidine-2,5-dione (**2**) (0.66 mmol for **3n**; 0.33 mmol for others) and dry dichloromethane (2.0 mL). FeCl<sub>3</sub> or BF<sub>3</sub>·OEt<sub>2</sub> (0.03 mmol) was added to the flask, and the mixture was stirred at room temperature till the reaction completed (TLC determination). The resulting solution was concentrated by a rotary evaporator, and the residue was purified by column chromatography on silica gel using petroleum ether/ethyl acetate or dichloromethane/hexane as the eluent to give the desired target product (**3**).

### Characterization data of compounds 3a-b'

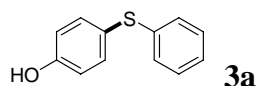

**4-(Phenylthio)phenol (3a).**<sup>1</sup> Eluent: petroleum ether/ethyl acetate (5:1). Yield: 56 mg (93%) using FeCl<sub>3</sub> as the catalyst; 55 mg (92%) using BF<sub>3</sub>·OEt<sub>2</sub> as the catalyst. Light yellow oil. <sup>1</sup>H NMR (CDCl<sub>3</sub>, 400 MHz) δ 7.35 (d, *J* = 8.7 Hz, 2H), 7.11 - 7.24 (m, 5H), 6.80 (d, *J* = 8.7 Hz, 2H), 5.34 (s, 1H). <sup>13</sup>C NMR (CDCl<sub>3</sub>, 100 MHz) δ 155.8, 138.4, 135.6, 129.1, 128.5, 126.0, 124.8, 116.7. EIMS: M<sup>+</sup> m/z 202.2.

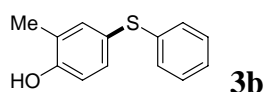

**2-Methyl-4-(phenylthio)phenol (3b).**<sup>2</sup> Eluent: petroleum ether/ethyl acetate (8:1). Yield: 58 mg (89%) using FeCl<sub>3</sub> as the catalyst; 56 mg (87%) using BF<sub>3</sub>·OEt<sub>2</sub> as the catalyst. Light brown oil. <sup>1</sup>H NMR (CDCl<sub>3</sub>, 400 MHz) δ 7.09 - 7.26 (m, 7H), 6.72 (d, *J* = 8.2 Hz, 1H), 5.17 (s, 1H), 2.20 (s, 3H). <sup>13</sup>C NMR (CDCl<sub>3</sub>, 100 MHz) δ 154.3, 138.7, 136.9, 133.2, 129.0, 128.2, 125.8, 125.4, 124.1, 116.1, 15.8. EIMS: M<sup>+</sup> m/z 216.2.

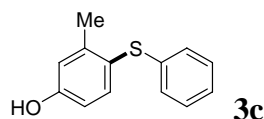

**2-Methyl-4-(phenylthio)phenol (3c).**<sup>2</sup> Eluent: petroleum ether/ethyl acetate

(8:1). Yield: 62 mg (95%) using FeCl<sub>3</sub> as the catalyst; 59 mg (92%) using BF<sub>3</sub>·OEt<sub>2</sub> as the catalyst. Light brown oil. <sup>1</sup>H NMR (CDCl<sub>3</sub>, 400 MHz) δ 7.37 (d, *J* = 8.2 Hz, 1H), 7.19 (t, *J* = 7.8 Hz, 2H), 7.09 (t, *J* = 7.8 Hz, 1H), 7.03 - 7.05 (m, 2H), 6.78 (d, *J* = 2.8 Hz, 1H), 6.67 (dd, *J* = 8.2 Hz, 2.8 Hz, 1H), 5.49 (br.s, 1H), 2.30 (s, 3H). <sup>13</sup>C NMR (CDCl<sub>3</sub>, 100 MHz) δ 156.4, 144.2, 138.4, 137.6, 129.0, 127.1, 125.4, 123.0, 117.9, 114.1, 21.0. EIMS: M<sup>+</sup> m/z 216.2.

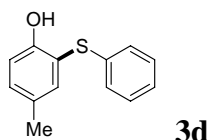

**4-Methyl-2-(phenylthio)phenol (3d).**<sup>1</sup> Eluent: dichloromethane/hexane (1:3). Yield: 52 mg (81%) using FeCl<sub>3</sub> as the catalyst; 52 mg (81%) using BF<sub>3</sub>·OEt<sub>2</sub> as the catalyst. Light yellow oil. <sup>1</sup>H NMR (CDCl<sub>3</sub>, 400 MHz) δ 7.32 (d, *J* = 1.8 Hz, 1H), 7.21 (t, *J* = 7.8 Hz, 2H), 7.11 - 7.17 (m, 2H), 7.07 (d, *J* = 7.8 Hz, 2H), 6.96 (d, *J* = 8.2 Hz, 1H), 6.34 (s, 1H), 2.27 (s, 3H). <sup>13</sup>C NMR (CDCl<sub>3</sub>, 100 MHz) δ 155.2, 137.0, 136.2, 133.1, 130.7, 129.3, 126.9, 126.1, 115.8, 115.4, 20.4. EIMS: M<sup>+</sup> m/z 216.2.

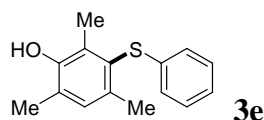

**2,4,6-Trimethyl-3-(phenylthio)phenol (3e).** Eluent: petroleum ether/ethyl acetate (10:1). Yield: 59 mg (81%) using FeCl<sub>3</sub> as the catalyst; 58 mg (79%) using BF<sub>3</sub>·OEt<sub>2</sub> as the catalyst. Light brown oil. <sup>1</sup>H NMR (CDCl<sub>3</sub>, 400 MHz) δ 7.15 (t, *J* = 7.3 Hz, 2H), 7.03 (t, *J* = 7.3 Hz, 1H), 6.97 (s, 1H), 6.90 - 6.92 (m, 2H), 4.61 (br.s, 1H), 2.36 (s, 3H), 2.32 (s, 3H), 2.26 (s, 3H). <sup>13</sup>C NMR (CDCl<sub>3</sub>, 100 MHz) δ 150.8, 138.5, 135.6, 130.2, 129.0, 128.6, 125.6, 124.9, 124.7, 21.3, 16.2, 14.4. EIMS: M<sup>+</sup> m/z 244.1.

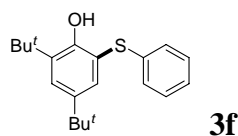

**2,4-Di-tert-butyl-6-(phenylthio)phenol (3f).** Eluent: petroleum ether/ethyl acetate (10:1). Yield: 91 mg (97%) using FeCl<sub>3</sub> as the catalyst; 90 mg (96%)

using  $\text{BF}_3 \cdot \text{OEt}_2$  as the catalyst. White solid, mp 48 - 49 °C.  $^1\text{H}$  NMR ( $\text{CDCl}_3$ , 400 MHz)  $\delta$  7.41 - 7.42 (m, 2H), 7.21 (t,  $J = 7.8$  Hz, 2H), 7.11 (t,  $J = 6.9$  Hz, 1H), 7.04 (d,  $J = 7.8$  Hz, 2H), 6.86 (s, 1H), 1.42 (s, 9H), 1.30 (s, 9H).  $^{13}\text{C}$  NMR ( $\text{CDCl}_3$ , 100 MHz)  $\delta$  153.6, 142.9, 136.6, 135.9, 131.2, 129.3, 127.0, 126.5, 125.9, 115.8, 35.5, 34.5, 31.7, 29.6. EIMS:  $\text{M}^+$  m/z 314.4.

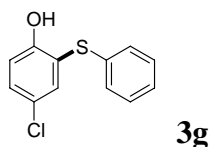

**4-Chloro-2-(phenylthio)phenol (3g).** Eluent: petroleum ether/ethyl acetate (4:1). Yield: 48 mg (68%) using  $\text{FeCl}_3$  as the catalyst; 46 mg (65%) using  $\text{BF}_3 \cdot \text{OEt}_2$  as the catalyst. Yellow oil.  $^1\text{H}$  NMR ( $\text{CDCl}_3$ , 400 MHz)  $\delta$  7.51 (d,  $J = 2.3$  Hz, 1H), 7.31 (dd,  $J = 8.7$  Hz, 2.3 Hz, 1H), 7.26 (t,  $J = 7.3$  Hz, 2H), 7.18 (t,  $J = 7.3$  Hz, 1H), 7.11 (d,  $J = 7.3$  Hz, 2H), 7.00 (d,  $J = 8.7$  Hz, 1H), 6.45 (s, 1H).  $^{13}\text{C}$  NMR ( $\text{CDCl}_3$ , 100 MHz)  $\delta$  160.0, 135.8, 134.9, 132.2, 129.5, 127.6, 126.8, 125.6, 118.3, 116.9. EIMS:  $\text{M}^+$  m/z 236.1.

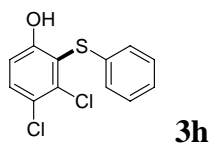

**3,4-Dichloro-2-(phenylthio)phenol (3h).** Eluent: dichloromethane/hexane (1:1). Yield: 45 mg (55%) using  $\text{FeCl}_3$  as the catalyst; 47 mg (58%) using  $\text{BF}_3 \cdot \text{OEt}_2$  as the catalyst. Brown oil.  $^1\text{H}$  NMR ( $\text{CDCl}_3$ , 400 MHz)  $\delta$  7.45 (d,  $J = 9.2$  Hz, 1H), 7.25 - 7.29 (m, 2H), 7.18 - 7.22 (m, 1H), 7.10 - 7.13 (m, 2H), 6.99 (d,  $J = 9.2$  Hz, 1H), 6.90 (s, 1H).  $^{13}\text{C}$  NMR ( $\text{CDCl}_3$ , 100 MHz)  $\delta$  157.4, 138.5, 133.4, 133.0, 129.6, 127.5, 127.0, 124.9, 118.4, 114.7. EIMS:  $\text{M}^+$  m/z 270.1.

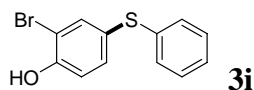

**2-Bromo-4-(phenylthio)phenol (3i).**<sup>1</sup> Eluent: petroleum ether/ethyl acetate (5:1). Yield: 65 mg (77%) using  $\text{FeCl}_3$  as the catalyst; 65 mg (77%) using  $\text{BF}_3 \cdot \text{OEt}_2$  as the catalyst. Brown oil.  $^1\text{H}$  NMR ( $\text{CDCl}_3$ , 400 MHz)  $\delta$  7.57 (d,  $J = 2.3$  Hz, 1H), 7.16 - 7.31 (m, 6H), 6.99 (d,  $J = 8.3$  Hz, 1H), 5.63 (br.s, 1H).  $^{13}\text{C}$

NMR (CDCl<sub>3</sub>, 100 MHz)  $\delta$  152.4, 137.3, 136.4, 134.4, 129.3, 129.3, 126.8, 126.6, 117.0, 110.8. EIMS: M<sup>+</sup> m/z 280.2.

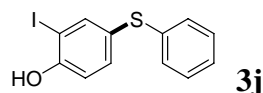

**2-Iodo-4-(phenylthio)phenol (3j).** Eluent: petroleum ether/ethyl acetate (5:1). Yield: 70 mg (71%) using FeCl<sub>3</sub> as the catalyst; 72 mg (73%) using BF<sub>3</sub>·OEt<sub>2</sub> as the catalyst. Brown oil. <sup>1</sup>H NMR (CDCl<sub>3</sub>, 400 MHz)  $\delta$  7.77 (d, *J* = 2.3 Hz, 1H), 7.33 (dd, *J* = 8.3 Hz, 2.3 Hz, 1H), 7.16 - 7.28 (m, 5H), 6.96 (d, *J* = 8.3 Hz, 1H), 5.43 (br.s, 1H). <sup>13</sup>C NMR (CDCl<sub>3</sub>, 100 MHz)  $\delta$  155.1, 142.6, 137.4, 135.5, 129.2, 129.1, 127.1, 126.5, 115.9, 86.3. EIMS: M<sup>+</sup> m/z 328.2.

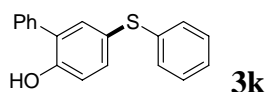

**5-(Phenylthio)biphenyl-2-ol (3k).** Eluent: petroleum ether/ethyl acetate (15:1). Yield: 70 mg (84%) using FeCl<sub>3</sub> as the catalyst; 71 mg (85%) using BF<sub>3</sub>·OEt<sub>2</sub> as the catalyst. Yellow oil. <sup>1</sup>H NMR (CDCl<sub>3</sub>, 400 MHz)  $\delta$  7.33 - 7.46 (m, 7H), 7.19 - 7.23 (m, 4H), 7.11 - 7.15 (m, 1H), 6.94 (d, *J* = 8.7 Hz, 1H), 5.40 (s, 1H). <sup>13</sup>C NMR (CDCl<sub>3</sub>, 100 MHz)  $\delta$  152.8, 138.3, 136.2, 135.7, 134.8, 129.5, 129.4, 129.1, 128.6, 128.3, 126.0, 124.9, 117.2. EIMS: M<sup>+</sup> m/z 278.3.

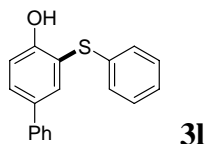

**3-(Phenylthio)biphenyl-4-ol (3l).** Eluent: dichloromethane/hexane (1:4). Yield: 57 mg (69%) using FeCl<sub>3</sub> as the catalyst; 56 mg (68%) using BF<sub>3</sub>·OEt<sub>2</sub> as the catalyst. White solid, mp 57 - 58 °C. <sup>1</sup>H NMR (CDCl<sub>3</sub>, 400 MHz)  $\delta$  7.78 (d, *J* = 2.3 Hz, 1H), 7.60 (dd, *J* = 8.7 Hz, 2.3 Hz, 1H), 7.51 - 7.54 (m, 2H), 7.39 (t, *J* = 7.8 Hz, 2H), 7.29 (t, *J* = 7.8 Hz, 1H), 7.22 (t, *J* = 7.3 Hz, 2H), 7.11 - 7.15 (m, 4H), 6.53 (s, 1H). <sup>13</sup>C NMR (CDCl<sub>3</sub>, 100 MHz)  $\delta$  156.8, 139.9, 135.8, 135.4, 134.8, 131.1, 129.4, 129.0, 127.2, 127.1, 126.8, 126.4, 116.9, 116.0. EIMS: M<sup>+</sup> m/z 278.3.

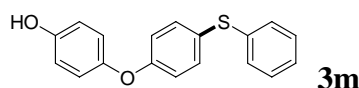

**4-(4-(Phenylthio)phenoxy)phenol (3m).** Eluent: dichloromethane/hexane (1:4). Yield: 58 mg (66%) using FeCl<sub>3</sub> as the catalyst; 57 mg (65%) using BF<sub>3</sub>·OEt<sub>2</sub> as the catalyst. White solid, mp 56 - 57 °C. <sup>1</sup>H NMR (CDCl<sub>3</sub>, 400 MHz) δ 7.36 (d, *J* = 8.7 Hz, 2H), 7.22 - 7.31 (m, 4H), 7.15 - 7.19 (m, 1H), 6.94 (d, *J* = 8.7 Hz, 2H), 6.89 (d, *J* = 8.7 Hz, 2H), 6.82 (d, *J* = 8.7 Hz, 2H), 4.91 (br.s, 1H). <sup>13</sup>C NMR (CDCl<sub>3</sub>, 100 MHz) δ 158.7, 152.2, 149.7, 137.7, 134.6, 129.3, 129.2, 127.2, 126.4, 121.5, 118.3, 116.6. EIMS: M<sup>+</sup> m/z 294.2.

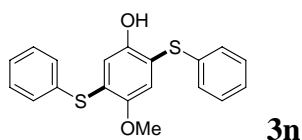

**4-Methoxy-2,5-bis(phenylthio)phenol (3n).** Eluent: petroleum ether/ethyl acetate (15:1). Yield: 93 mg (91%) using FeCl<sub>3</sub> as the catalyst; 97 mg (95%) using BF<sub>3</sub>·OEt<sub>2</sub> as the catalyst. Yellow oil. <sup>1</sup>H NMR (CDCl<sub>3</sub>, 400 MHz) δ 7.53 - 7.55 (m, 2H), 7.38 - 7.43 (m, 3H), 7.21 - 7.25 (m, 2H), 7.12 - 7.16 (m, 1H), 7.05 - 7.08 (m, 2H), 6.97 (s, 1H), 6.48 (s, 1H), 6.05 (s, 1H), 3.84 (s, 3H). <sup>13</sup>C NMR (CDCl<sub>3</sub>, 100 MHz) δ 152.0, 149.7, 136.1, 135.0, 133.1, 131.0, 129.8, 129.4, 129.1, 126.6, 126.2, 117.5, 114.3, 112.2, 56.7. EIMS: M<sup>+</sup> m/z 340.2.

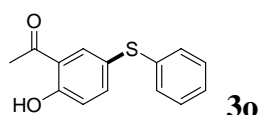

**1-(2-Hydroxy-5-(phenylthio)phenyl)ethanone (3o).** Eluent: petroleum ether/ethyl acetate (7:1). Yield: 45 mg (62%) using FeCl<sub>3</sub> as the catalyst; 49 mg (67%) using BF<sub>3</sub>·OEt<sub>2</sub> as the catalyst. Yellow oil. <sup>1</sup>H NMR (CDCl<sub>3</sub>, 400 MHz) δ 12.4 (s, 1H), 7.89 (d, *J* = 1.8 Hz, 1H), 7.55 (dd, *J* = 8.7 Hz, 1.8 Hz, 1H), 7.25 - 7.29 (m, 2H), 7.17 - 7.20 (m, 3H), 6.99 (d, *J* = 8.7 Hz, 1H), 2.60 (s, 3H). <sup>13</sup>C NMR (CDCl<sub>3</sub>, 100 MHz) δ 204.3, 162.7, 142.1, 137.7, 136.4, 129.3, 128.6, 126.4, 123.2, 120.5, 120.1, 26.8. EIMS: M<sup>+</sup> m/z 244.2.

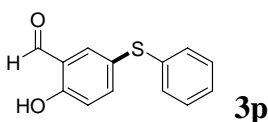



**2-Hydroxy-5-(phenylthio)benzaldehyde (3p).** Eluent: petroleum ether/ethyl acetate (7:1). Yield: 40 mg (58%) using FeCl<sub>3</sub> as the catalyst; 37 mg (54%) using BF<sub>3</sub>·OEt<sub>2</sub> as the catalyst. Yellow solid, mp 45 - 46 °C. <sup>1</sup>H NMR (CDCl<sub>3</sub>, 400 MHz) δ 11.1 (s, 1H), 9.85 (s, 1H), 7.68 (d, *J* = 1.8 Hz, 1H), 7.60 (dd, *J* = 8.7 Hz, 1.8 Hz, 1H), 7.19 - 7.30 (m, 5H), 6.99 (d, *J* = 8.7 Hz, 1H). <sup>13</sup>C NMR (CDCl<sub>3</sub>, 100 MHz) δ 196.2, 161.7, 142.1, 138.5, 137.1, 129.4, 129.3, 126.7, 125.1, 121.4, 119.3. EIMS: M<sup>+</sup> m/z 230.2.

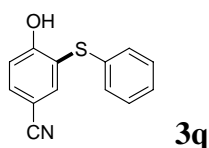

**4-Hydroxy-3-(phenylthio)benzonitrile (3q).** Eluent: dichloromethane/hexane (1:3). Yield: 35 mg (52%) using FeCl<sub>3</sub> as the catalyst; 36 mg (53%) using BF<sub>3</sub>·OEt<sub>2</sub> as the catalyst. Yellow solid, mp 104 - 105 °C. <sup>1</sup>H NMR (CDCl<sub>3</sub>, 400 MHz) δ 7.82 (d, *J* = 2.3 Hz, 1H), 7.61 (dd, *J* = 8.7 Hz, 2.3 Hz, 1H), 7.21 - 7.31 (m, 3H), 7.09 - 7.15 (m, 3H), 7.02 - 7.04 (m, 1H). <sup>13</sup>C NMR (CDCl<sub>3</sub>, 100 MHz) δ 160.6, 140.5, 135.7, 133.8, 129.7, 128.3, 127.4, 119.6, 118.3, 116.7, 105.0. EIMS: M<sup>+</sup> m/z 227.2.

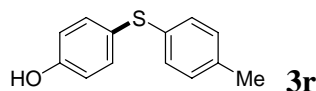

**4-(*p*-Tolylthio)phenol (3r).**<sup>3</sup> Eluent: petroleum ether/ethyl acetate (8:1). Yield: 59 mg (91%) using FeCl<sub>3</sub> as the catalyst; 58 mg (90%) using BF<sub>3</sub>·OEt<sub>2</sub> as the catalyst. White solid, mp 66 - 67 °C (lit.<sup>3</sup> 64 °C). <sup>1</sup>H NMR (CDCl<sub>3</sub>, 400 MHz) δ 7.29 (d, *J* = 8.7 Hz, 2H), 7.13 (d, *J* = 8.2 Hz, 2H), 7.06 (d, *J* = 8.2 Hz, 2H), 6.77 (d, *J* = 8.7 Hz, 2H), 5.21 (s, 1H), 2.29 (s, 3H). <sup>13</sup>C NMR (CDCl<sub>3</sub>, 100 MHz) δ 155.4, 136.4, 134.5, 134.1, 129.9, 129.6, 126.1, 116.5, 21.1. EIMS: M<sup>+</sup> m/z 216.0.

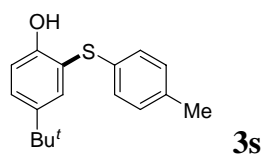

**4-*tert*-Butyl-2-(*p*-tolylthio)phenol (3s).** Eluent: petroleum ether/ethyl acetate

(15:1). Yield: 73 mg (90%) using FeCl<sub>3</sub> as the catalyst; 73 mg (90%) using BF<sub>3</sub>·OEt<sub>2</sub> as the catalyst. Yellow oil. <sup>1</sup>H NMR (CDCl<sub>3</sub>, 400 MHz) δ 7.52 (d, *J* = 2.3 Hz, 1H), 7.37 (dd, *J* = 8.7 Hz, 2.3 Hz, 1H), 6.97 - 7.04 (m, 5H), 6.35 (s, 1H), 2.26 (s, 3H), 1.29 (s, 9H). <sup>13</sup>C NMR (CDCl<sub>3</sub>, 100 MHz) δ 155.0, 144.2, 136.1, 133.5, 132.6, 130.1, 129.4, 127.1, 116.1, 115.0, 34.3, 31.6, 21.0. EIMS: M<sup>+</sup> m/z 272.3.

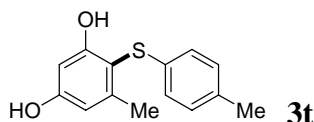

**5-Methyl-4-(*p*-tolylthio)benzene-1,3-diol (3t).** Eluent: petroleum ether/ethyl acetate (5:1). Yield: 68 mg (93%) using FeCl<sub>3</sub> as the catalyst; 67 mg (91%) using BF<sub>3</sub>·OEt<sub>2</sub> as the catalyst. Gray solid, mp 75 - 76 °C. <sup>1</sup>H NMR (CDCl<sub>3</sub>, 400 MHz) δ 7.03 (d, *J* = 7.8 Hz, 2H), 6.98 (s, 1H), 6.92 (d, *J* = 7.8 Hz, 2H), 6.46 (d, *J* = 2.3 Hz, 1H), 6.41 (d, *J* = 2.3 Hz, 1H), 5.68 (br.s, 1H), 2.32 (s, 3H), 2.27 (s, 3H). <sup>13</sup>C NMR (CDCl<sub>3</sub>, 100 MHz) δ 158.9, 158.2, 145.9, 135.8, 132.3, 130.1, 126.1, 110.4, 107.8, 99.8, 21.2, 21.0. EIMS: M<sup>+</sup> m/z 246.2.

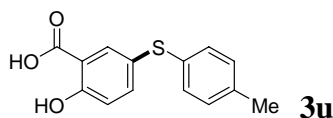

**2-Hydroxy-5-(*p*-tolylthio)benzoic acid (3u).** Eluent: dichloromethane/hexane/AcOH (1:1:0.001). Yield: 52 mg (67%) using FeCl<sub>3</sub> as the catalyst; 51 mg (65%) using BF<sub>3</sub>·OEt<sub>2</sub> as the catalyst. White solid, mp 247 - 248 °C. <sup>1</sup>H NMR (DMSO-*d*<sub>6</sub>, 400 MHz) δ 7.78 (d, *J* = 2.3 Hz, 1H), 7.46 (dd, *J* = 8.7 Hz, 2.3 Hz, 1H), 7.10 - 7.15 (m, 4H), 6.93 (d, *J* = 8.7 Hz, 1H), 2.25 (m, 3H). <sup>13</sup>C NMR (DMSO-*d*<sub>6</sub>, 100 MHz) δ 160.6, 140.5, 135.7, 133.8, 129.7, 128.3, 127.4, 119.6, 118.3, 116.7, 105.0. ESI-MS: [M-H]<sup>-</sup> m/z 259.1.

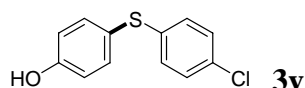

**4-(4-Chlorophenylthio)phenol (3v).**<sup>4</sup> Eluent: petroleum ether/ethyl acetate (8:1). Yield: 68 mg (96%) using FeCl<sub>3</sub> as the catalyst; 66 mg (93%) using BF<sub>3</sub>·OEt<sub>2</sub> as the catalyst. White solid, mp 32 - 33 °C. <sup>1</sup>H NMR (CDCl<sub>3</sub>, 400

MHz)  $\delta$  7.33 (d,  $J = 8.7$  Hz, 2H), 7.18 (d,  $J = 8.7$  Hz, 2H), 7.07 (d,  $J = 8.7$  Hz, 2H), 6.82 (d,  $J = 8.7$  Hz, 2H), 5.53 (s, 1H).  $^{13}\text{C}$  NMR ( $\text{CDCl}_3$ , 100 MHz)  $\delta$  156.1, 137.1, 135.7, 131.8, 129.6, 129.2, 124.3, 116.7. EIMS:  $\text{M}^+$   $m/z$  236.2.

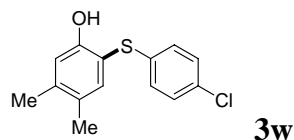

**2-(4-Chlorophenylthio)-4,5-dimethylphenol (3w).** Eluent: petroleum ether/ethyl acetate (15:1). Yield: 67 mg (84%) using  $\text{FeCl}_3$  as the catalyst; 68 mg (85%) using  $\text{BF}_3 \cdot \text{OEt}_2$  as the catalyst. White solid, mp 113 - 114 °C.  $^1\text{H}$  NMR ( $\text{CDCl}_3$ , 400 MHz)  $\delta$  7.23 (s, 1H), 7.16 (d,  $J = 8.2$  Hz, 2H), 6.97 (d,  $J = 8.2$  Hz, 2H), 6.87 (s, 1H), 6.19 (s, 1H), 2.25 (s, 3H), 2.17 (s, 3H).  $^{13}\text{C}$  NMR ( $\text{CDCl}_3$ , 100 MHz)  $\delta$  155.3, 142.1, 137.2, 135.3, 131.9, 129.9, 129.3, 127.9, 116.8, 112.1, 20.2, 18.8. EIMS:  $\text{M}^+$   $m/z$  264.0.

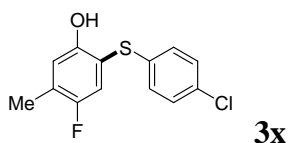

**2-(4-Chlorophenylthio)-4-fluoro-5-methylphenol (3x).** Eluent: petroleum ether/ethyl acetate (10:1). Yield: 55 mg (69%) using  $\text{FeCl}_3$  as the catalyst; 52 mg (65%) using  $\text{BF}_3 \cdot \text{OEt}_2$  as the catalyst. Yellow solid, mp 94 - 95 °C.  $^1\text{H}$  NMR ( $\text{CDCl}_3$ , 400 MHz)  $\delta$  7.21 (d,  $J = 8.7$  Hz, 2H), 7.15 (d,  $J = 8.7$  Hz, 1H), 7.01 (d,  $J = 8.7$  Hz, 2H), 6.89 (d,  $J = 6.4$  Hz, 1H), 6.15 (s, 1H), 2.28 (d,  $J = 1.8$  Hz, 3H).  $^{13}\text{C}$  NMR ( $\text{CDCl}_3$ , 100 MHz)  $\delta$  155.3 (d,  $J = 240.6$  Hz), 153.3, 134.2, 132.5, 130.2 (d,  $J = 19.2$  Hz), 129.5, 128.4, 121.8 (d,  $J = 24.0$  Hz), 117.8 (d,  $J = 4.8$  Hz), 113.4 (d,  $J = 7.7$  Hz), 15.1 (d,  $J = 2.9$  Hz). EIMS:  $\text{M}^+$   $m/z$  268.1.

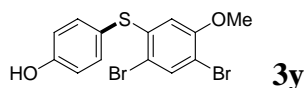

**4-(2,4-Dibromo-5-methoxyphenylthio)phenol (3y).** Eluent: petroleum ether/ethyl acetate (6:1). Yield: 96 mg (82%) using  $\text{FeCl}_3$  as the catalyst; 98 mg (84%) using  $\text{BF}_3 \cdot \text{OEt}_2$  as the catalyst. Yellow oil.  $^1\text{H}$  NMR ( $\text{CDCl}_3$ , 400 MHz)  $\delta$  7.63 (s, 1H), 7.42 (d,  $J = 8.7$  Hz, 2H), 6.91 (d,  $J = 8.7$  Hz, 2H), 6.22 (s, 1H),

5.53 (s, 1H), 3.55 (s, 3H).  $^{13}\text{C}$  NMR ( $\text{CDCl}_3$ , 100 MHz)  $\delta$  157.0, 155.5, 141.2, 137.2, 136.0, 122.2, 117.1, 111.6, 111.1, 108.7, 56.2. EIMS:  $\text{M}^+$   $m/z$  390.1.

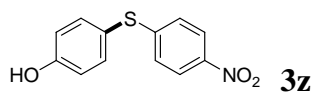

**4-(4-Nitrophenylthio)phenol (3z).**<sup>5</sup> Eluent: petroleum ether/ethyl acetate (4:1). Yield: 48 mg (65%) using  $\text{FeCl}_3$  as the catalyst; 47 mg (64%) using  $\text{BF}_3 \cdot \text{OEt}_2$  as the catalyst. Yellow solid, mp 153 - 154 °C (lit.<sup>5</sup> 150 - 151 °C).  $^1\text{H}$  NMR ( $\text{CDCl}_3$ , 400 MHz)  $\delta$  8.05 (d,  $J = 8.7$  Hz, 2H), 7.45 (d,  $J = 8.7$  Hz, 2H), 7.10 (d,  $J = 8.7$  Hz, 2H), 6.95 (d,  $J = 8.7$  Hz, 2H), 5.42 (s, 1H).  $^{13}\text{C}$  NMR ( $\text{CDCl}_3$ , 100 MHz)  $\delta$  157.5, 150.2, 145.1, 137.6, 125.7, 124.1, 120.5, 117.3. EIMS:  $\text{M}^+$   $m/z$  247.2.

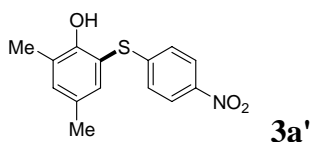

**2,4-Dimethyl-6-(4-nitrophenylthio)phenol (3a').** Eluent: petroleum ether/ethyl acetate (10:1). Yield: 44 mg (53%) using  $\text{FeCl}_3$  as the catalyst; 47 mg (57%) using  $\text{BF}_3 \cdot \text{OEt}_2$  as the catalyst. Yellow solid, mp 130 - 131 °C.  $^1\text{H}$  NMR ( $\text{CDCl}_3$ , 400 MHz)  $\delta$  8.07 (d,  $J = 8.7$  Hz, 2H), 7.10 - 7.15 (m, 4H), 6.15 (s, 1H), 2.29 (s, 3H), 2.28 (s, 3H).  $^{13}\text{C}$  NMR ( $\text{CDCl}_3$ , 100 MHz)  $\delta$  153.5, 146.4, 145.8, 135.6, 134.3, 130.8, 126.0, 125.6, 124.3, 112.5, 20.4, 16.6. EIMS:  $\text{M}^+$   $m/z$  275.2.

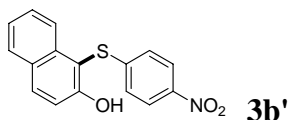

**1-(4-Nitrophenylthio)naphthalen-2-ol (3b').** Eluent: petroleum ether/ethyl acetate (10:1). Yield: 54 mg (61%) using  $\text{FeCl}_3$  as the catalyst; 53 mg (59%) using  $\text{BF}_3 \cdot \text{OEt}_2$  as the catalyst. Yellow solid, mp 184 - 185 °C.  $^1\text{H}$  NMR ( $\text{CDCl}_3$ , 400 MHz)  $\delta$  8.07 (d,  $J = 8.7$  Hz, 1H), 8.01 (d,  $J = 8.7$  Hz, 2H), 7.97 (d,  $J = 9.2$  Hz, 1H), 7.85 (d,  $J = 8.2$  Hz, 1H), 7.51 (t,  $J = 6.9$  Hz, 1H), 7.42 (t,  $J = 6.9$  Hz, 1H), 7.36 (d,  $J = 8.7$  Hz, 1H), 7.07 (d,  $J = 8.7$  Hz, 2H), 6.89 (br.s, 1H).  $^{13}\text{C}$  NMR ( $\text{CDCl}_3$ , 100 MHz)  $\delta$  157.4, 145.9, 145.2, 135.0, 134.0, 129.7, 129.0, 128.6, 126.1, 124.5, 124.4, 124.1, 117.3, 105.7. EIMS:  $\text{M}^+$   $m/z$  297.1.

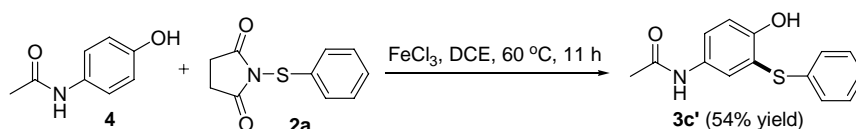

**Synthesis of *N*-(4-hydroxy-3-(phenylthio)phenyl)acetamide (**3c'**).** FeCl<sub>3</sub> (0.03 mmol, 5 mg), *N*-(4-hydroxyphenyl)acetamide (**4**) (0.3 mmol, 45 mg), 1-(phenylthio)pyrrolidine-2,5-dione (**2a**) (0.36 mmol, 1.2 equiv, 75 mg) and anhydrous dichloroethane (DCE) (2 mL) were added to a 25 mL Schlenk tube charged with a magnetic stirrer, and then the mixture was stirred at 60 °C for 11 h. After the reaction completed (TLC determination), the resulting solution was concentrated by a rotary evaporator, and the residue was purified by column chromatography on silica gel using petroleum ether/ethyl acetate (1 : 1) as the eluent to give *N*-(4-hydroxy-3-(phenylthio)phenyl)acetamide (**3c'**) (42mg, 54%) as a brown oil. <sup>1</sup>H NMR (CDCl<sub>3</sub>, 600 MHz) δ 7.65 (d, *J* = 2.8 Hz, 1H), 7.51 (dd, *J* = 8.6 Hz, 2.8 Hz, 1H), 7.24 (t, *J* = 7.6 Hz, 2H), 7.17 (t, *J* = 6.9 Hz, 1H), 7.12 (d, *J* = 8.3 Hz, 2H), 7.02 (d, *J* = 8.9 Hz, 1H), 6.42 (s, 1H), 2.14 (s, 3H). <sup>13</sup>C NMR (CDCl<sub>3</sub>, 75 MHz) δ 168.5, 154.2, 135.5, 131.3, 129.4, 128.4, 127.4, 126.5, 125.0, 116.9, 115.9, 24.4. EIMS: M<sup>+</sup> *m/z* 259.2.

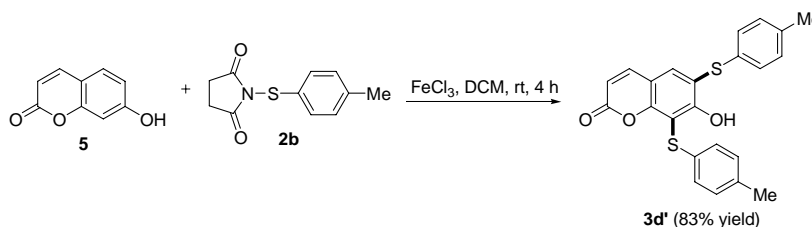

**Synthesis of 7-hydroxy-6,8-bis(*p*-tolylthio)-2*H*-chromen-2-one (**3d'**).** A 10 mL flask was charged with a magnetic stirrer, 7-hydroxy-2*H*-chromen-2-one (**5**) (0.3 mmol, 49 mg) and 1-(*p*-tolylthio)pyrrolidine-2,5-dione (**2b**) (0.66 mmol, 146 mg) and dry dichloromethane (DCM) (2.0 mL). FeCl<sub>3</sub> (0.03 mmol, 5 mg) was added to the flask, and the mixture was stirred at room temperature for 4 h. After the reaction completed (TLC determination), the resulting solution was concentrated by a rotary evaporator, and the residue was purified by column chromatography on silica gel using petroleum ether/ethyl acetate (5 : 1) as the eluent to give 7-hydroxy-6,8-bis(*p*-tolylthio)-2*H*-chromen-2-one (**3d'**) (101 mg,

83%) as a white solid, mp 179 - 180 °C. <sup>1</sup>H NMR (CDCl<sub>3</sub>, 400 MHz) δ 7.44 - 7.46 (m, 3H), 7.26 (d, *J* = 7.8 Hz, 2H), 7.04 (d, *J* = 8.2 Hz, 2H), 6.96 - 6.98 (m, 3H), 6.83 (s, 1H), 2.41 (s, 3H), 2.27 (s, 3H). <sup>13</sup>C NMR (CDCl<sub>3</sub>, 100 MHz) δ 158.9, 158.7, 154.8, 140.3, 137.1, 135.3, 134.5, 134.1, 131.3, 131.0, 130.3, 127.9, 127.4, 125.9, 115.5, 114.5, 103.2, 21.5, 21.1. ESI-MS: [M-H]<sup>-</sup> m/z 405.1.

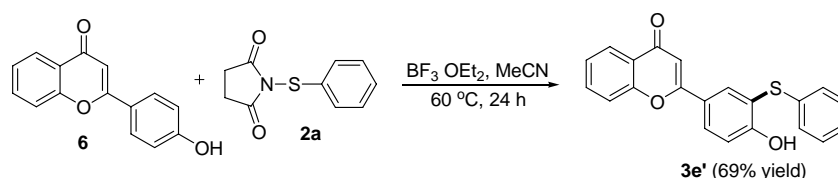

### Synthesis of 2-(4-hydroxy-3-(phenylthio)phenyl)-4*H*-chromen-4-one (**3e'**).

BF<sub>3</sub>·OEt<sub>2</sub> (0.03 mmol, 4 uL), 2-(4-hydroxyphenyl)-4*H*-chromen-4-one (**6**) (0.3 mmol, 71 mg), 1-(phenylthio)pyrrolidine-2,5-dione (**2a**) (0.36 mmol, 1.2 equiv, 75 mg) and anhydrous MeCN (2 mL) were added to a 25 mL Schlenk tube charged with a magnetic stirrer, and then the mixture was stirred at 60 °C for 24 h. After the reaction completed (TLC determination), the resulting solution was concentrated by a rotary evaporator, and the residue was purified by column chromatography on silica gel using dichloromethane/ methanol (40 : 1) as the eluent to give 2-(4-hydroxy-3-(phenylthio)phenyl)-4*H*-chromen-4-one (**3e'**) (72 mg, 69%) as a yellow solid, mp 235 - 236 °C. <sup>1</sup>H NMR (DMSO-*d*<sub>6</sub>, 400 MHz) δ 10.95 (br. s, 1H), 8.01 (d, *J* = 7.3 Hz, 1H), 7.96 (d, *J* = 8.2 Hz, 1H), 7.77 - 7.82 (m, 2H), 7.61 (d, *J* = 8.2 Hz, 1H), 7.46 (t, *J* = 6.9 Hz, 1H), 7.37 - 7.39 (m, 2H), 7.29 - 7.30 (m, 3H), 7.10 (d, *J* = 8.2 Hz, 1H), 6.79 (s, 1H). <sup>13</sup>C NMR (DMSO-*d*<sub>6</sub>, 100 MHz) δ 176.8, 162.2, 159.8, 155.5, 134.5, 134.1, 130.9, 129.7, 129.4, 128.1, 126.9, 125.4, 124.7, 123.2, 122.5, 121.0, 118.2, 116.2, 105.2. ESI-MS: [M+H]<sup>+</sup> m/z 347.3.

### References

- 1 C. D. Prasad, S. J. Balkrishan, A. Kumar, B. S. Bhakuni, K. Shrimali, S. Biswas and S. Kumar, *J. Org. Chem.* 2013, **78**, 1434.
- 2 K. Komeyama, K. Aihara, T. Kashihara and K. Takaki, *Chem. Lett.* 2011, **40**,

1254.

- 3 Y. -C. Wong, T. T. Jayanth and C. -H. Cheng, *Org. Lett.* 2006, **8**, 5614.
- 4 M. -T. Lan, W. - Y. Wu, S. -H, Huang, K. -L. Luo and F. -Y. Tsai, *RSC Adv.* 2011, **1**, 1751.
- 5 K. -M. Chen, Y. -W. Sun, Y. -W. Tang, Z. -Y. Sun and C. -H. Kwon, *Mol. Pharm.* 2005, **2**, 118.

# The $^1\text{H}$ and $^{13}\text{C}$ NMR spectra of compounds 3a-e'

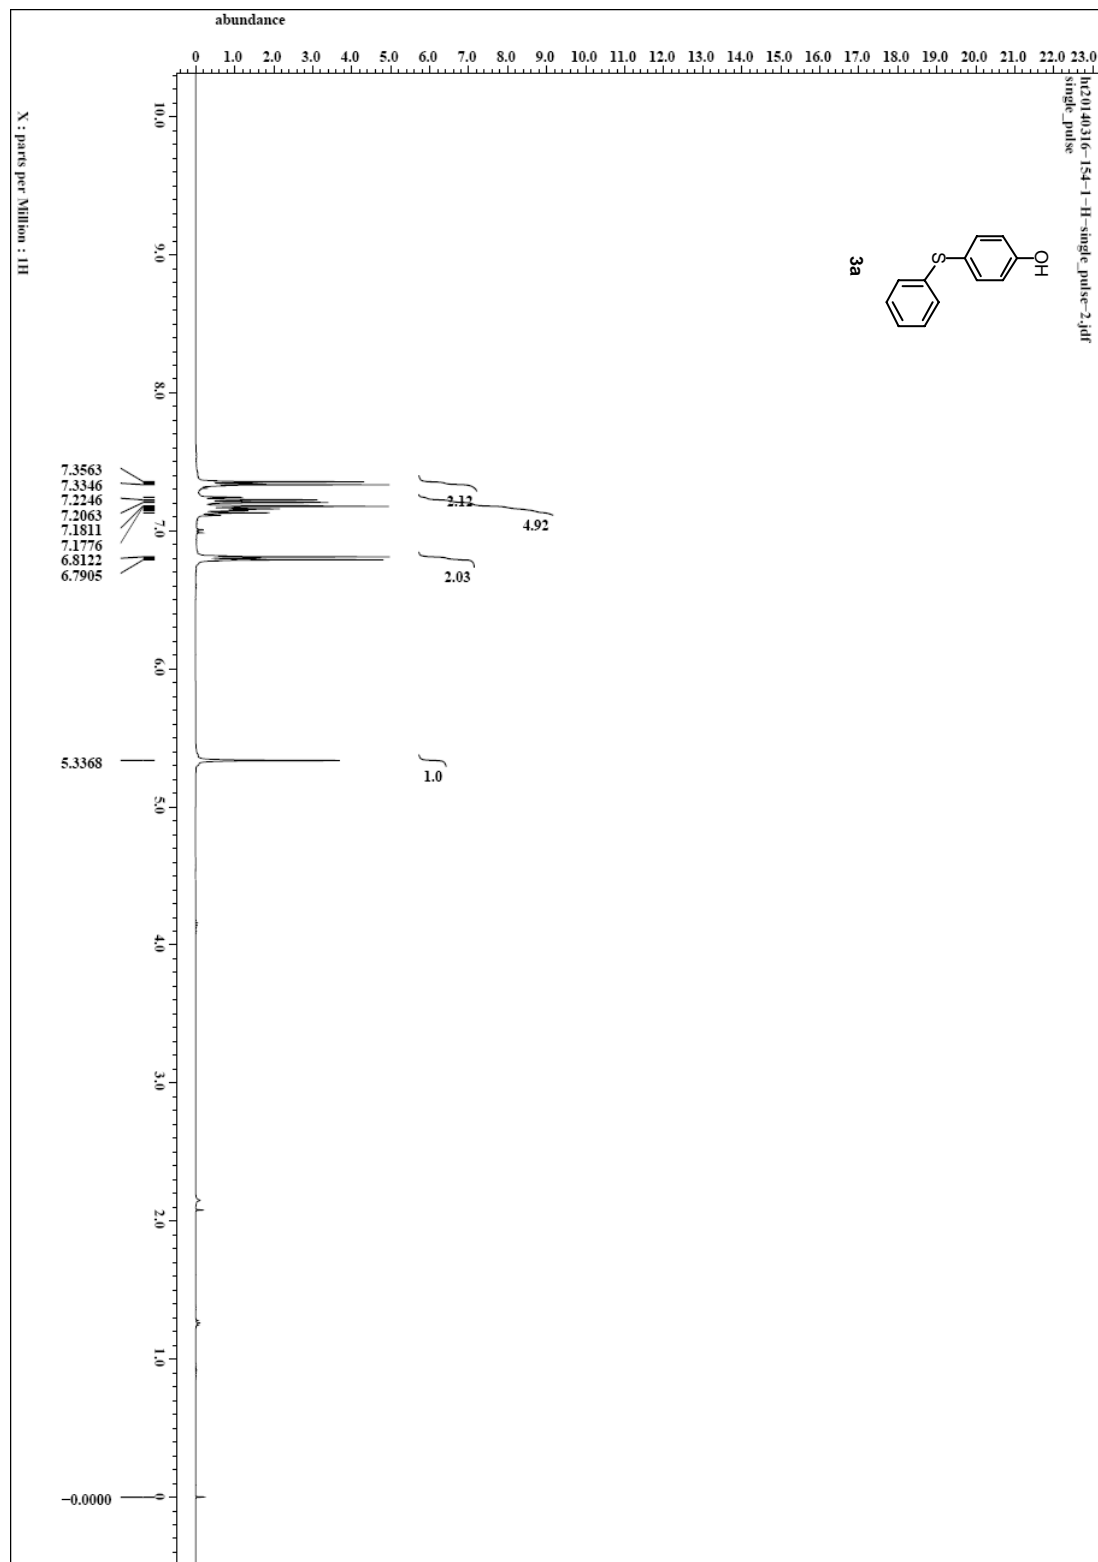



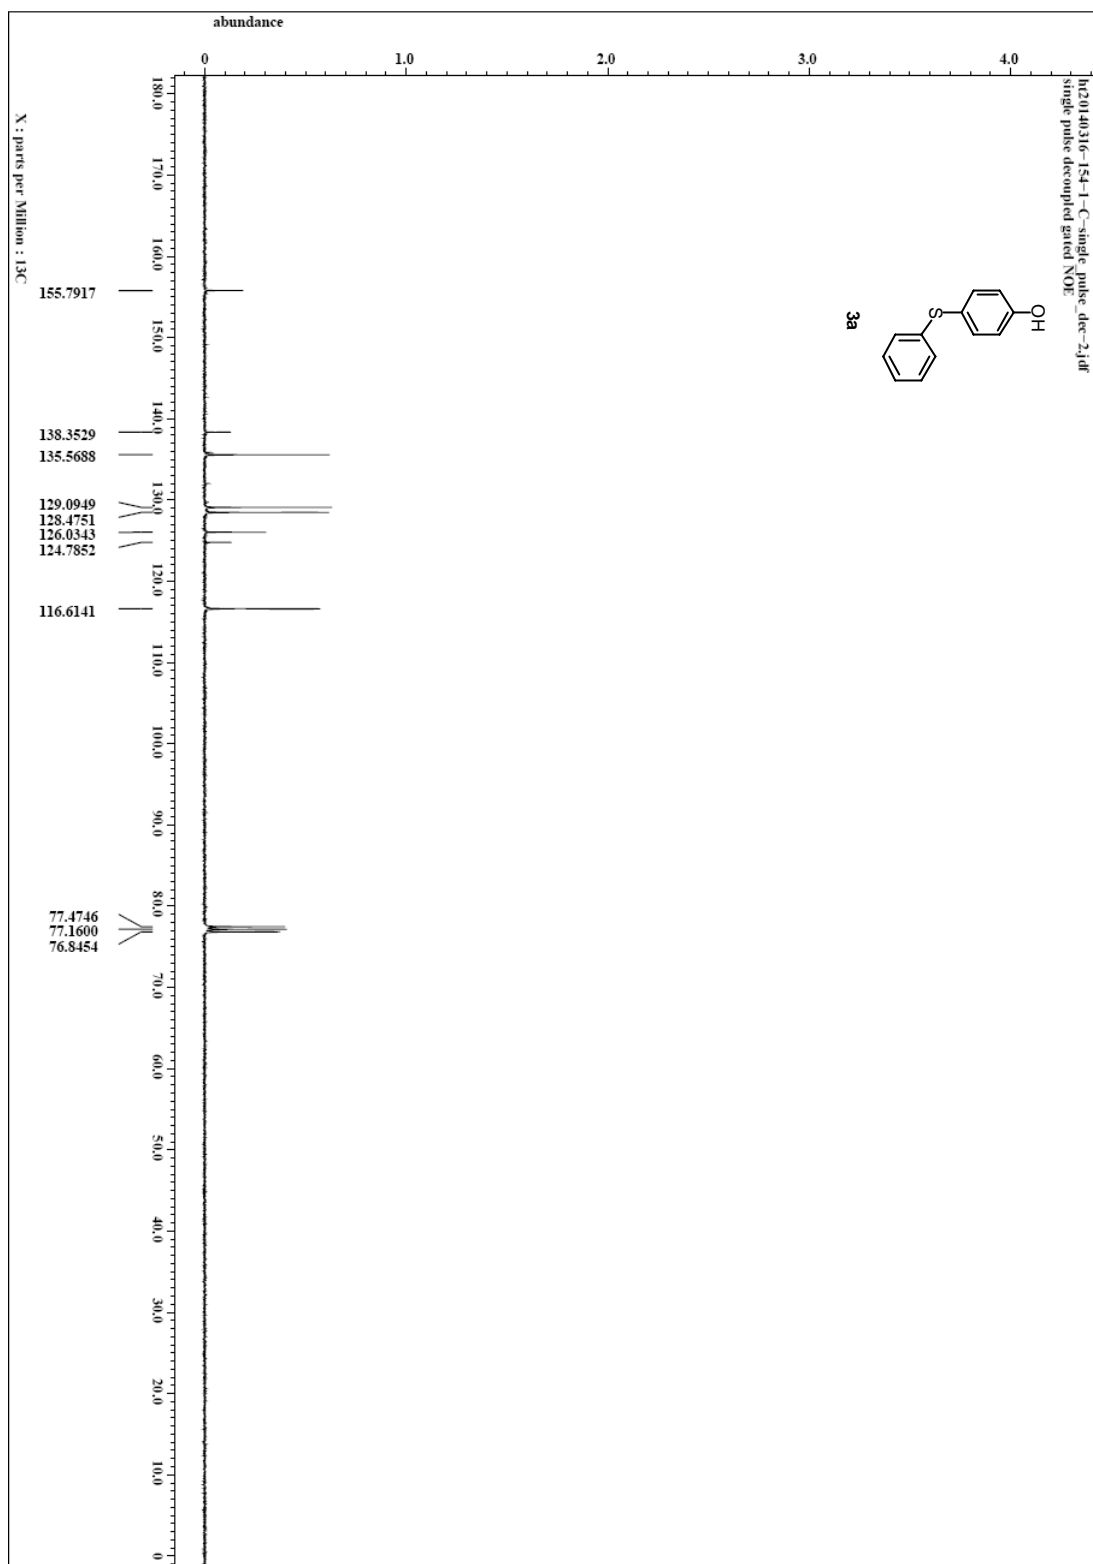

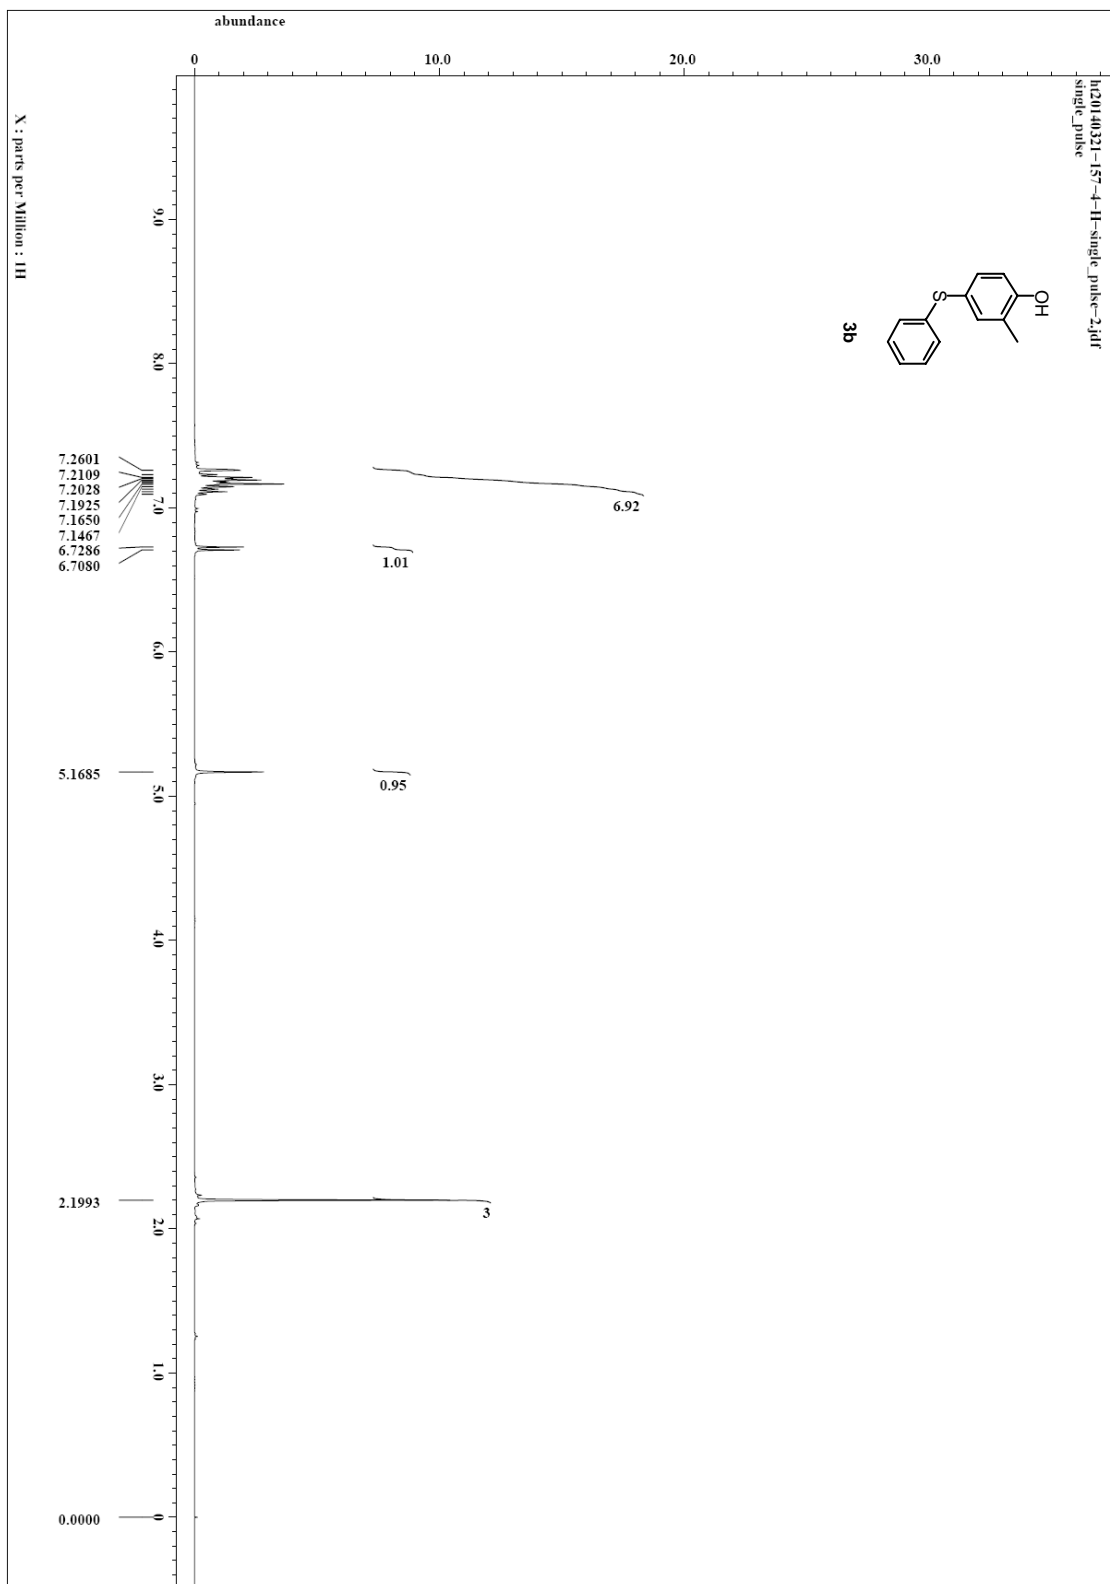

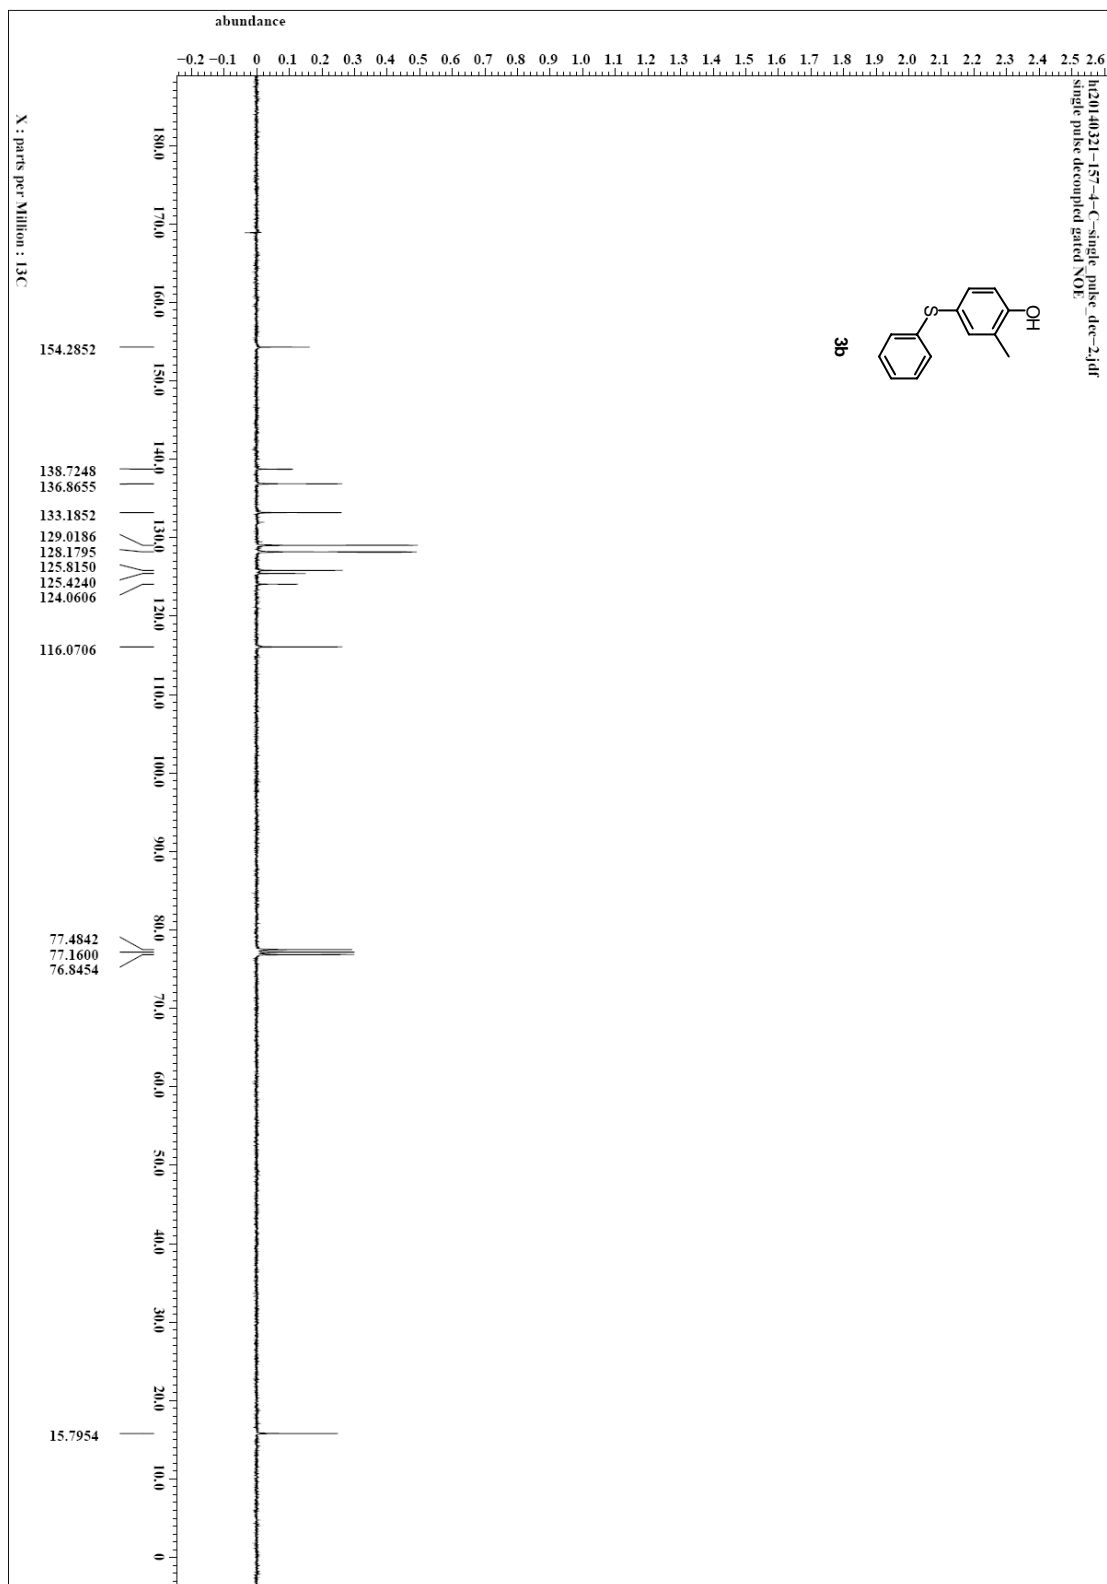

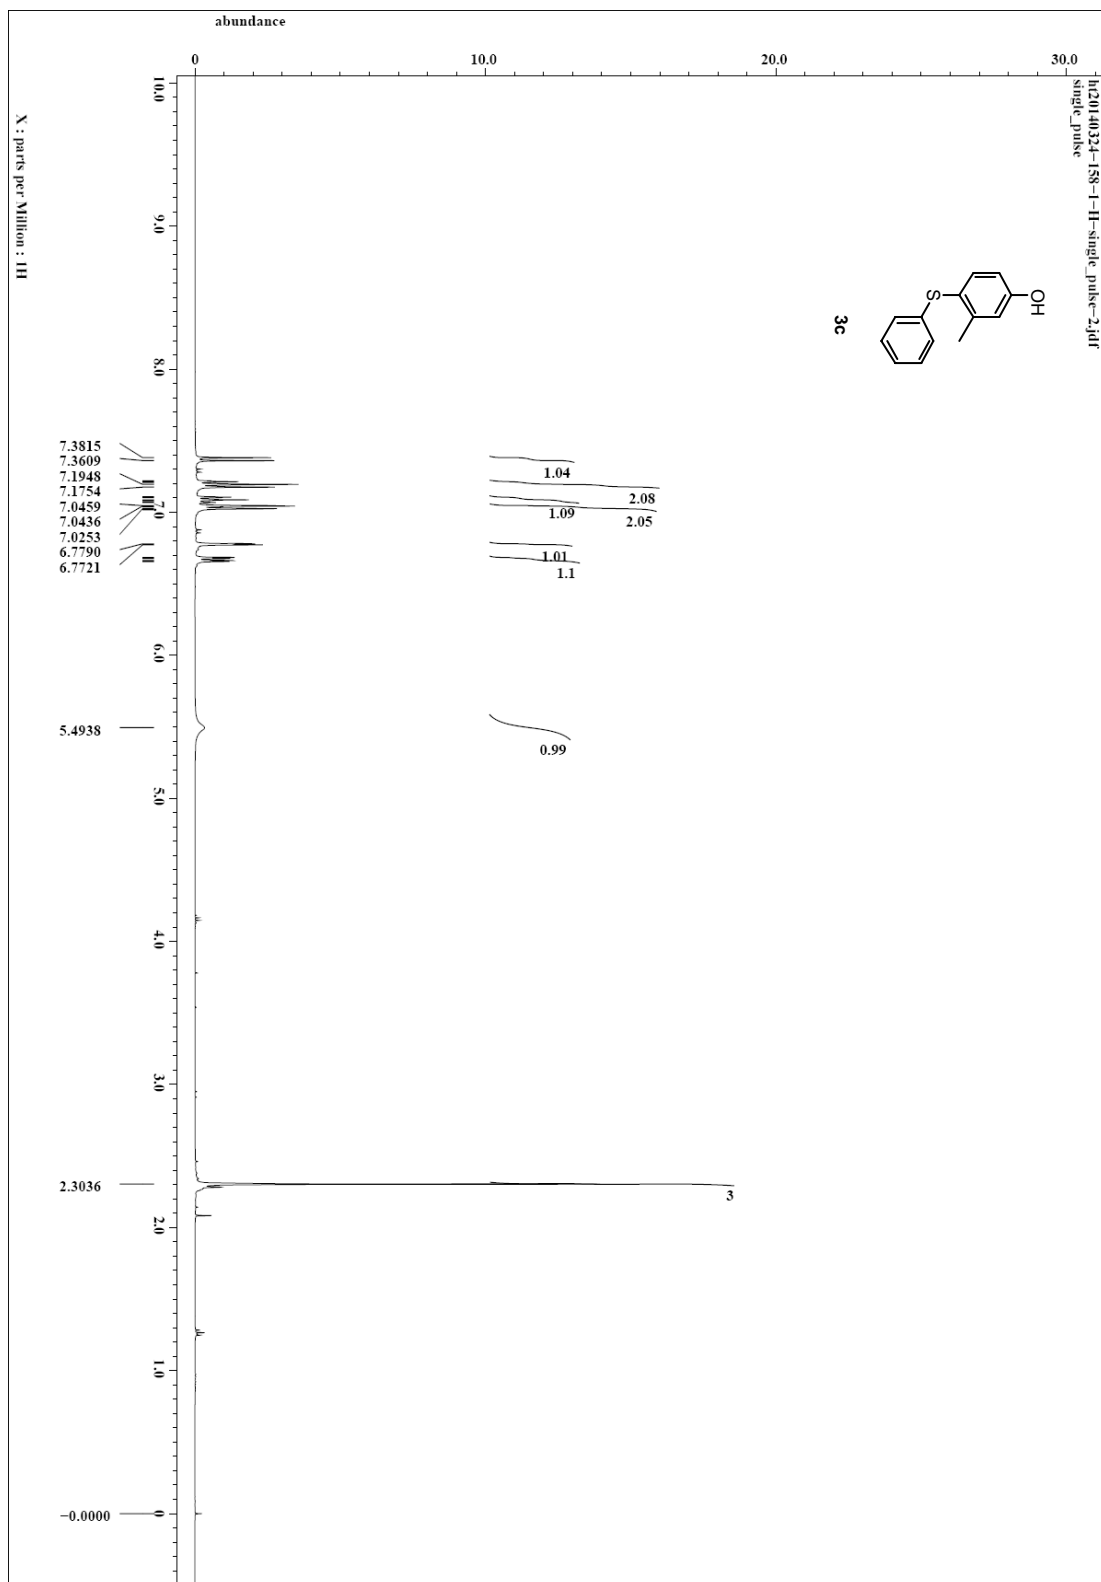

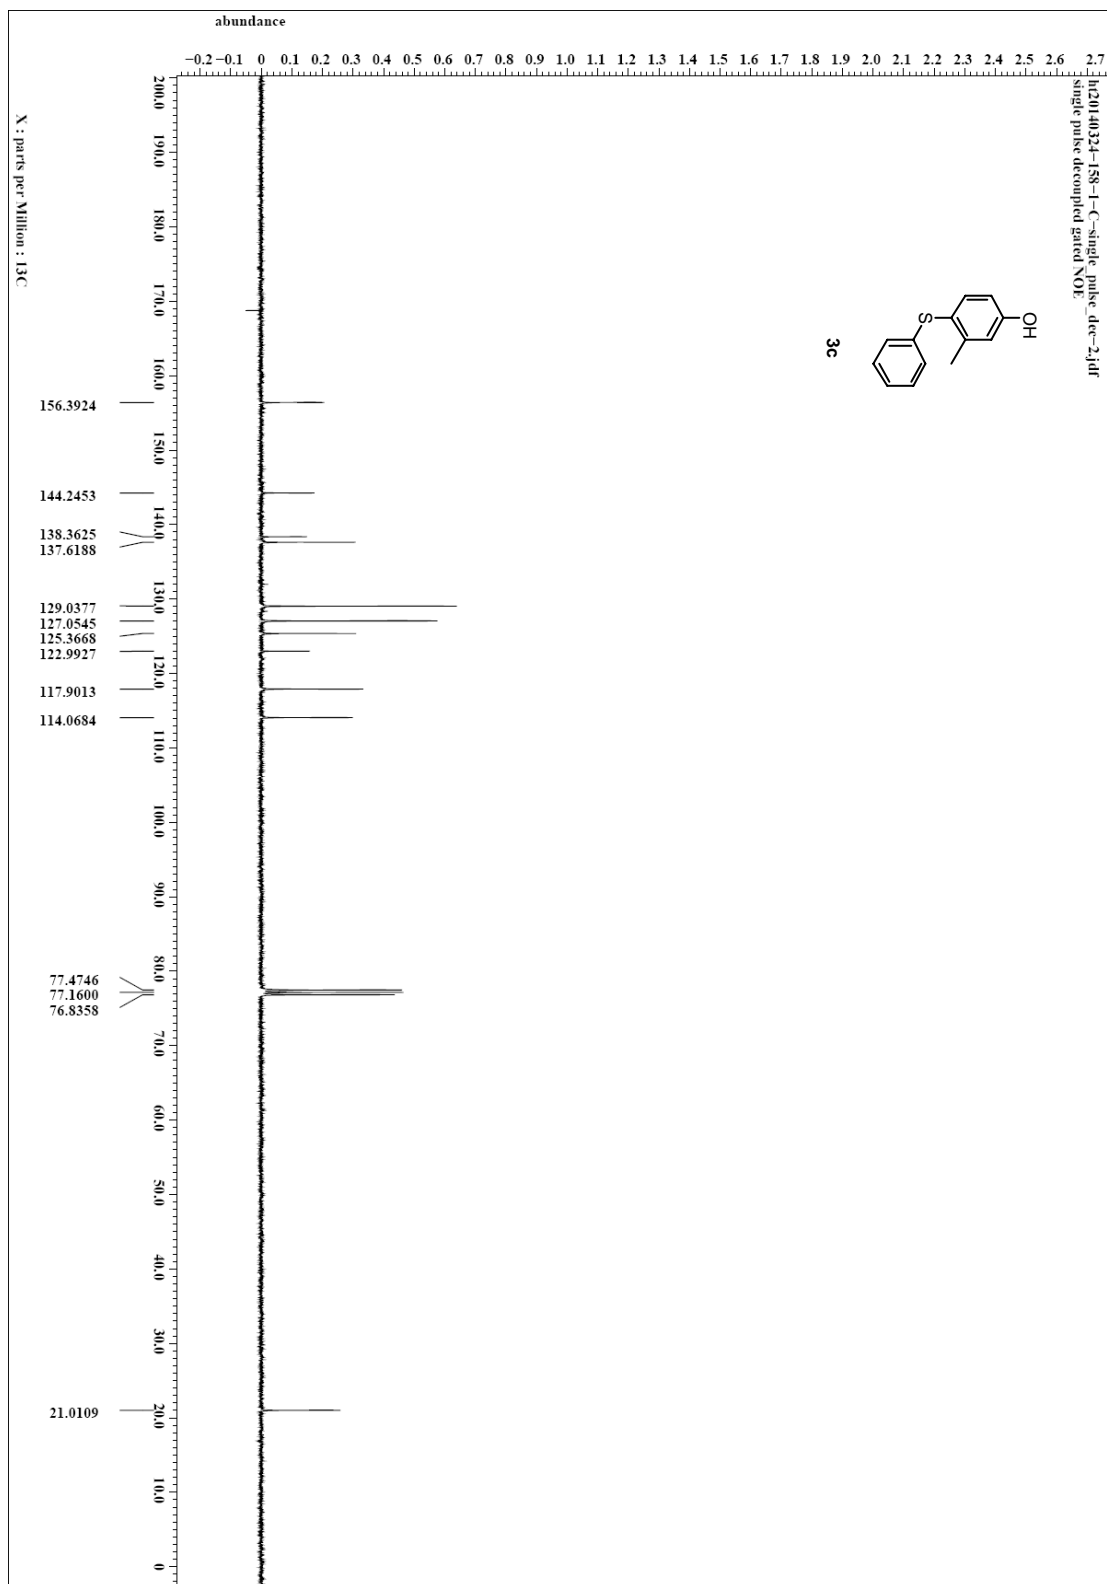

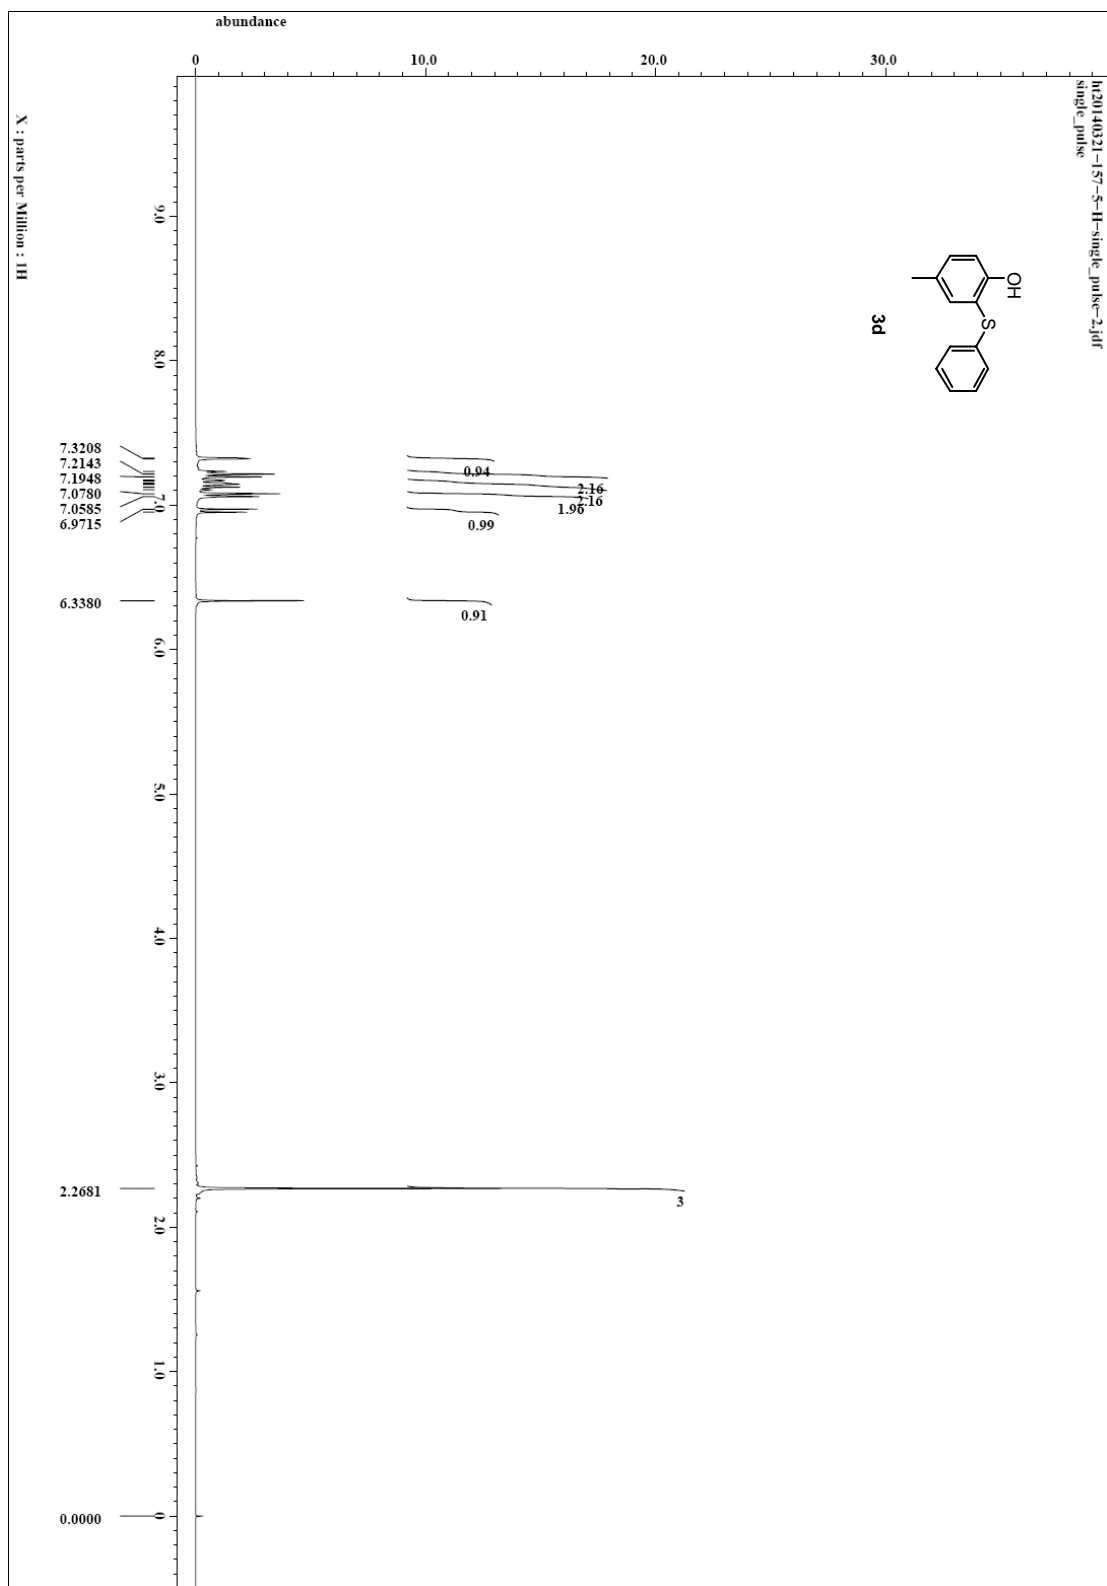

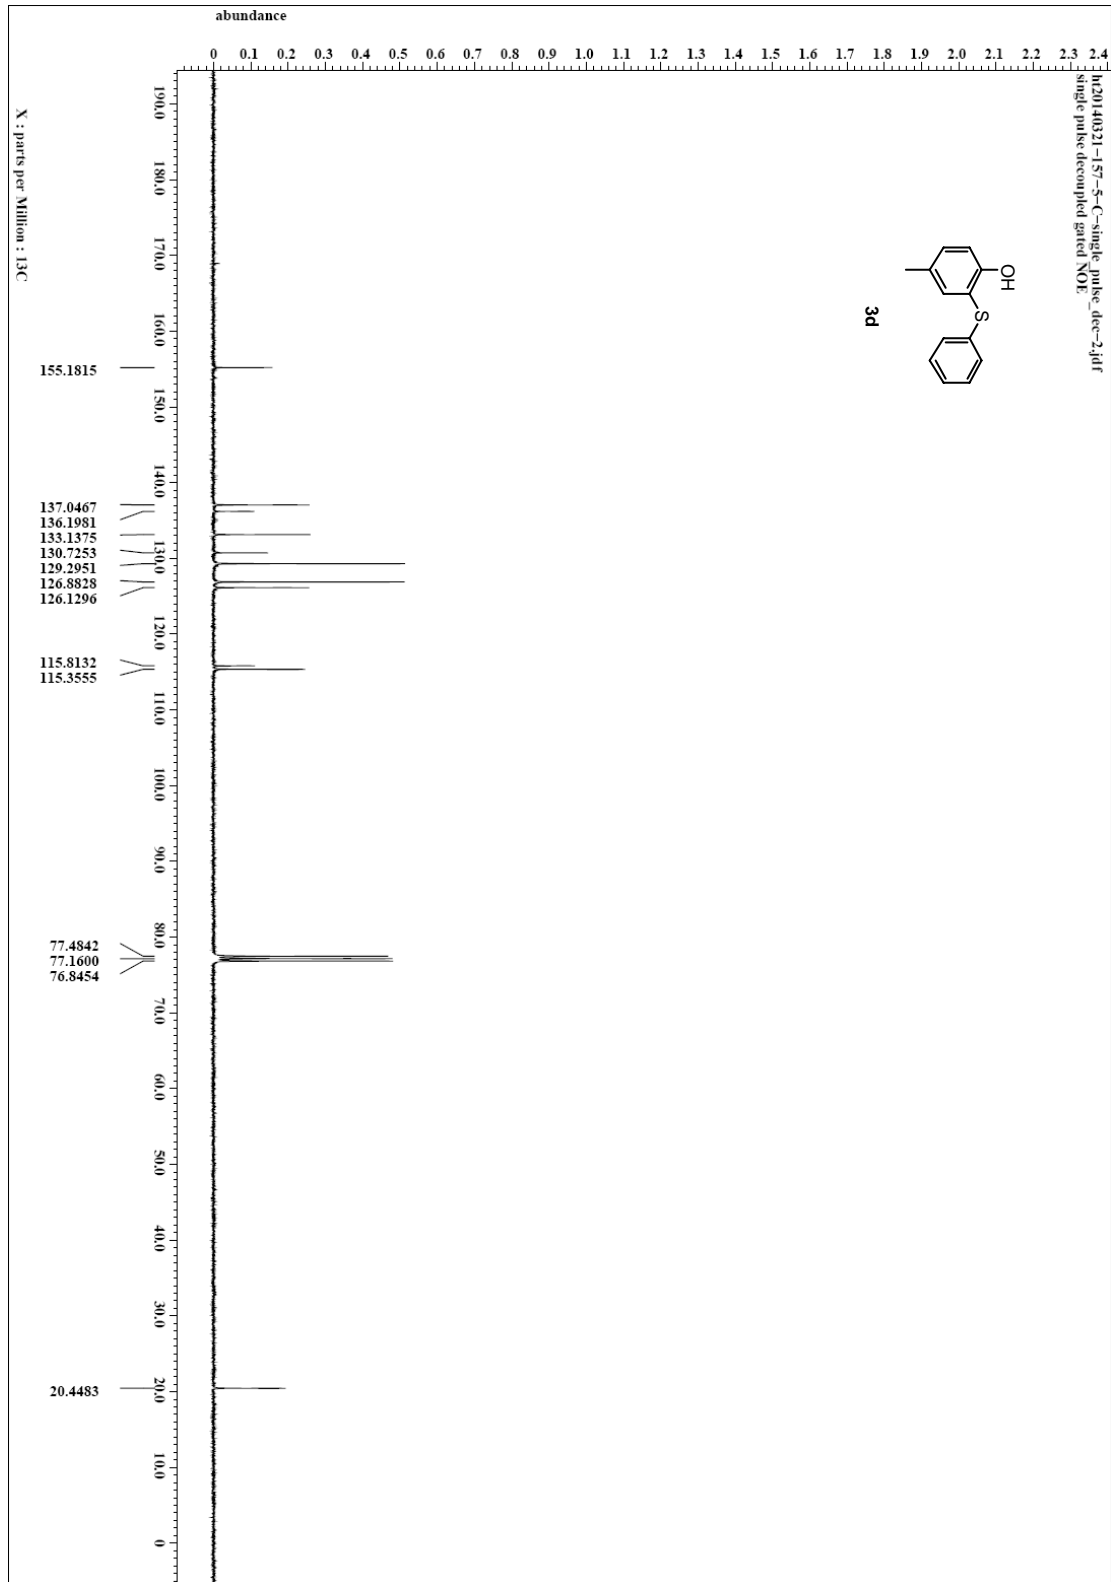

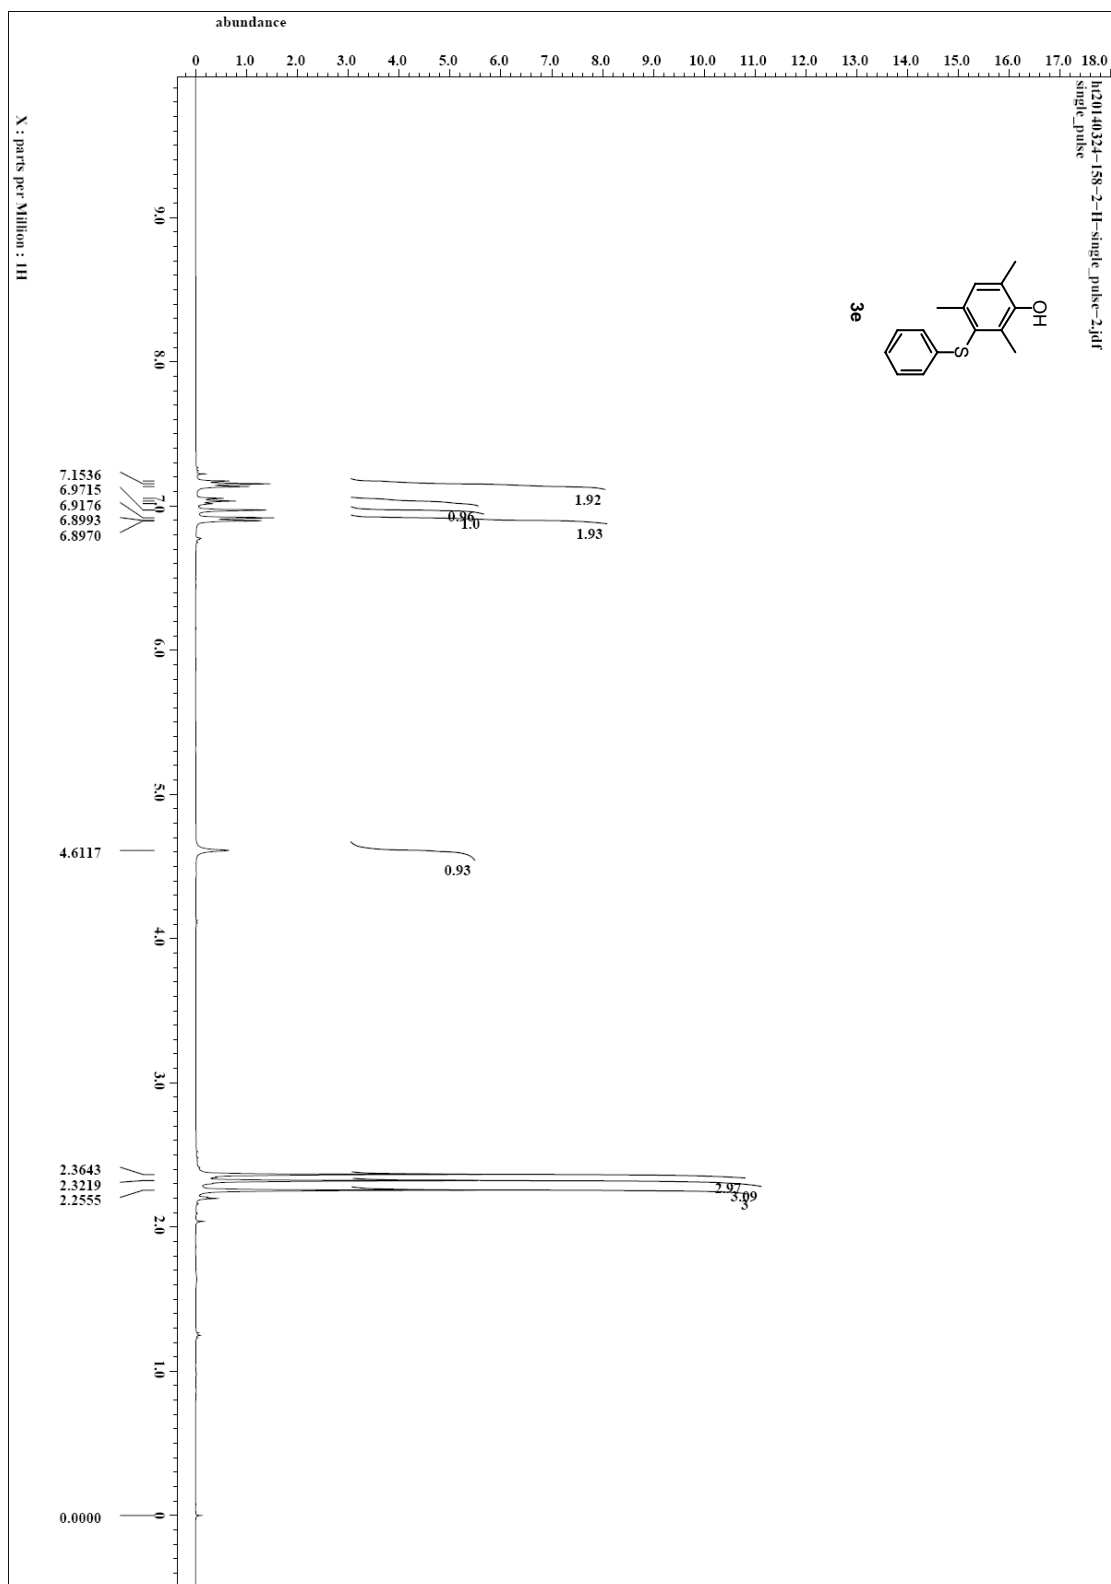



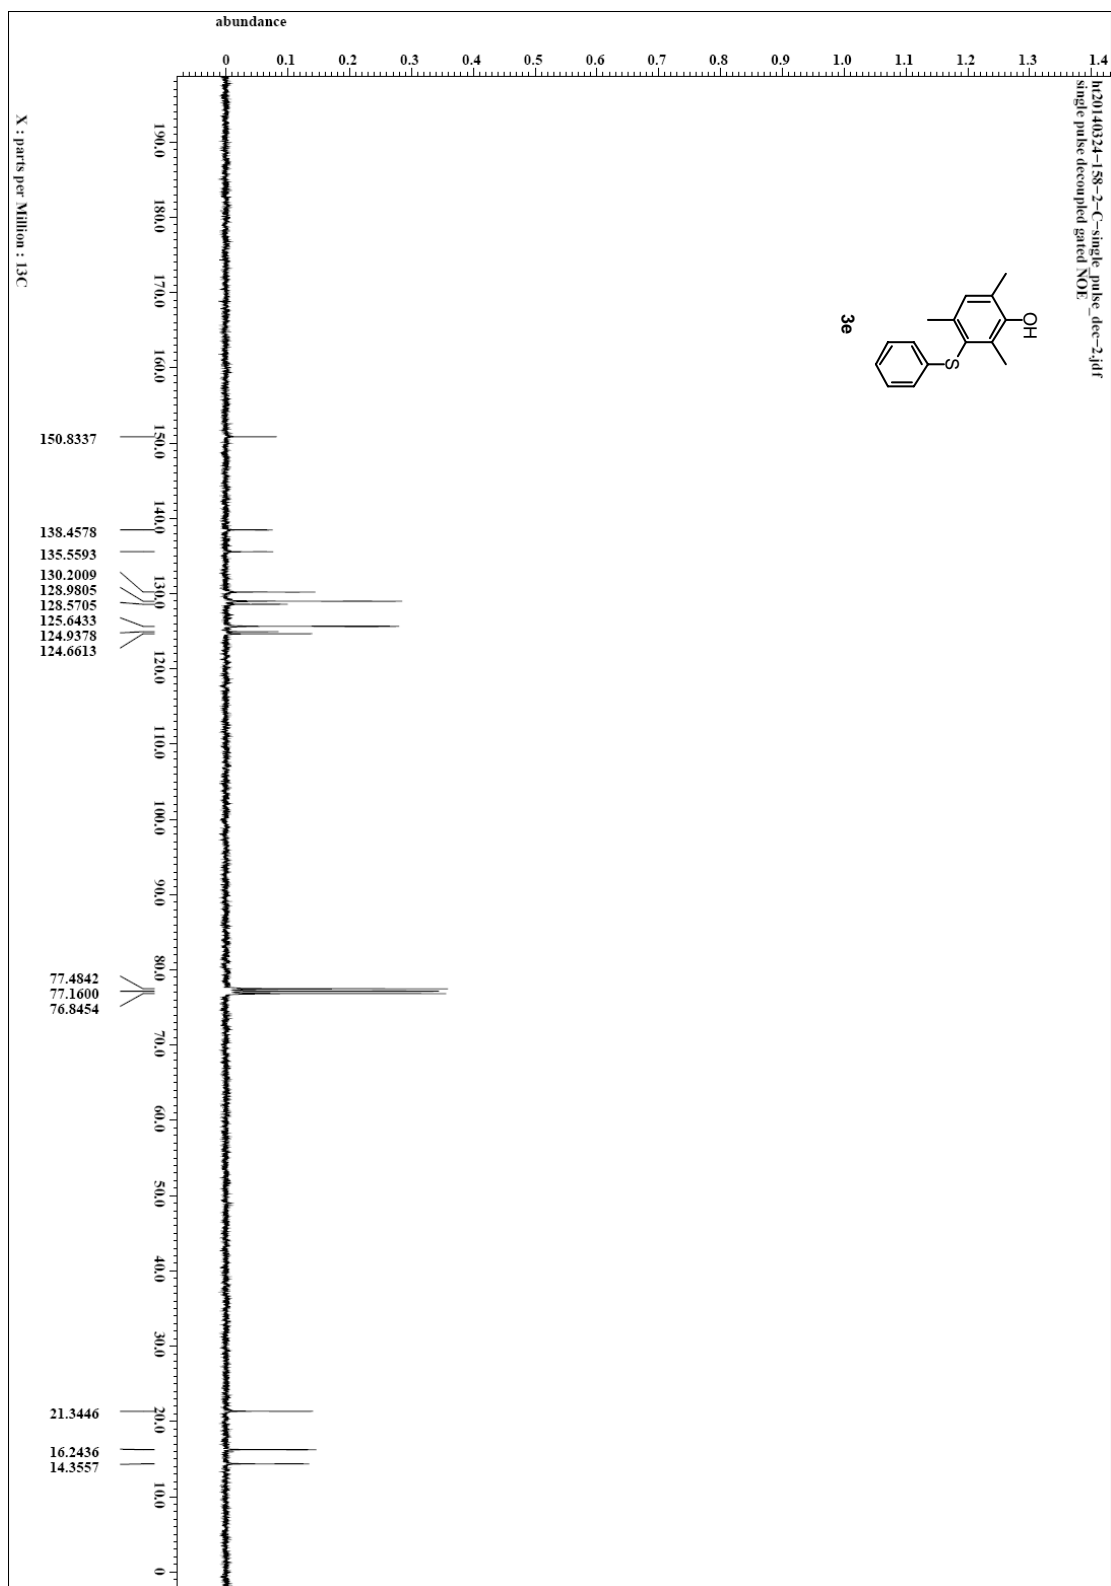

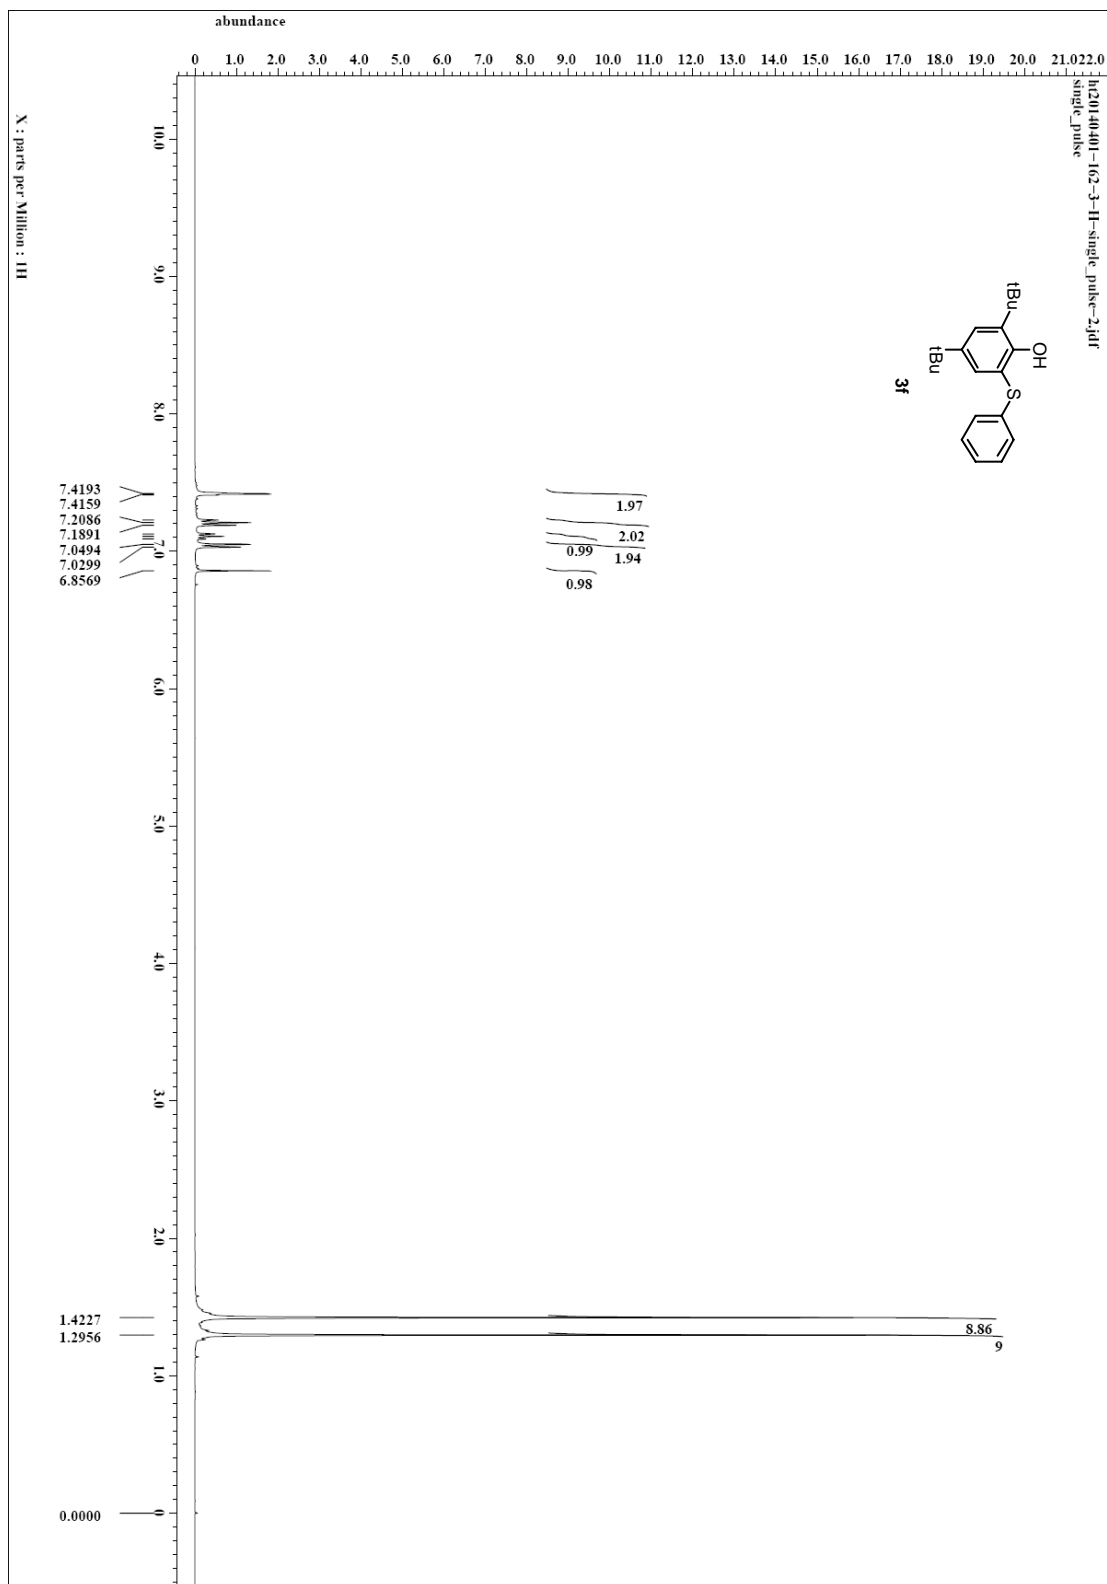

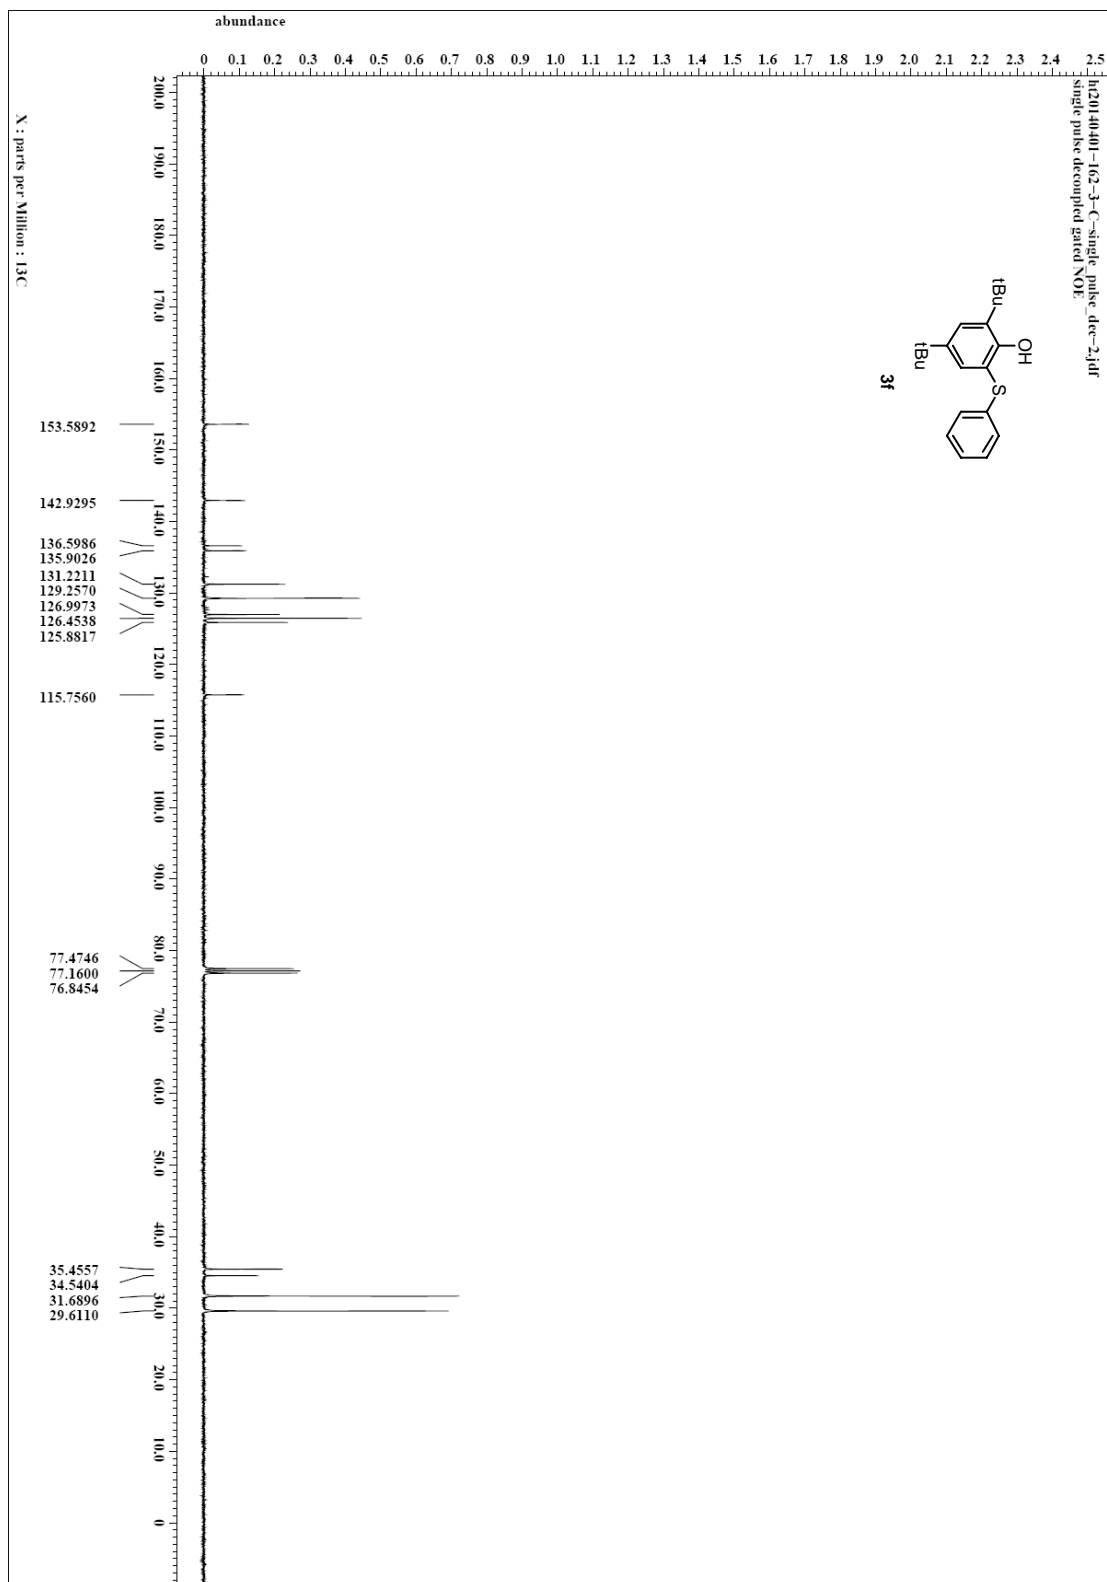

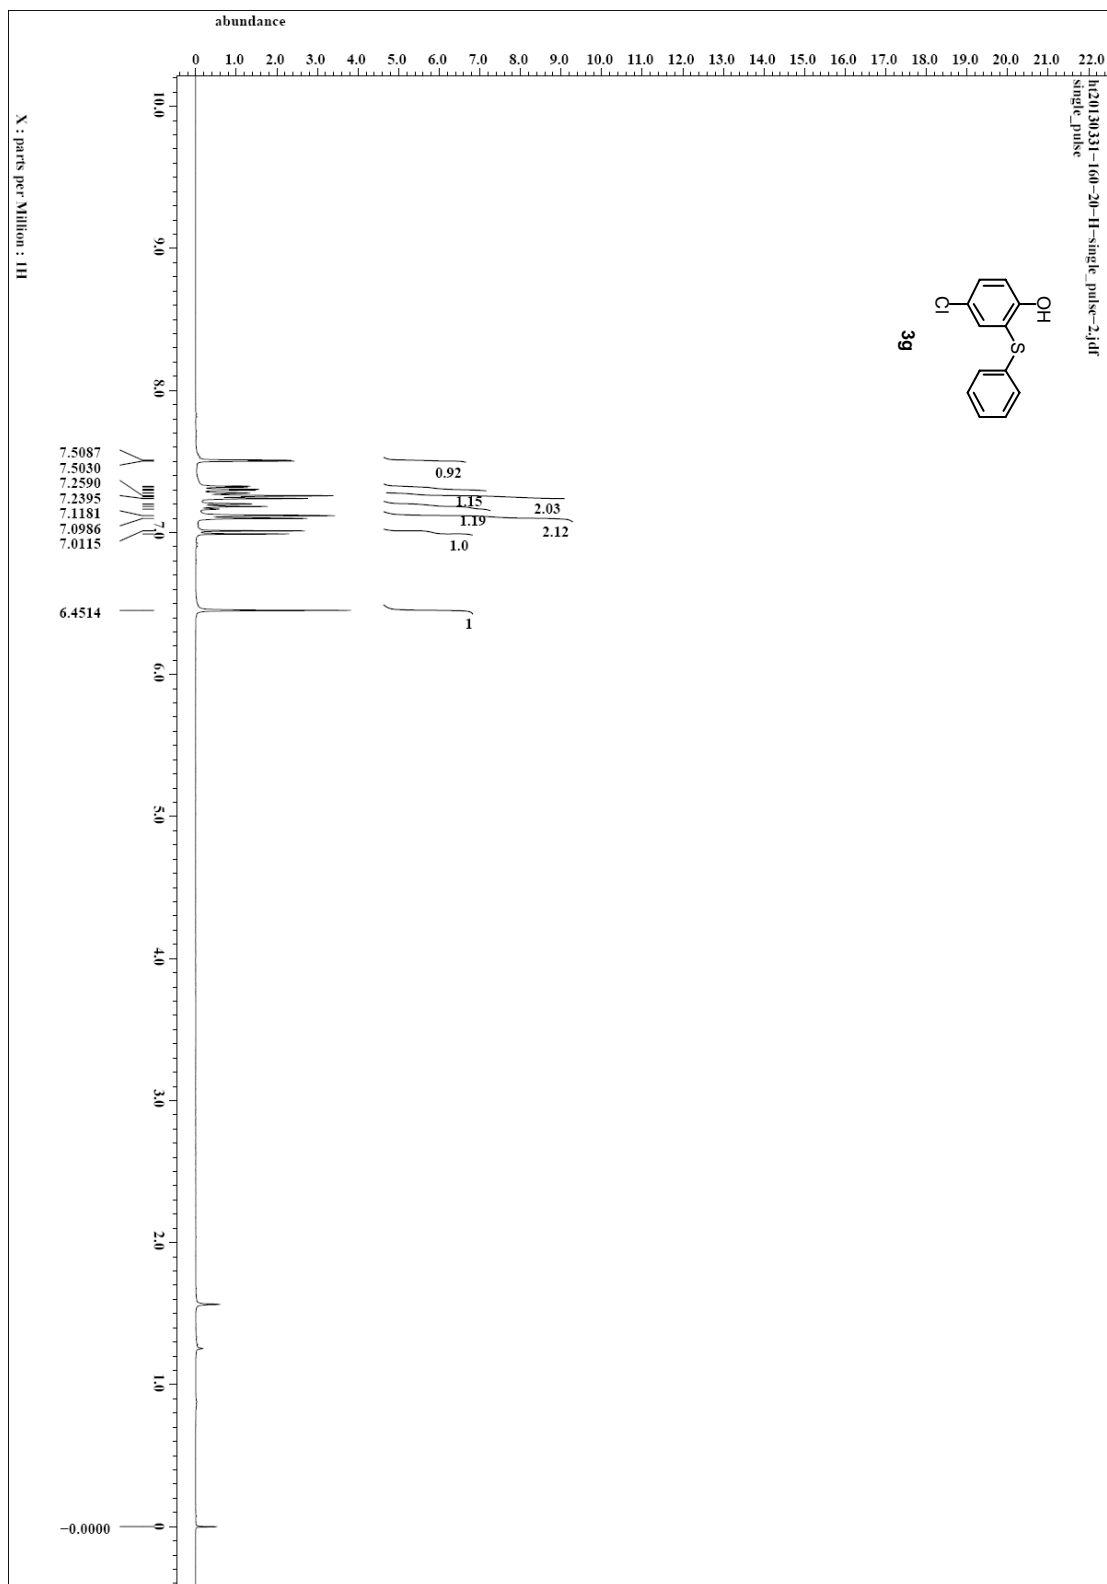

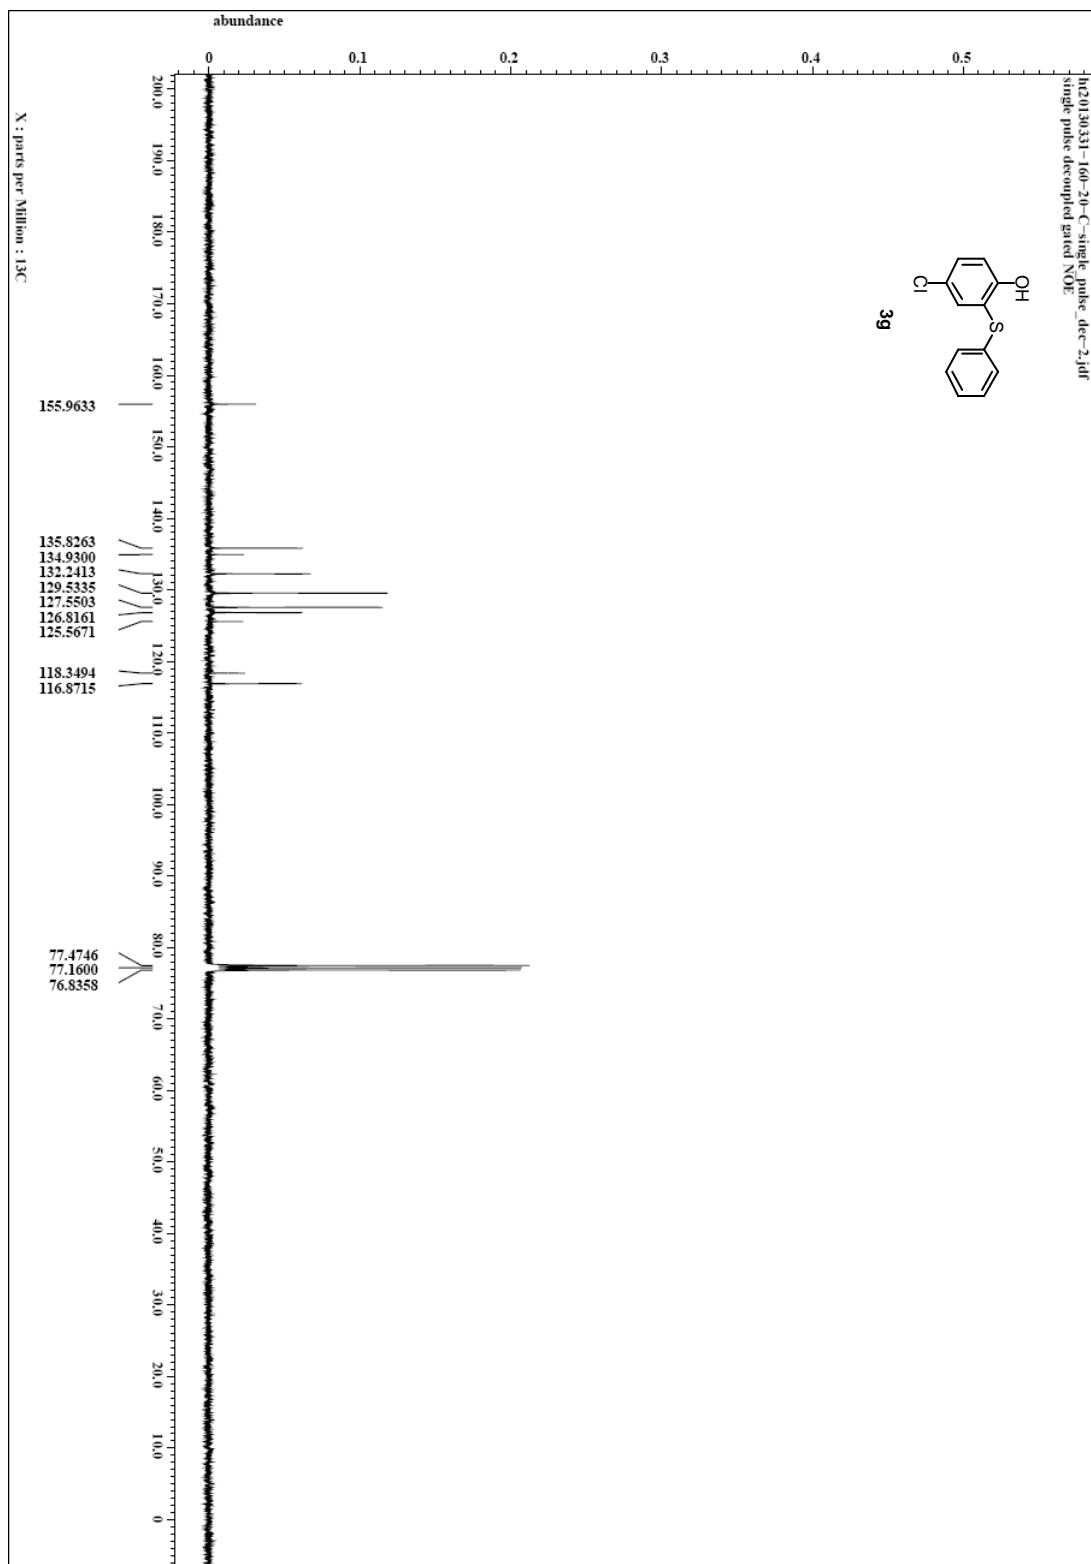

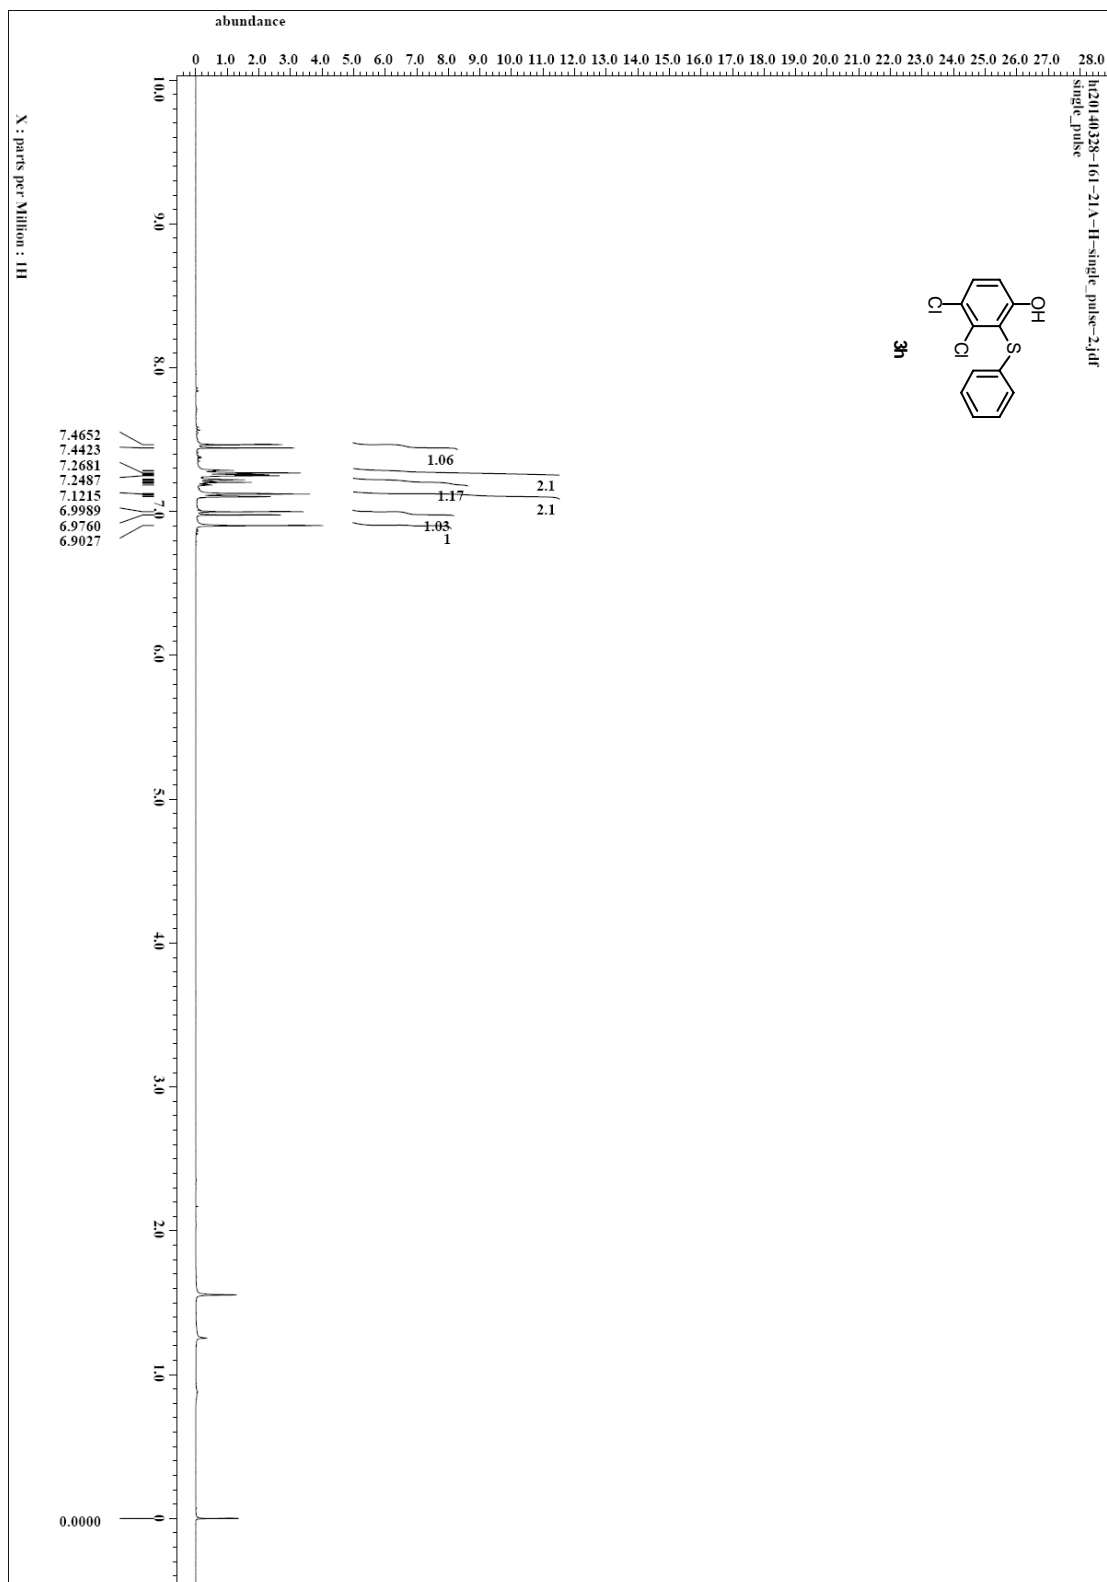

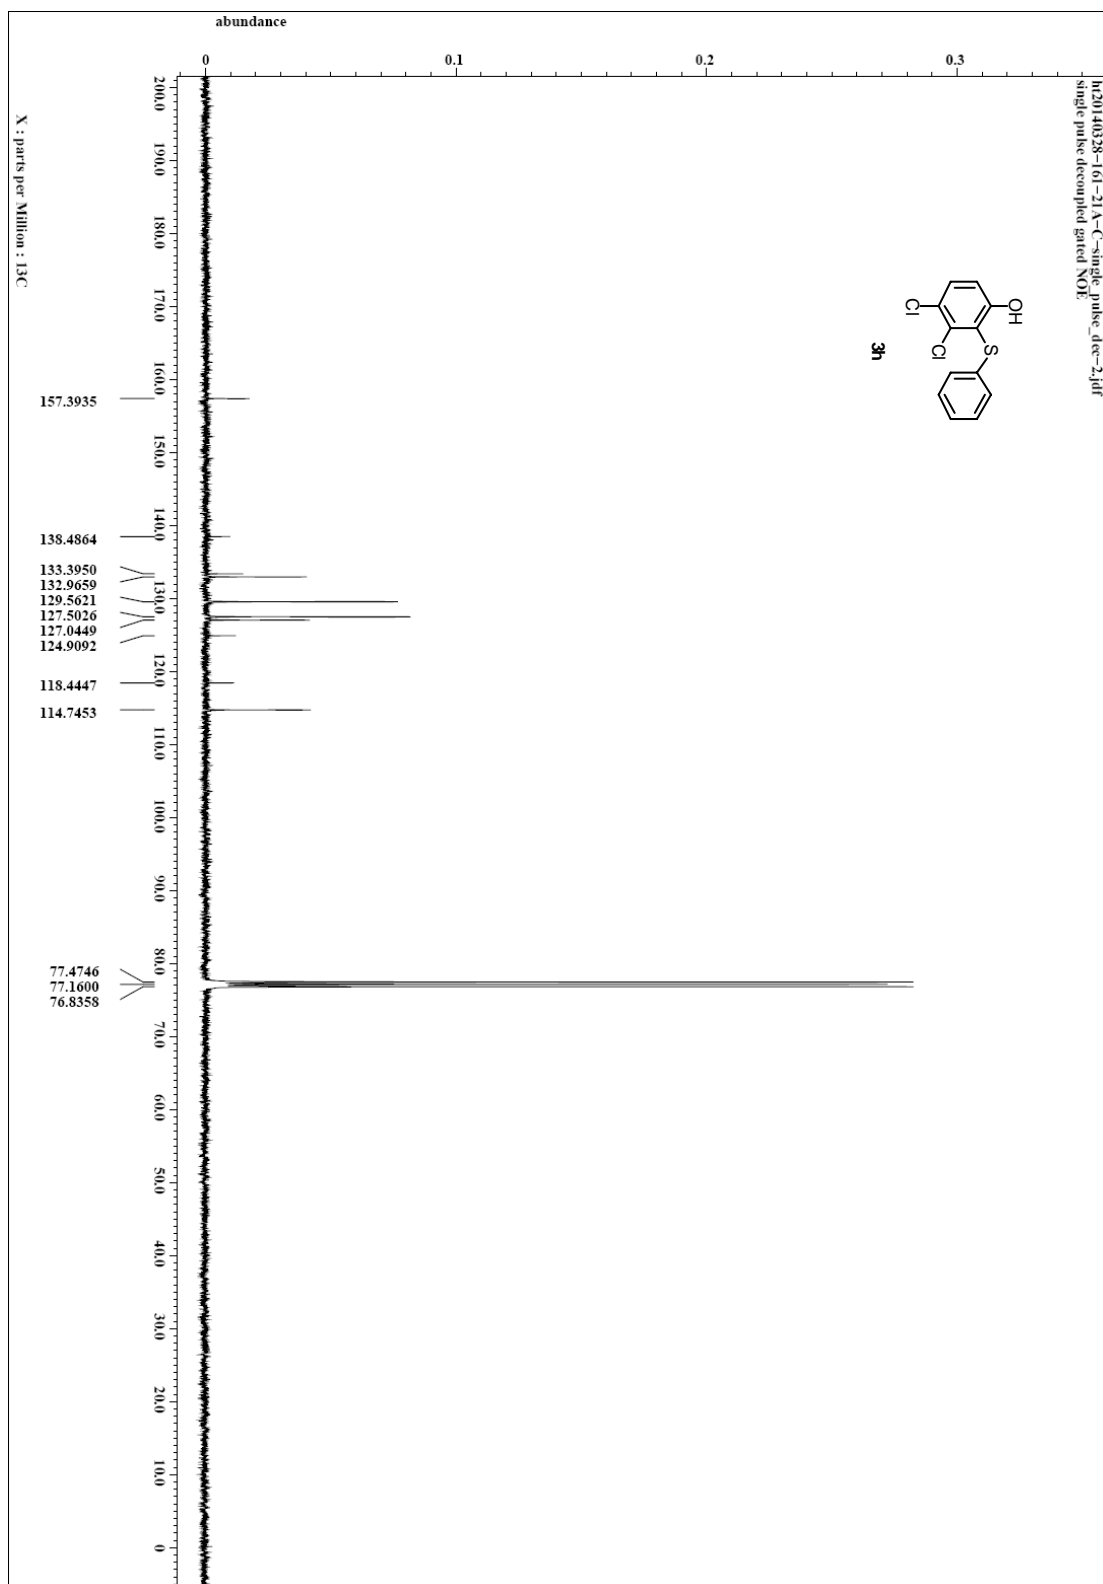

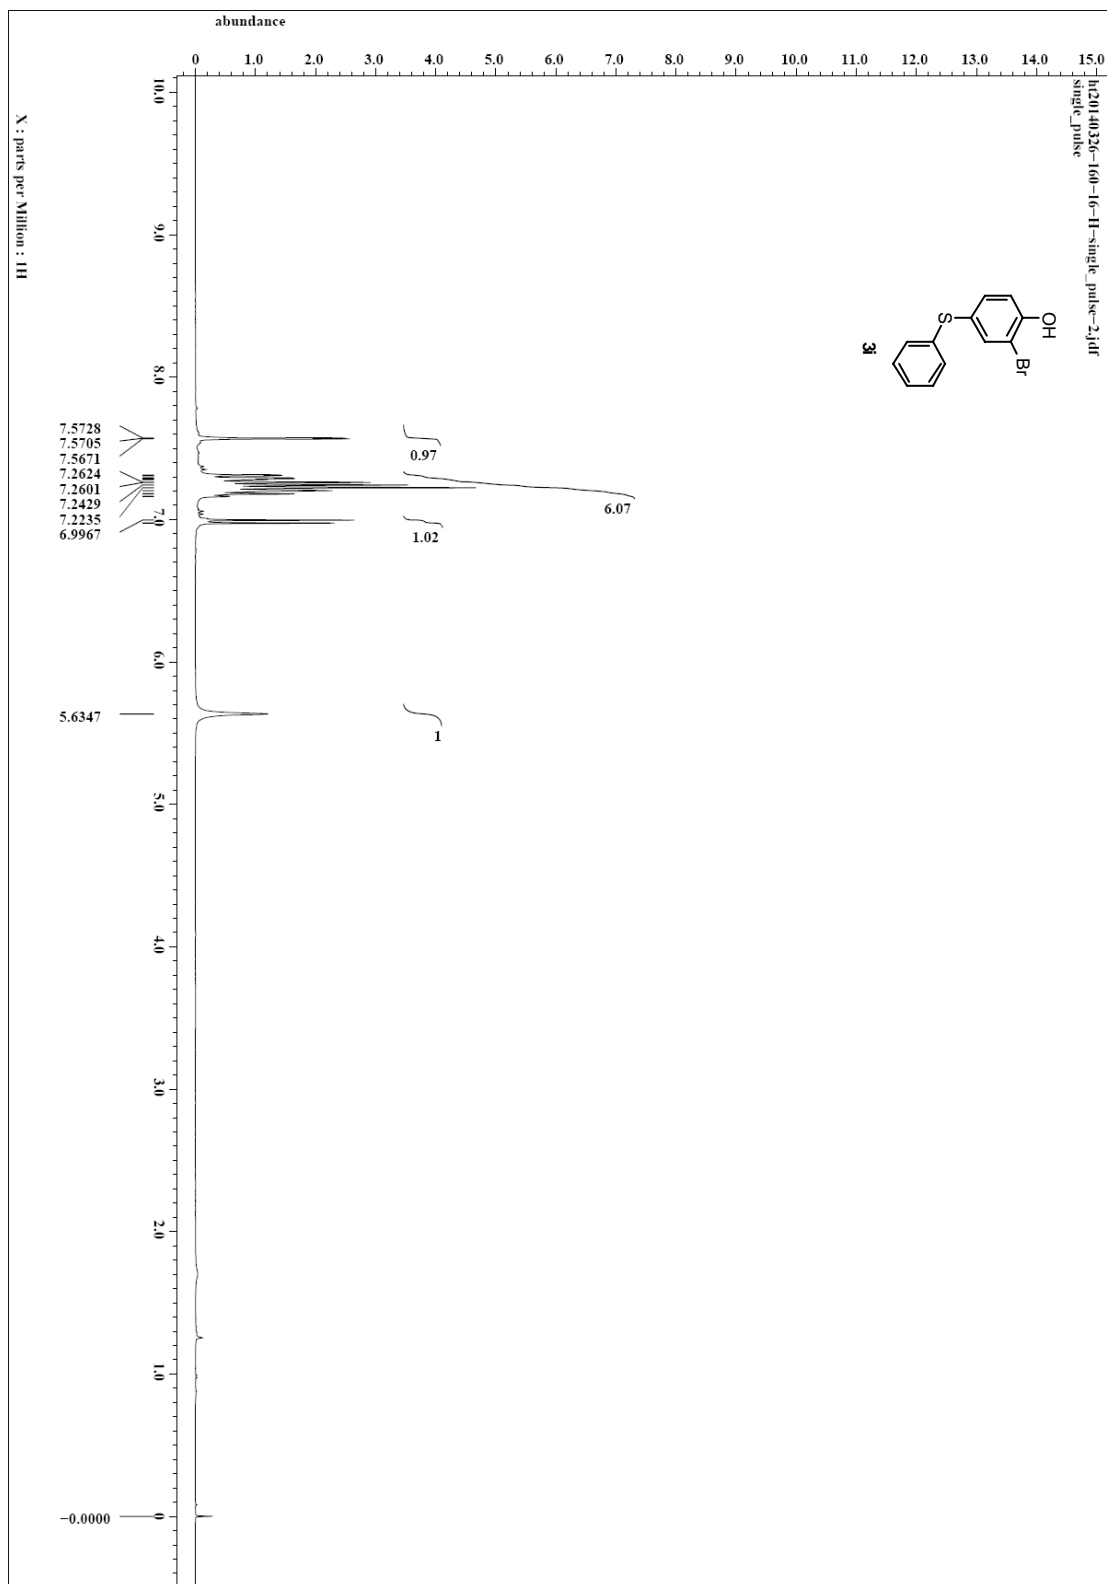



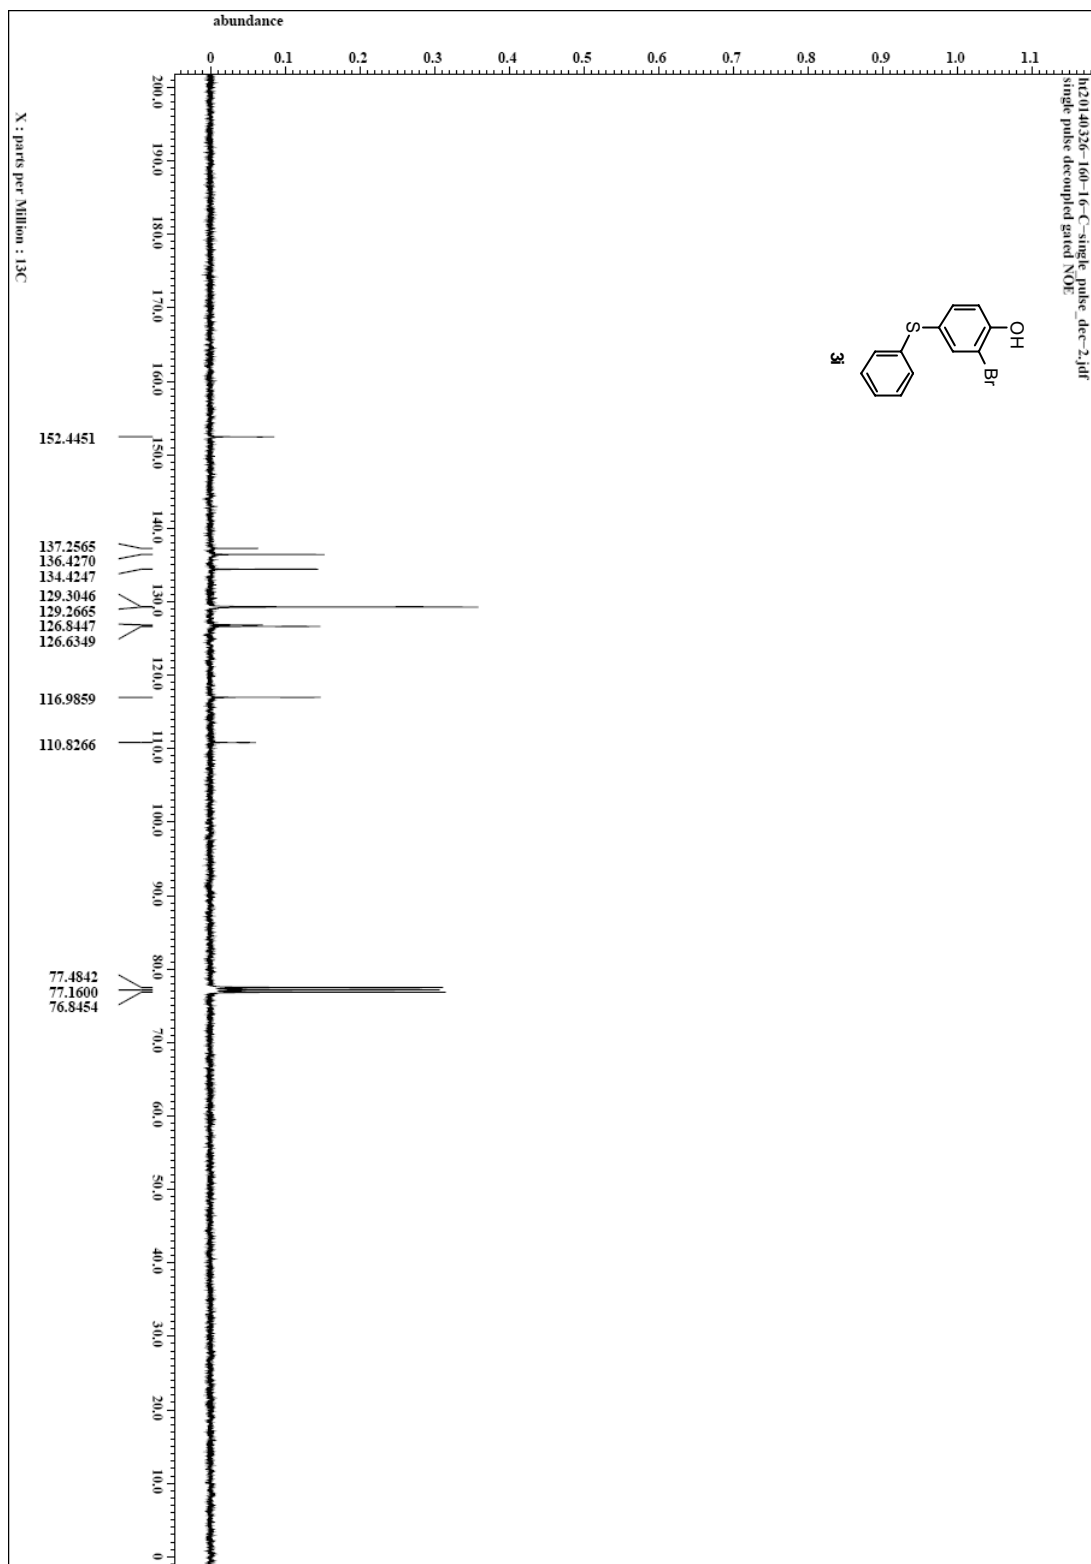

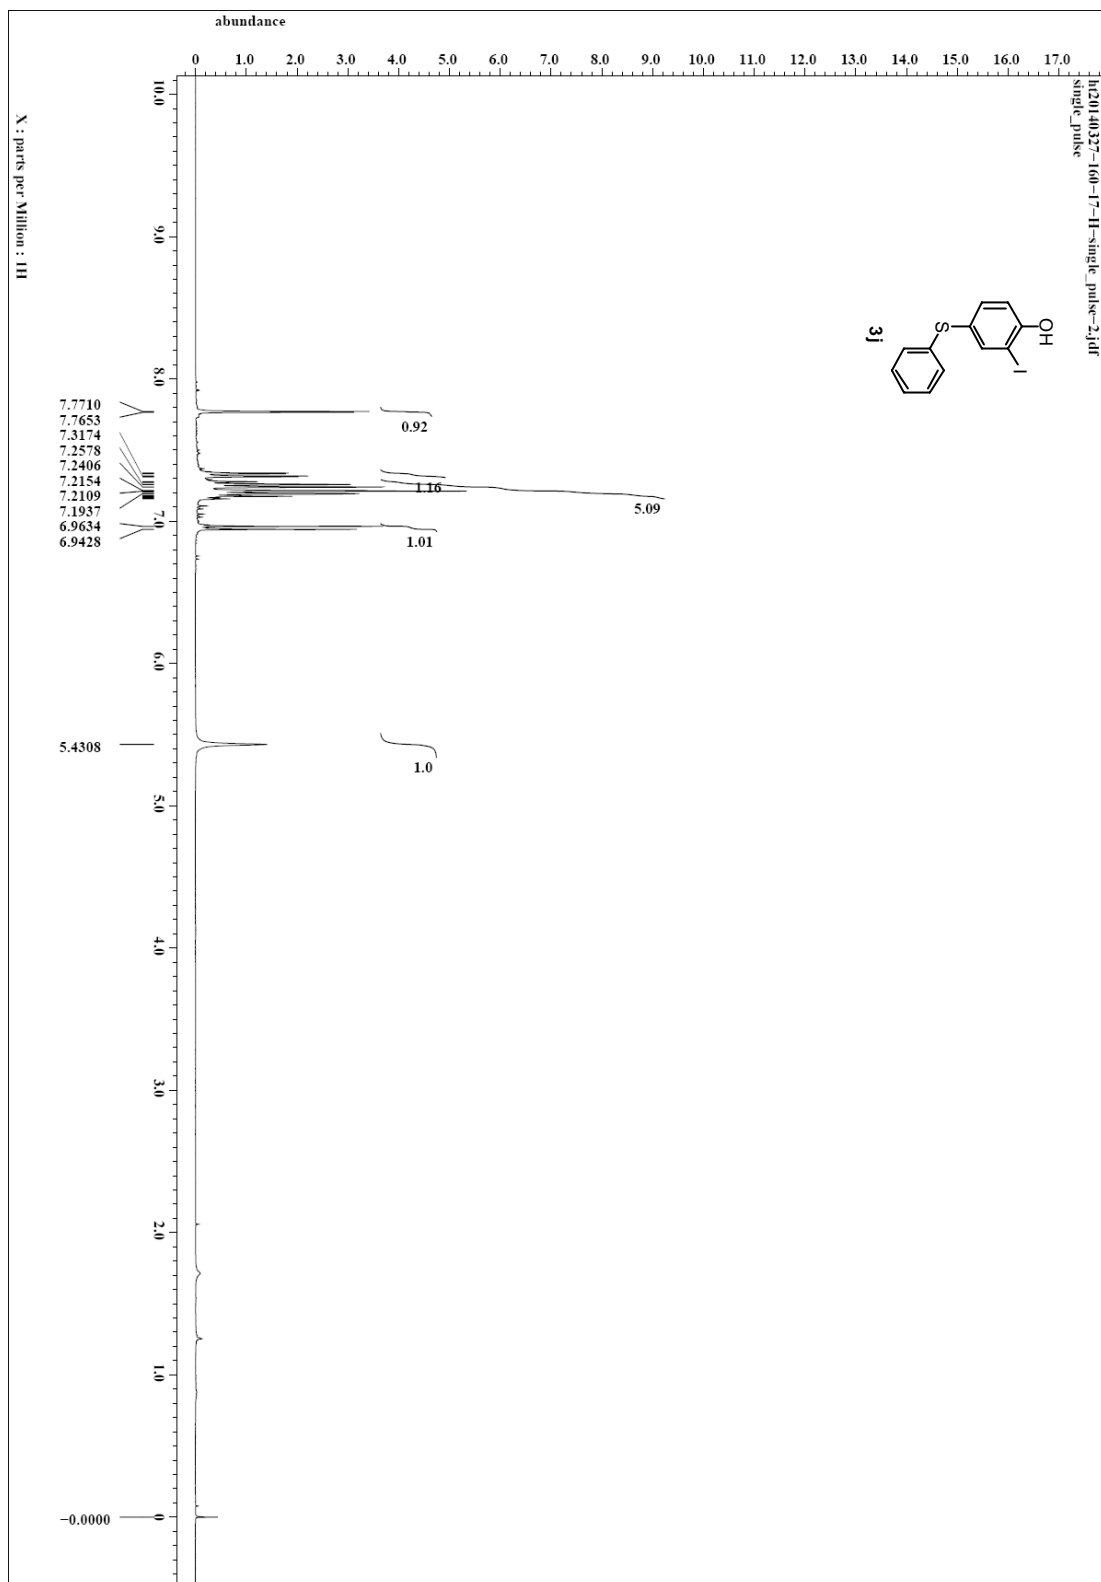

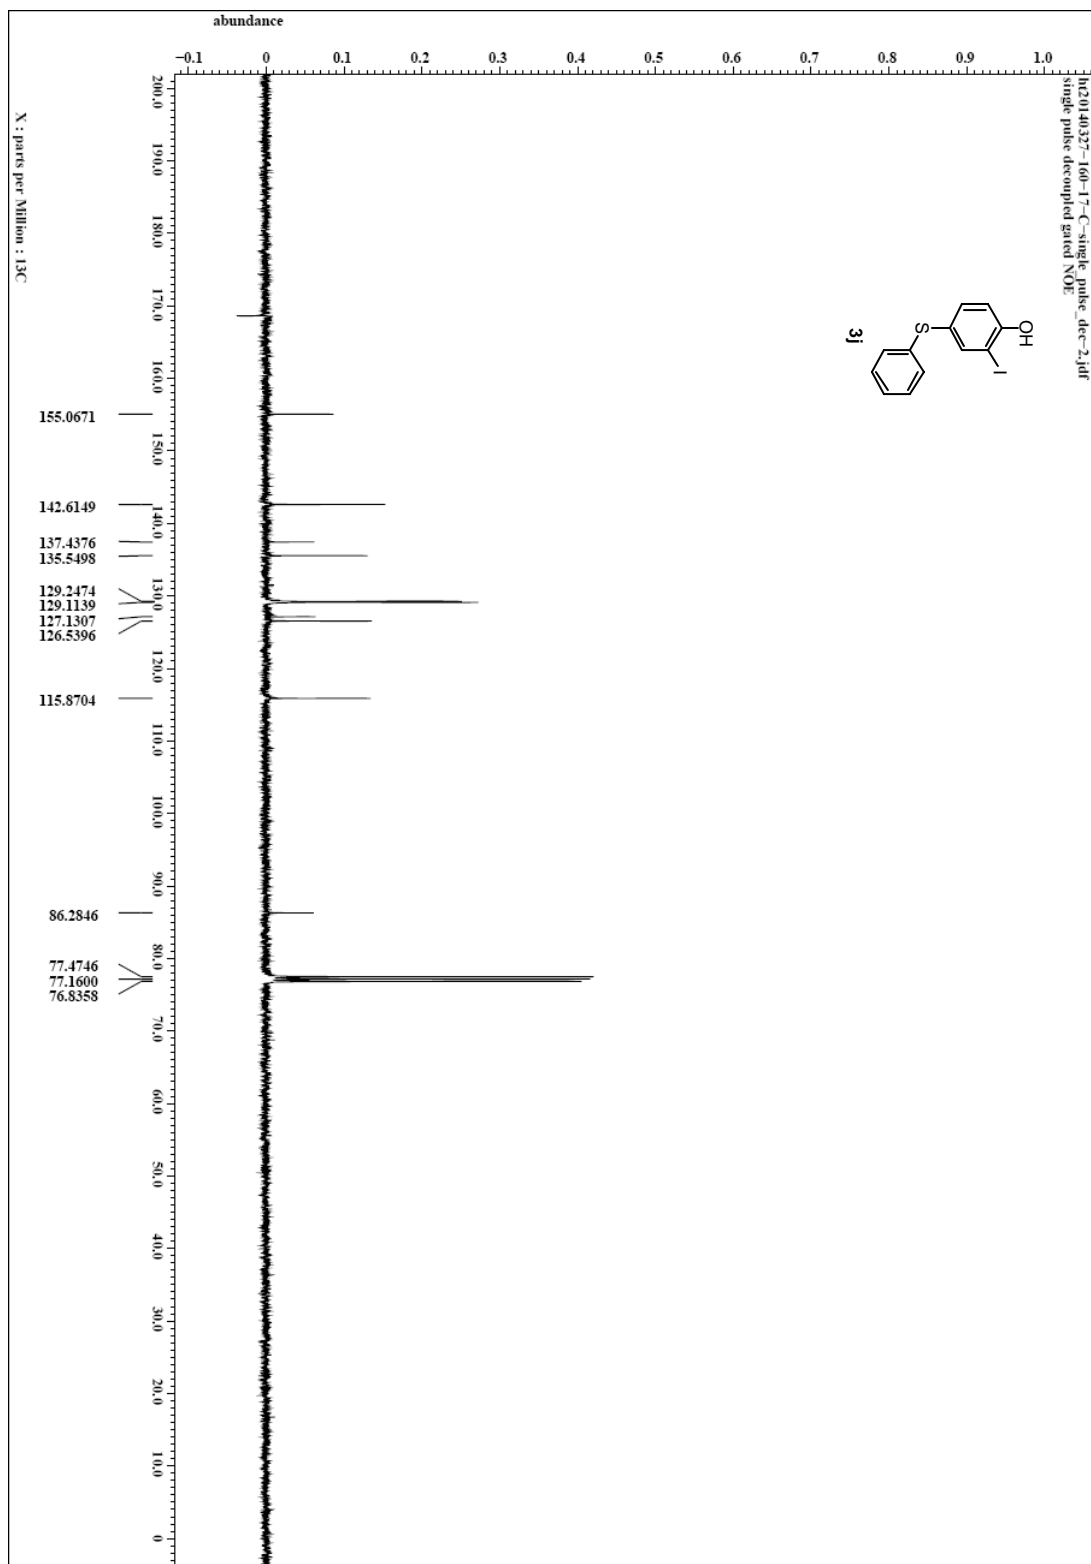

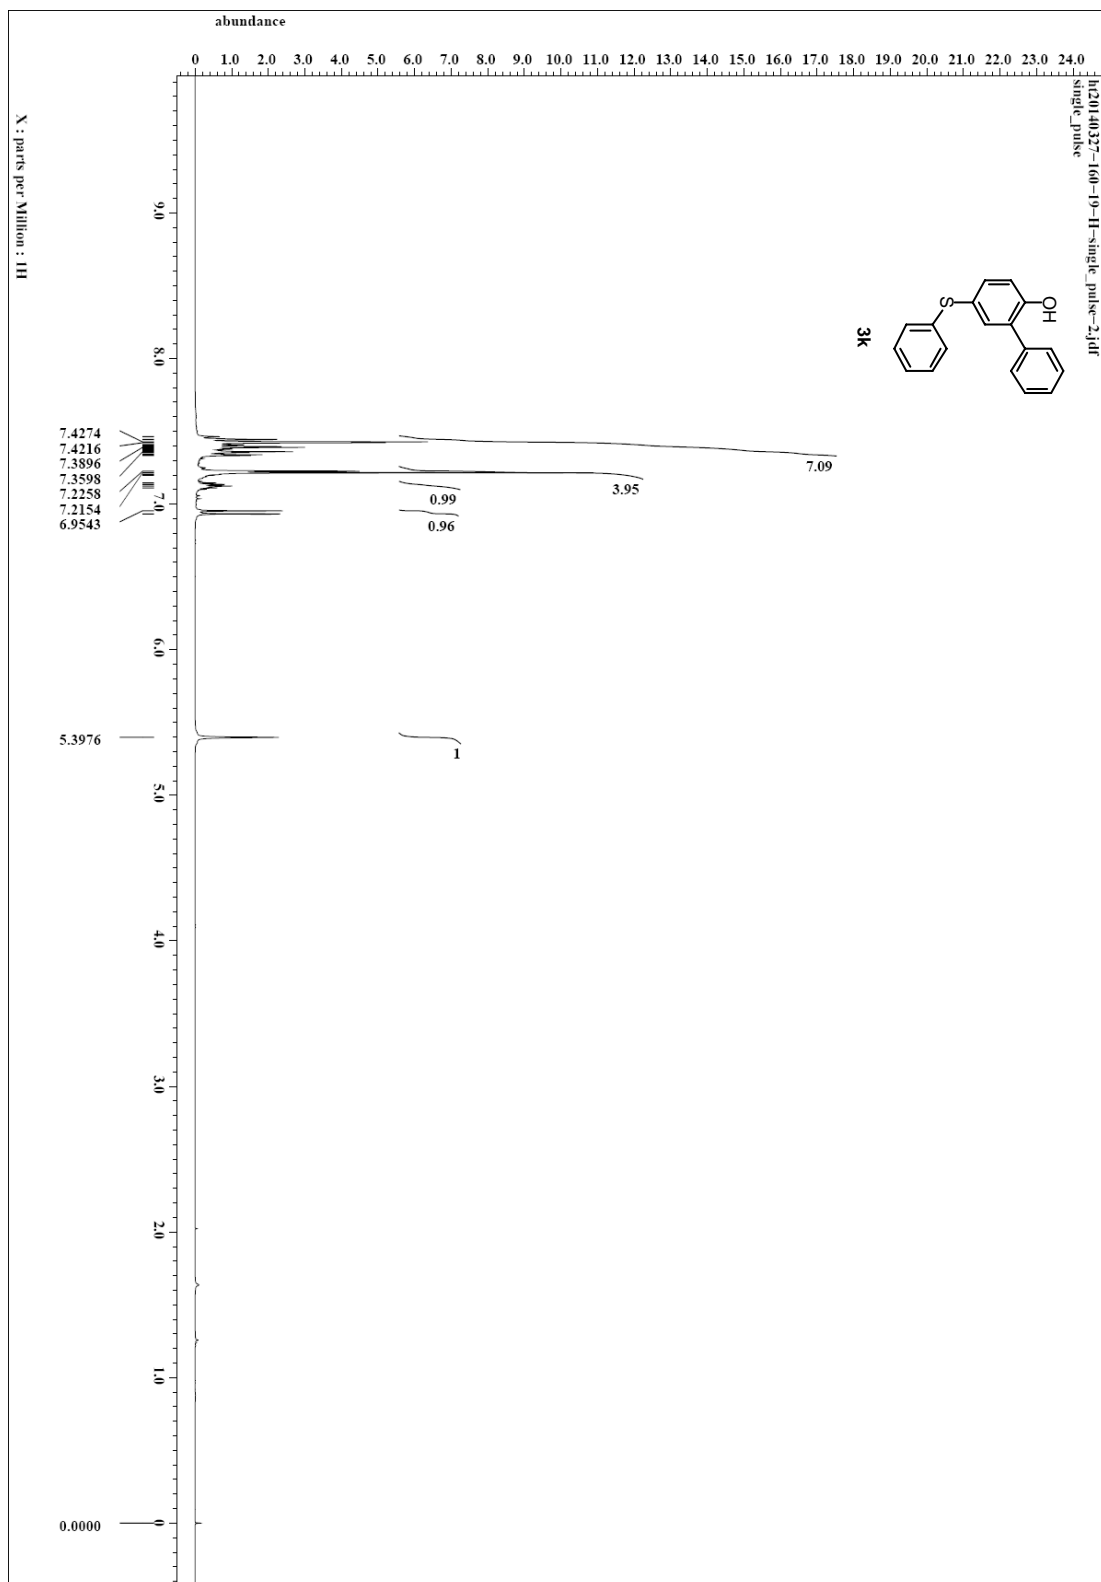

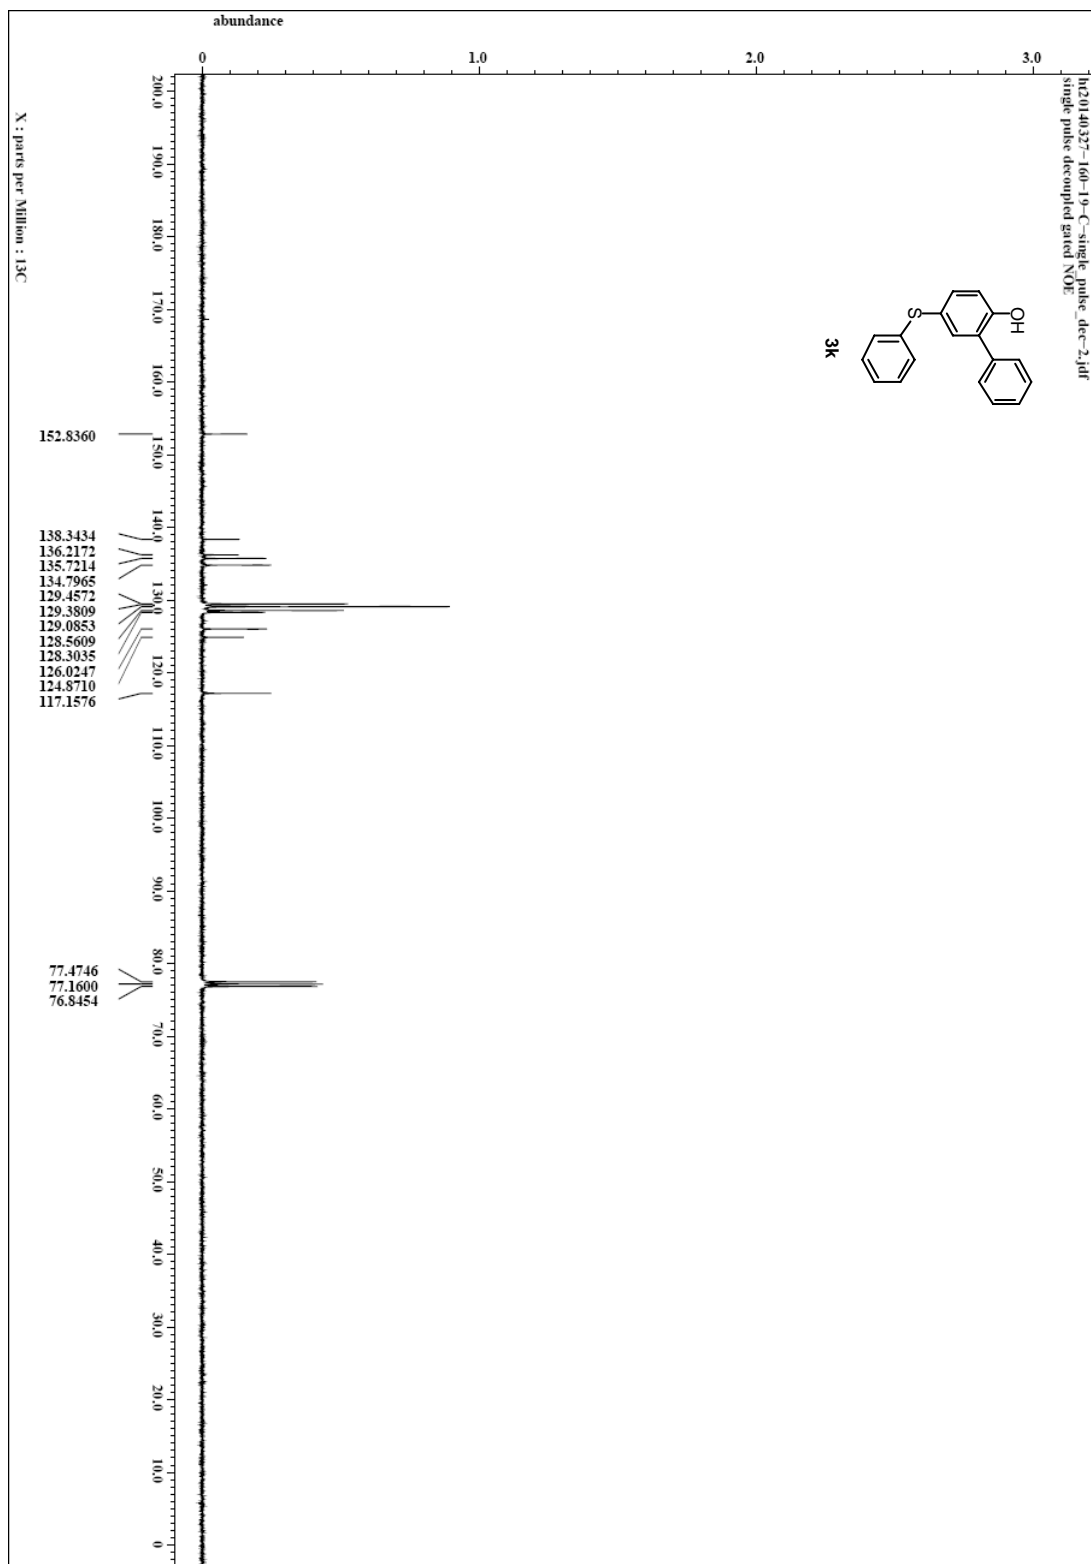

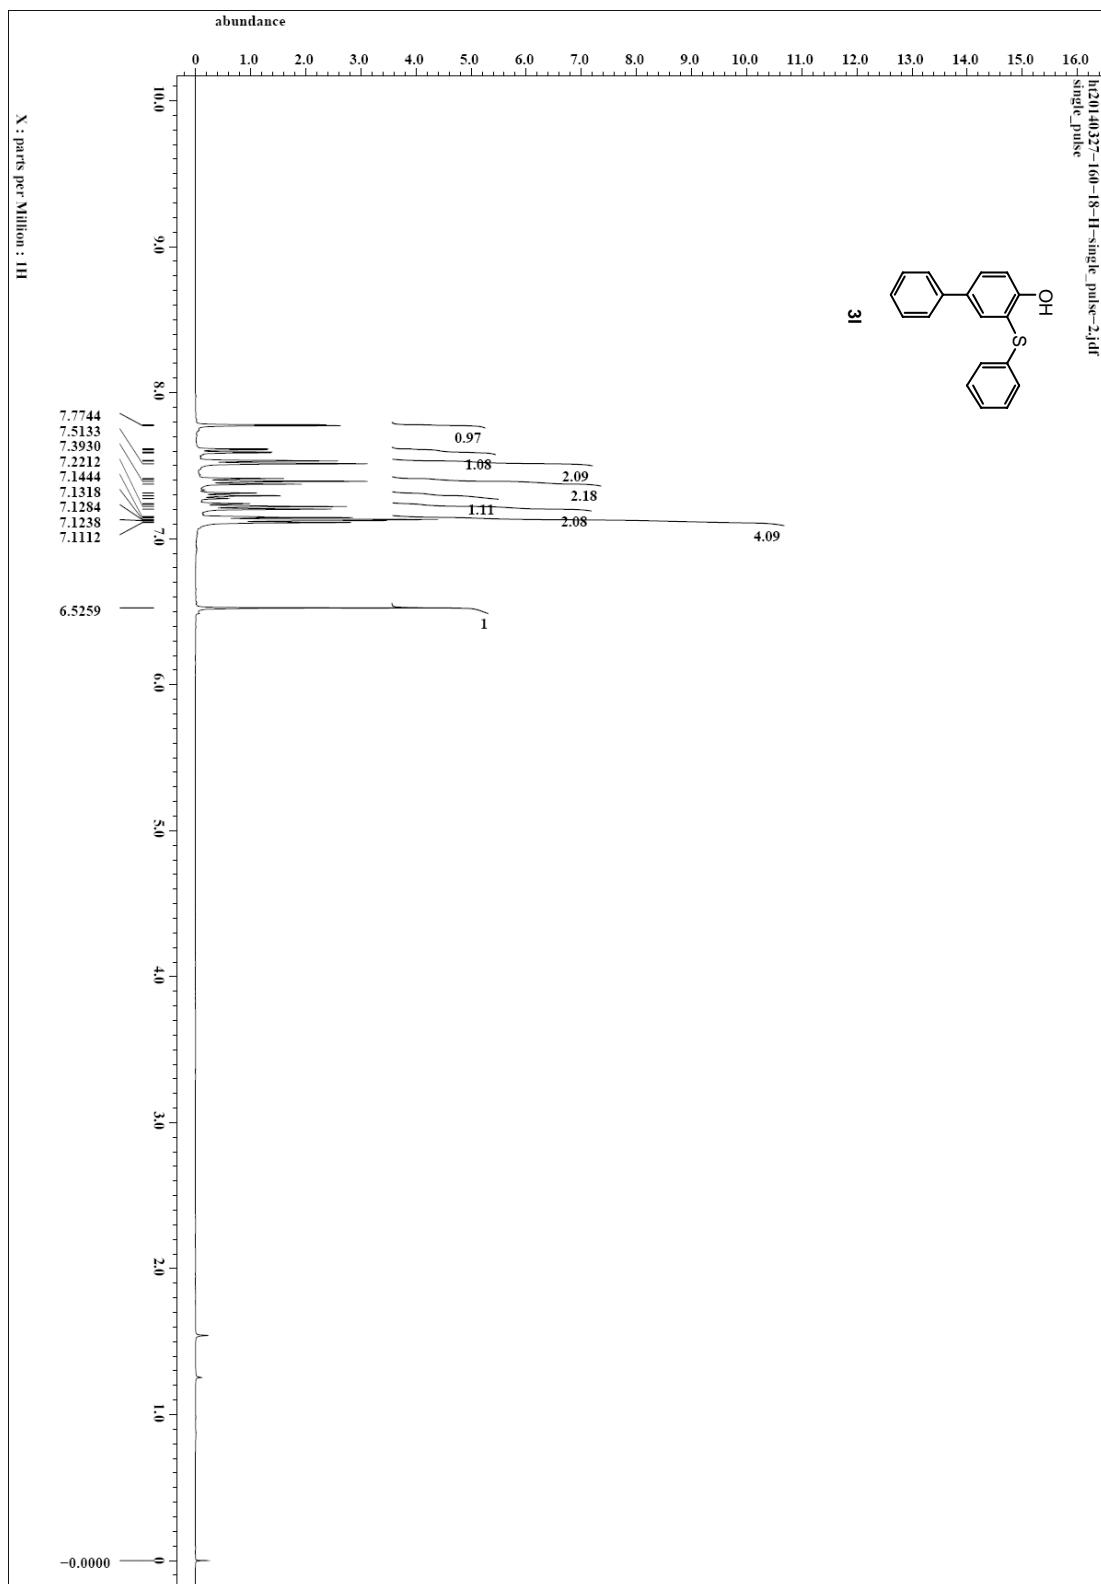

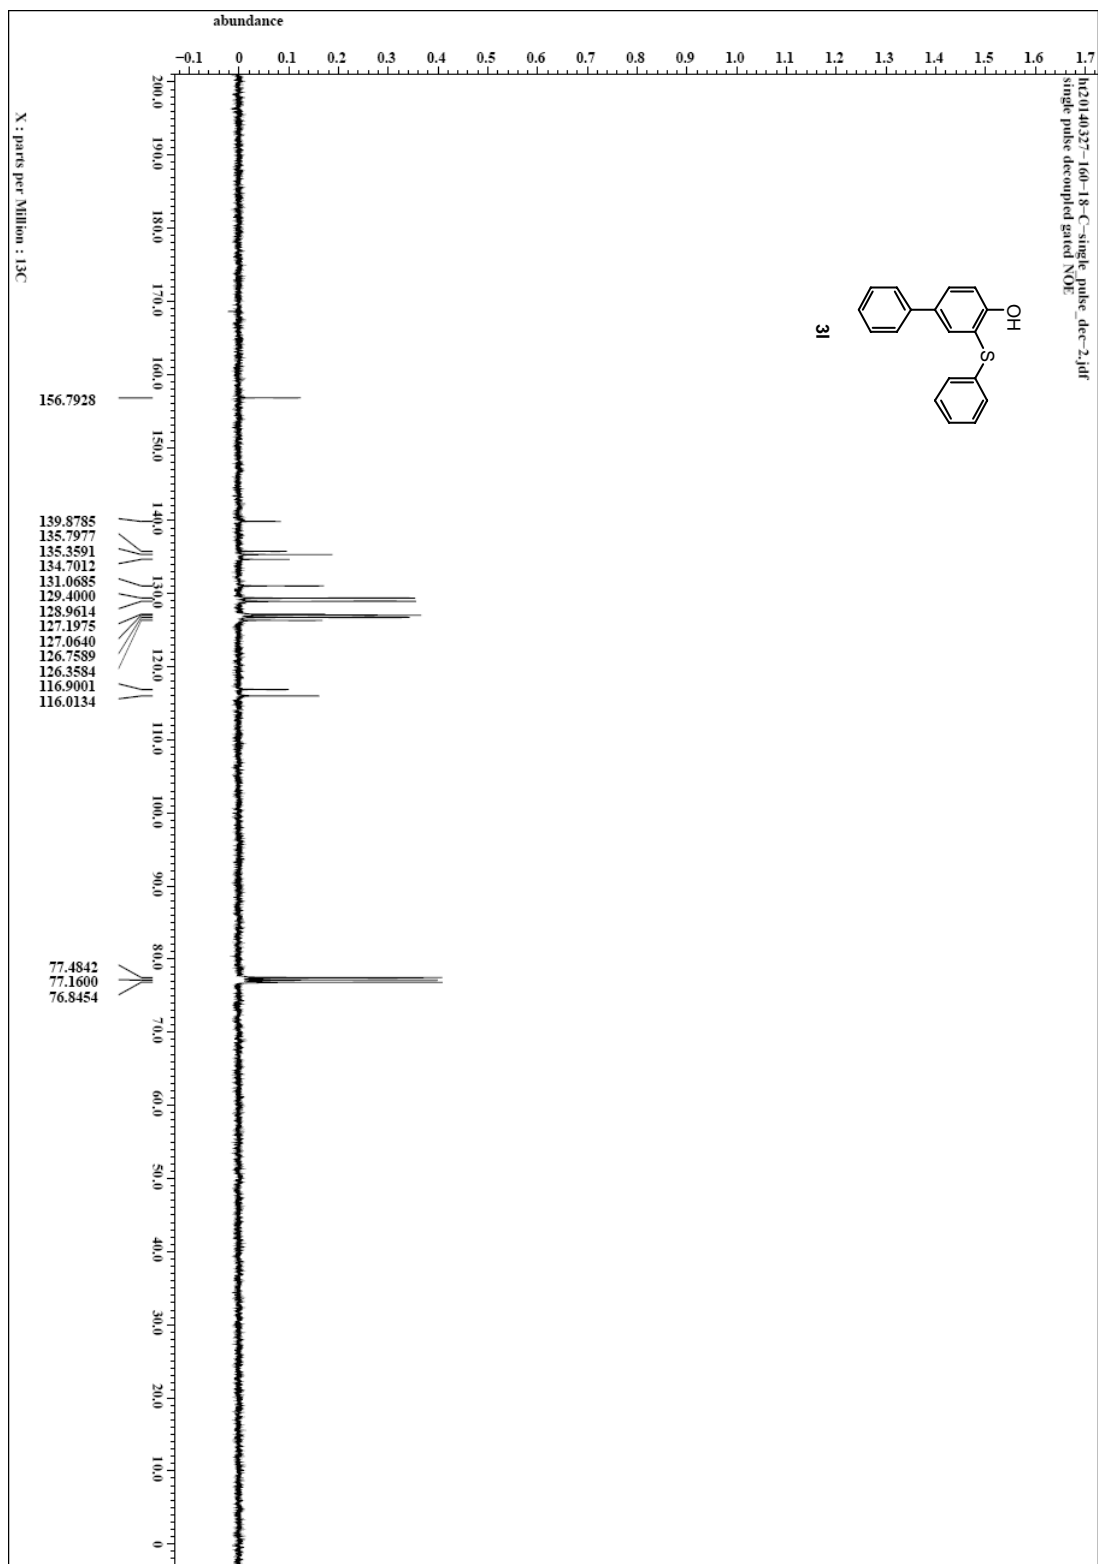

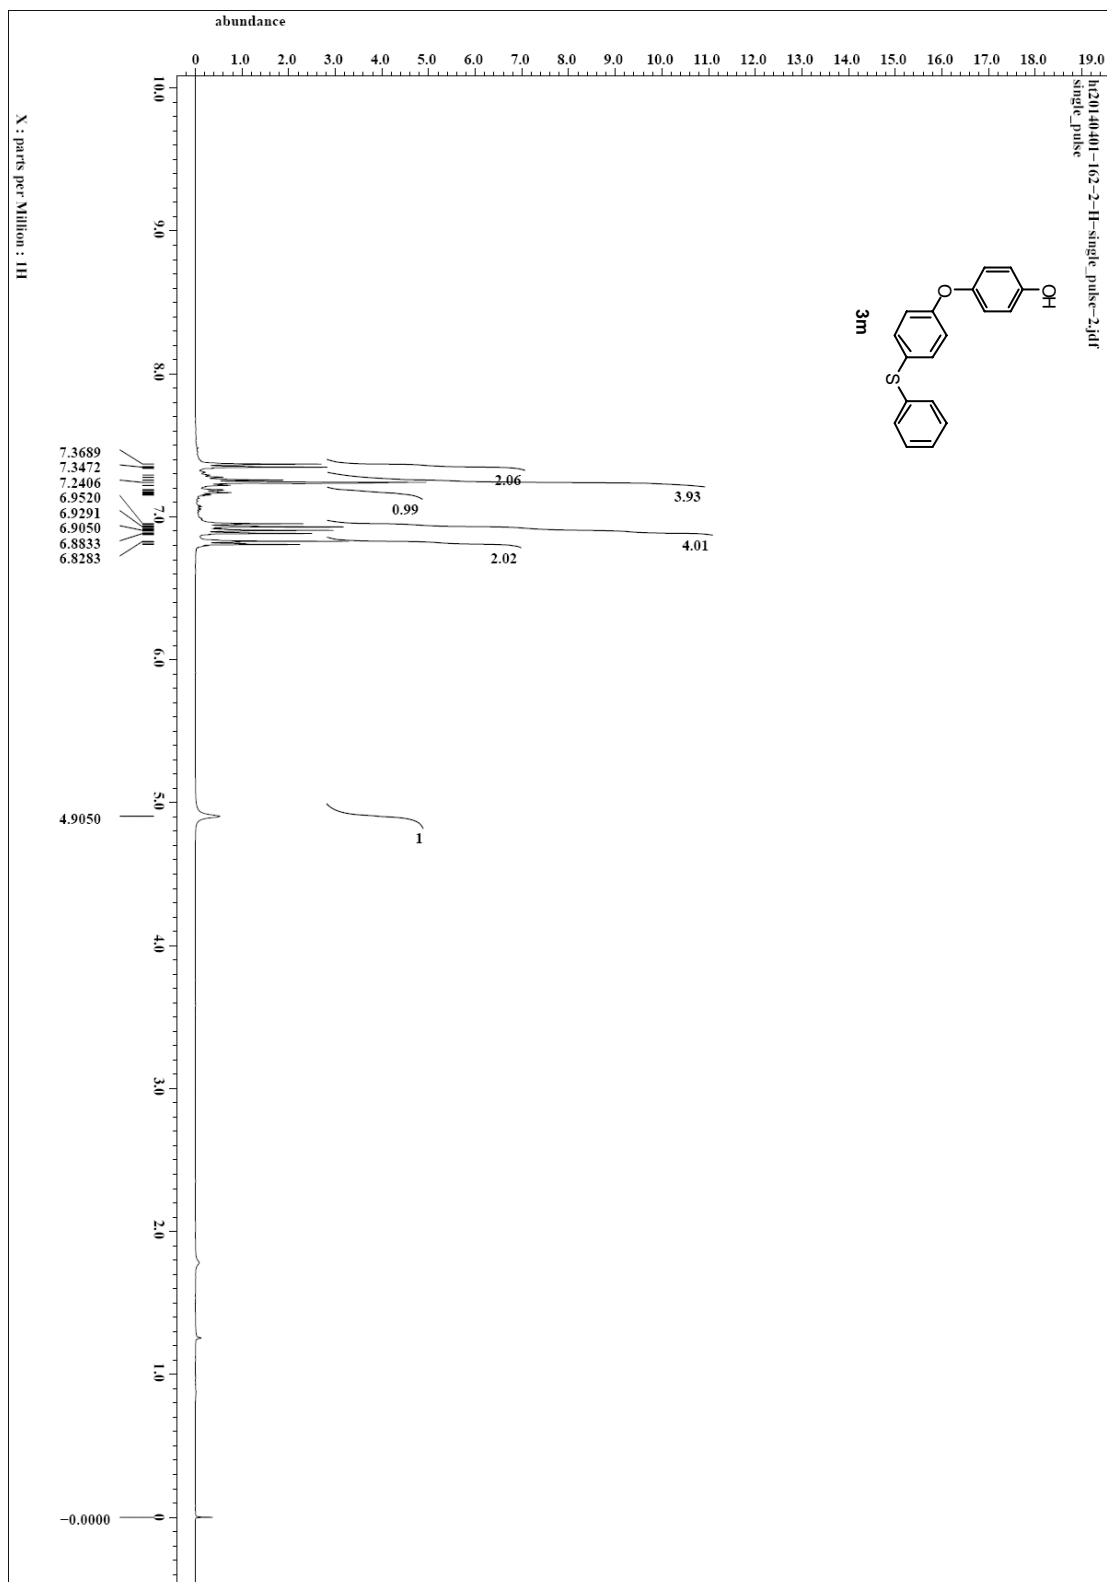



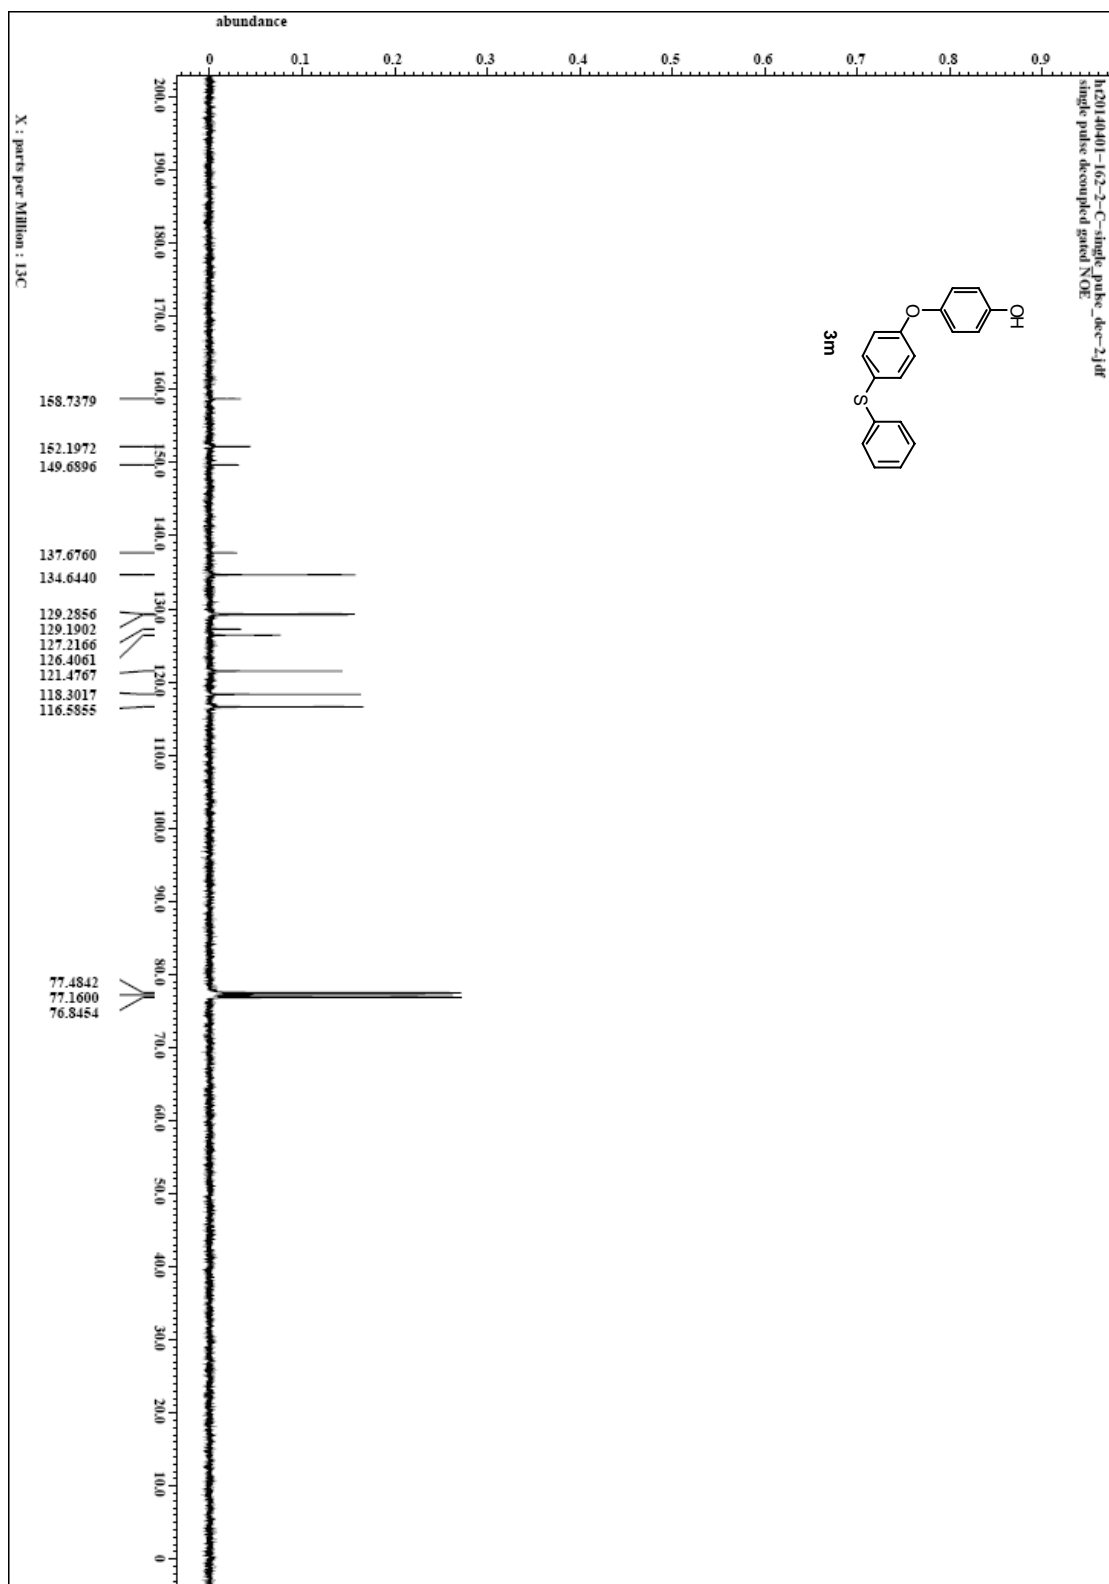

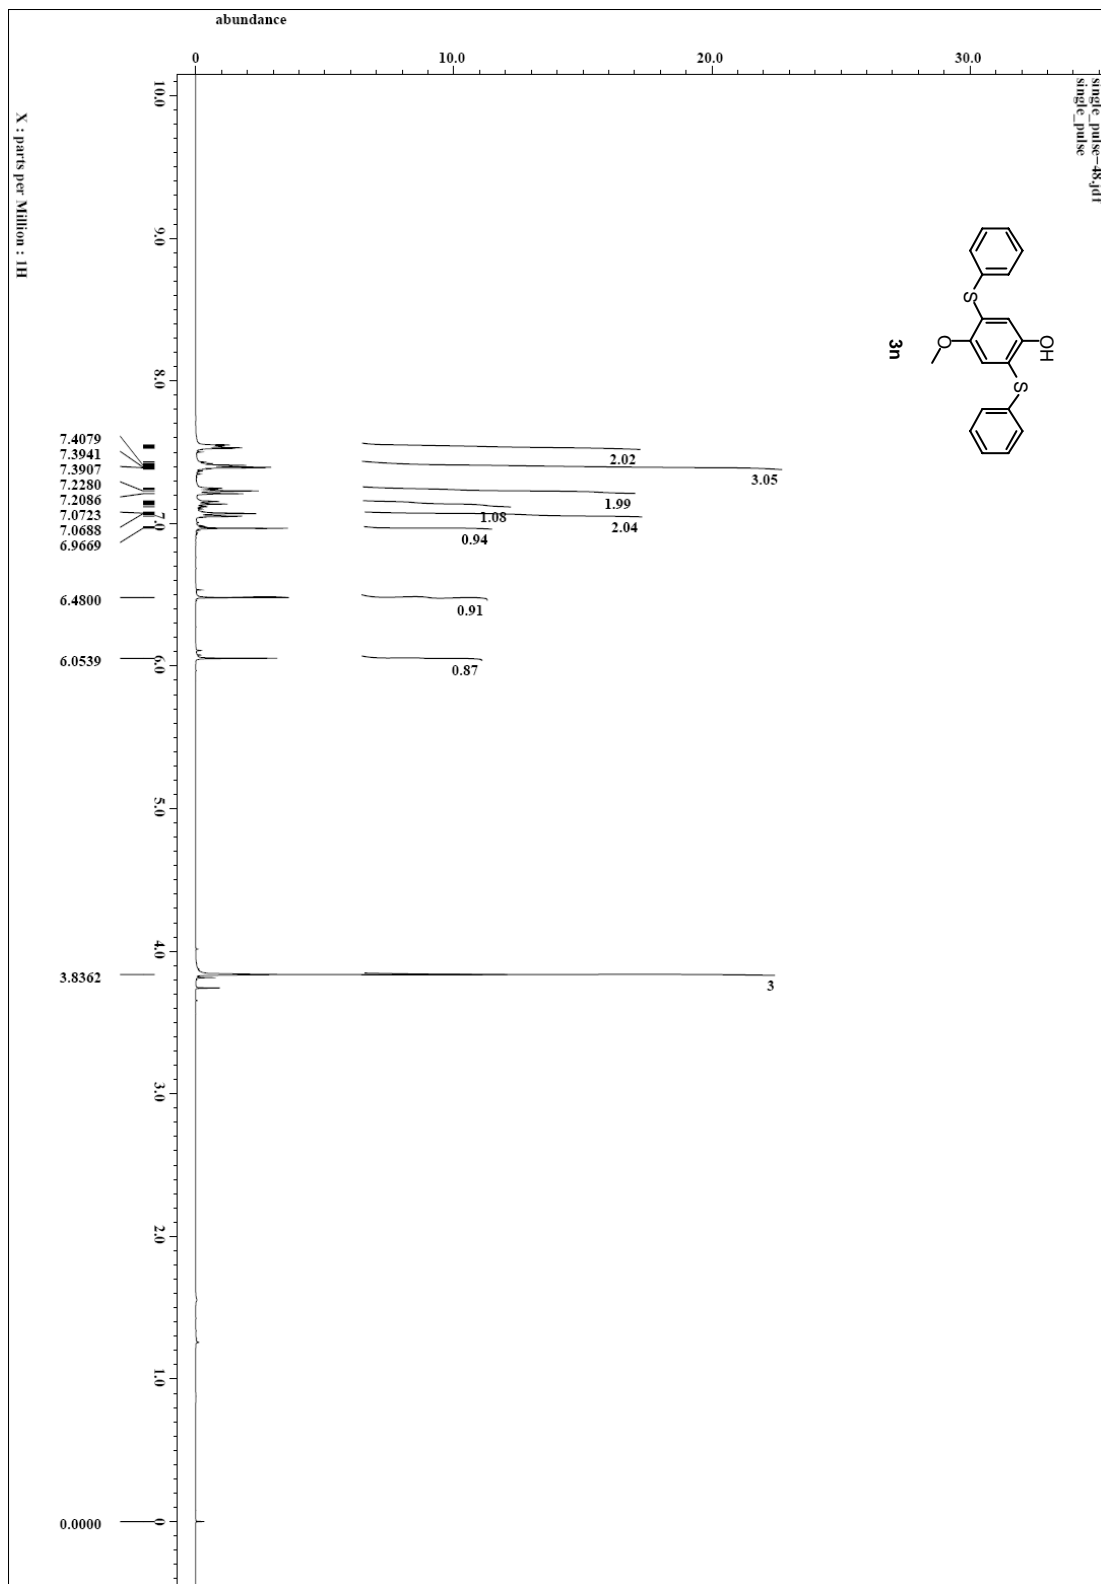

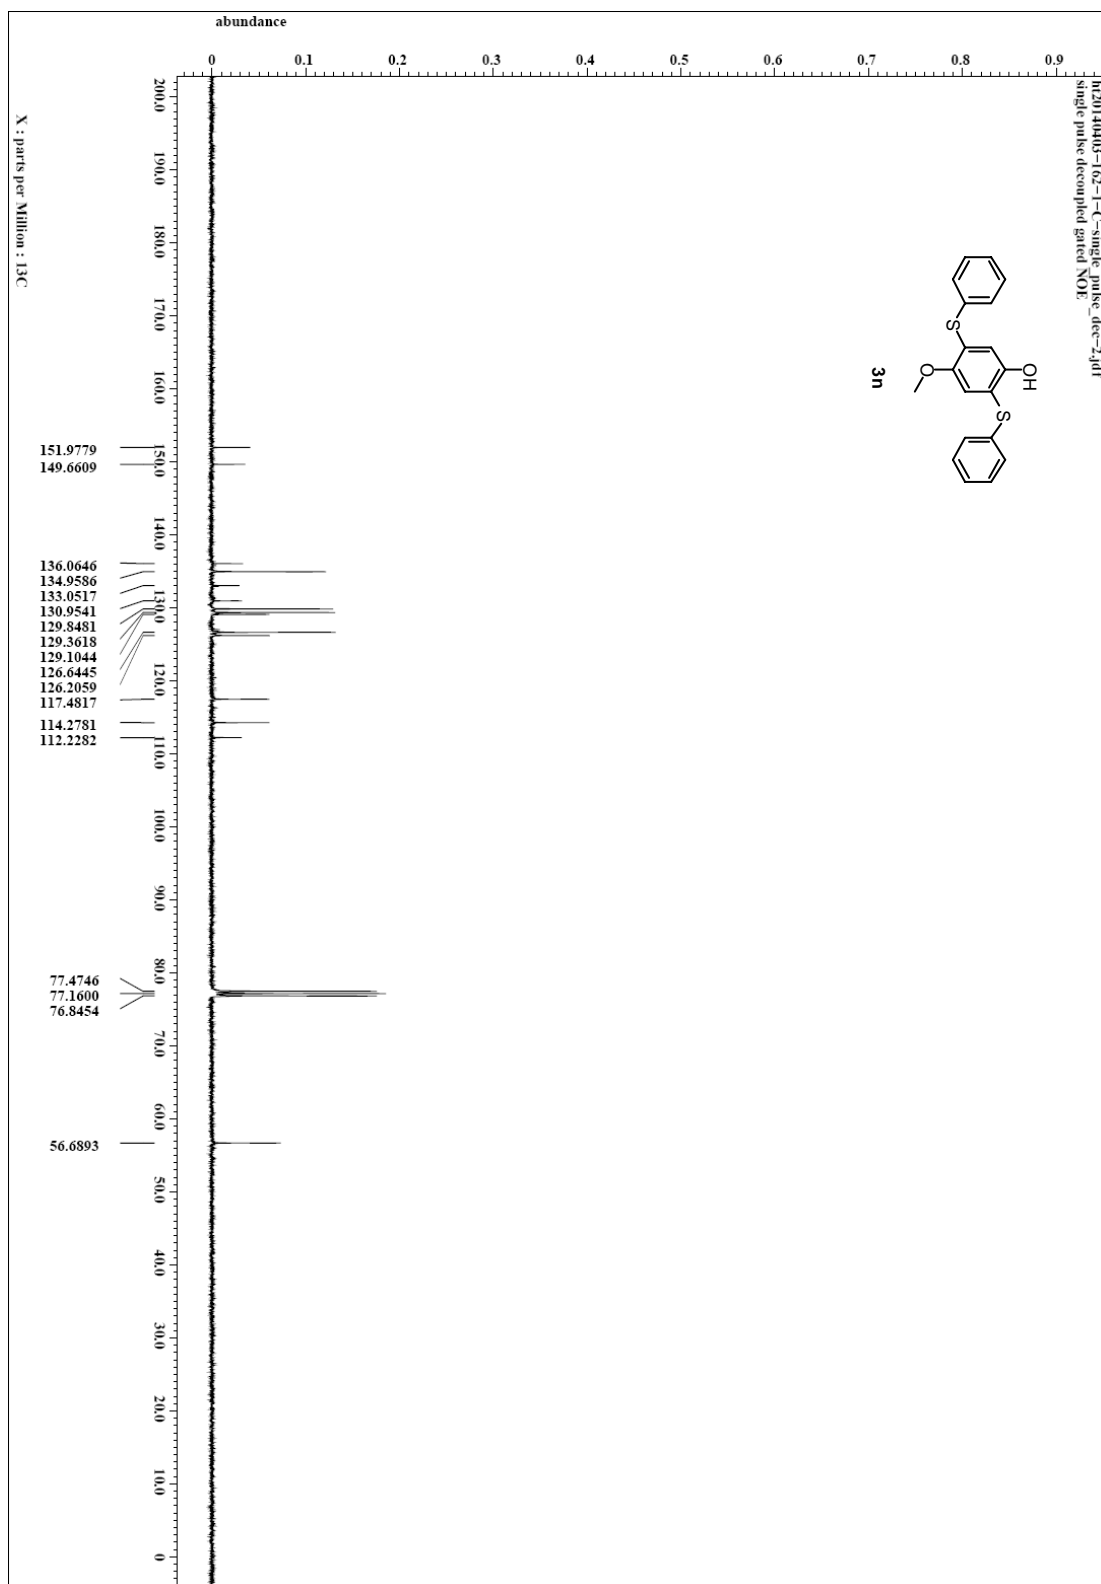

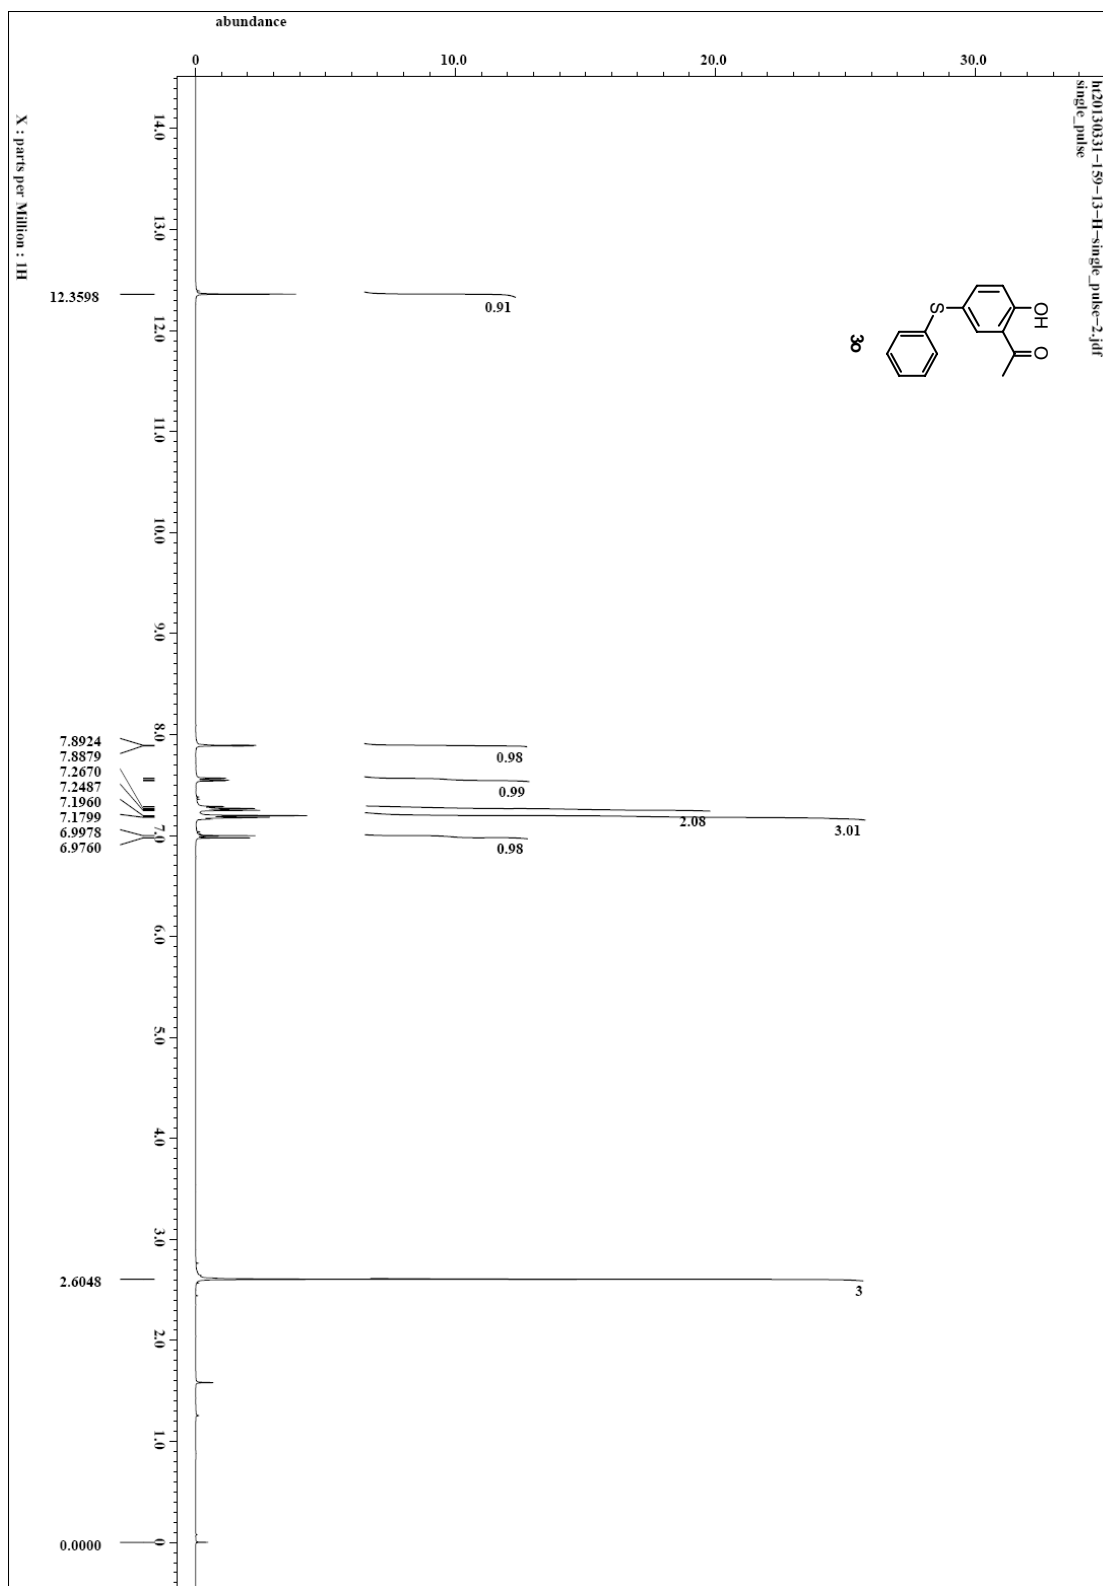

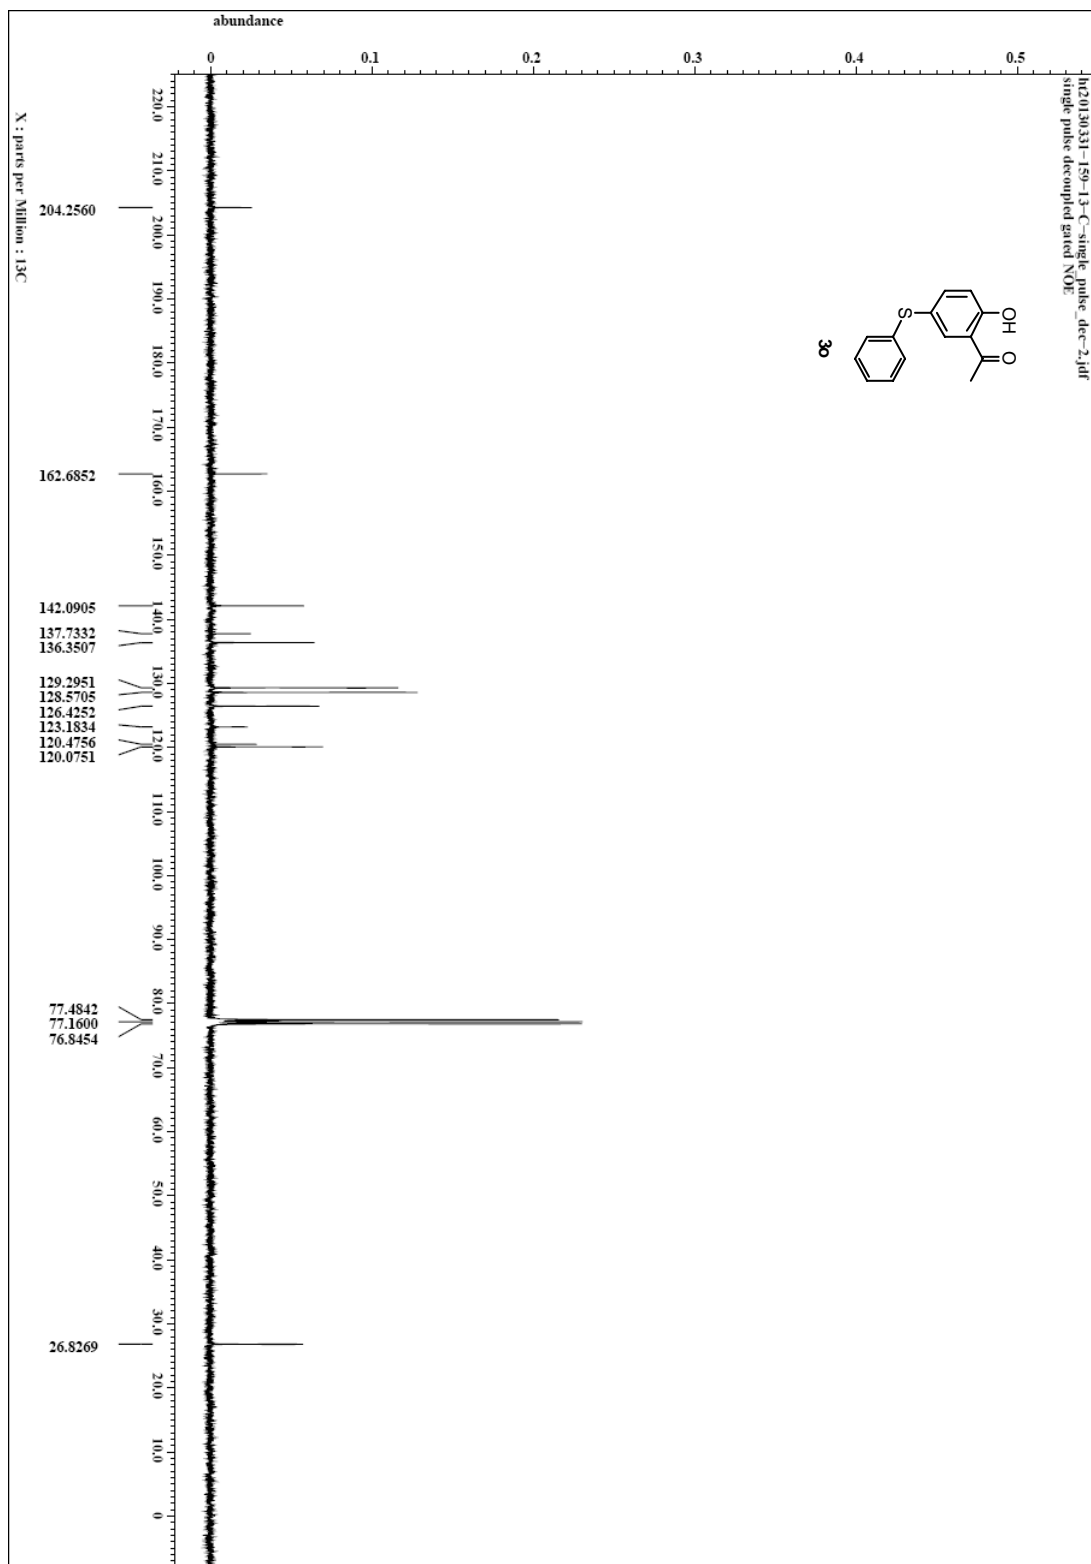

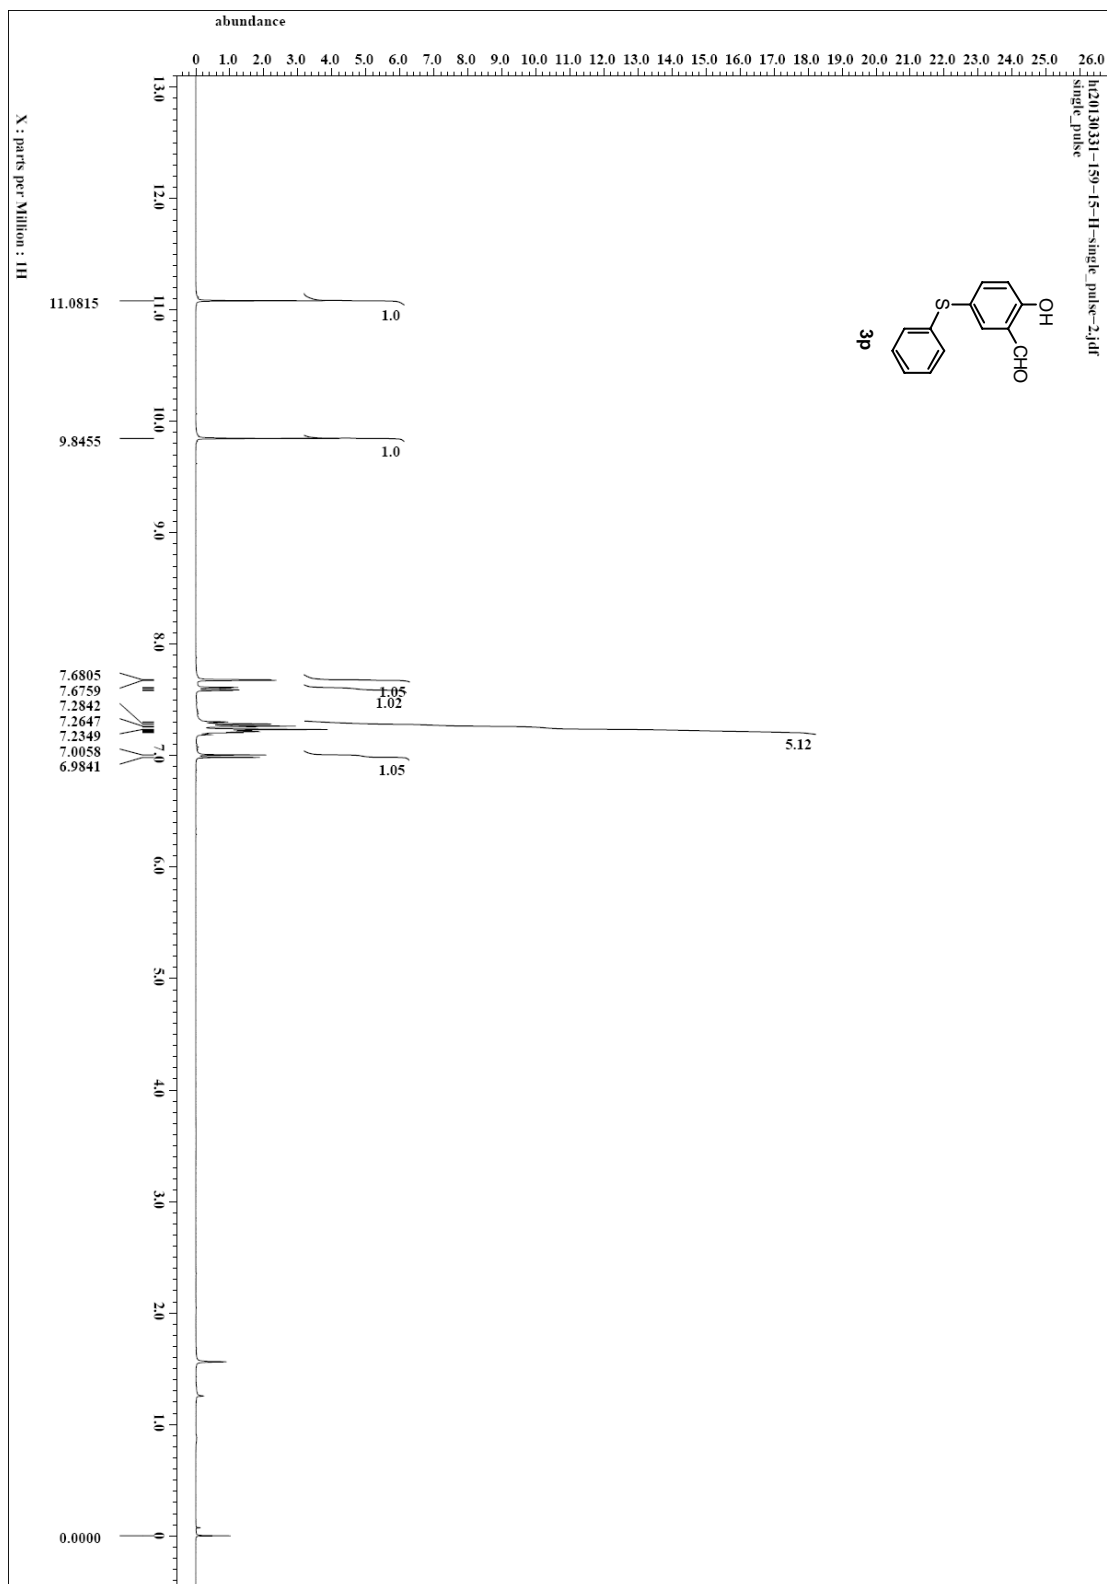

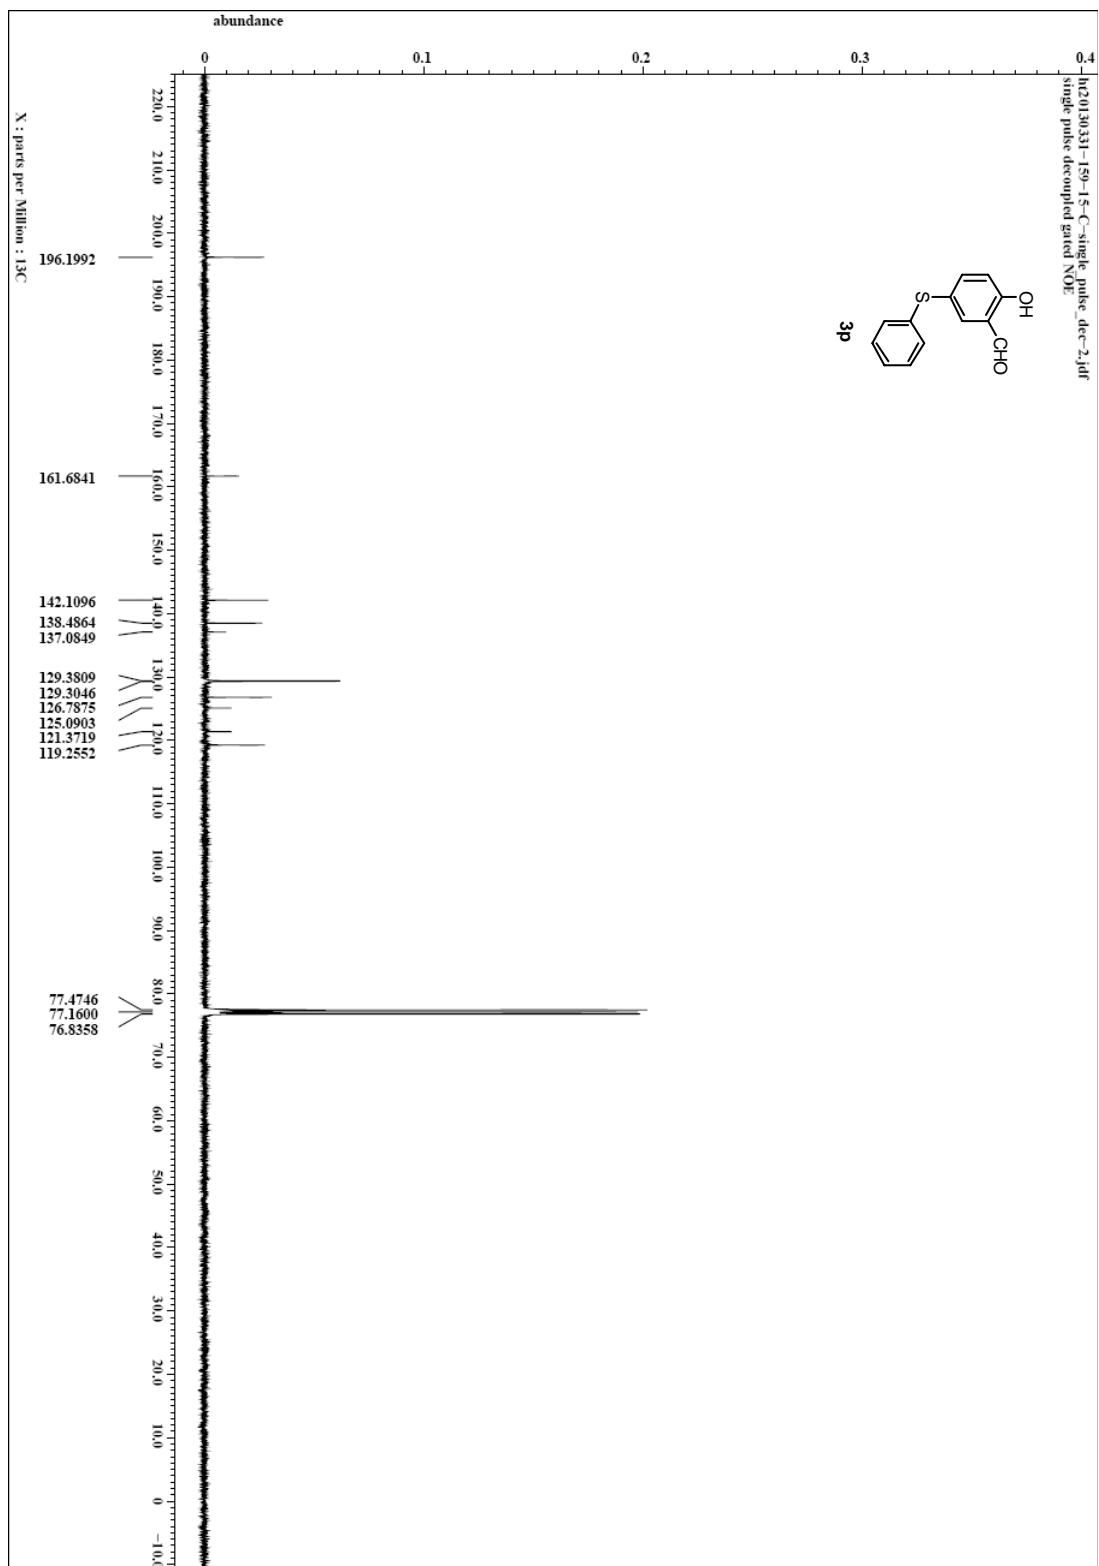

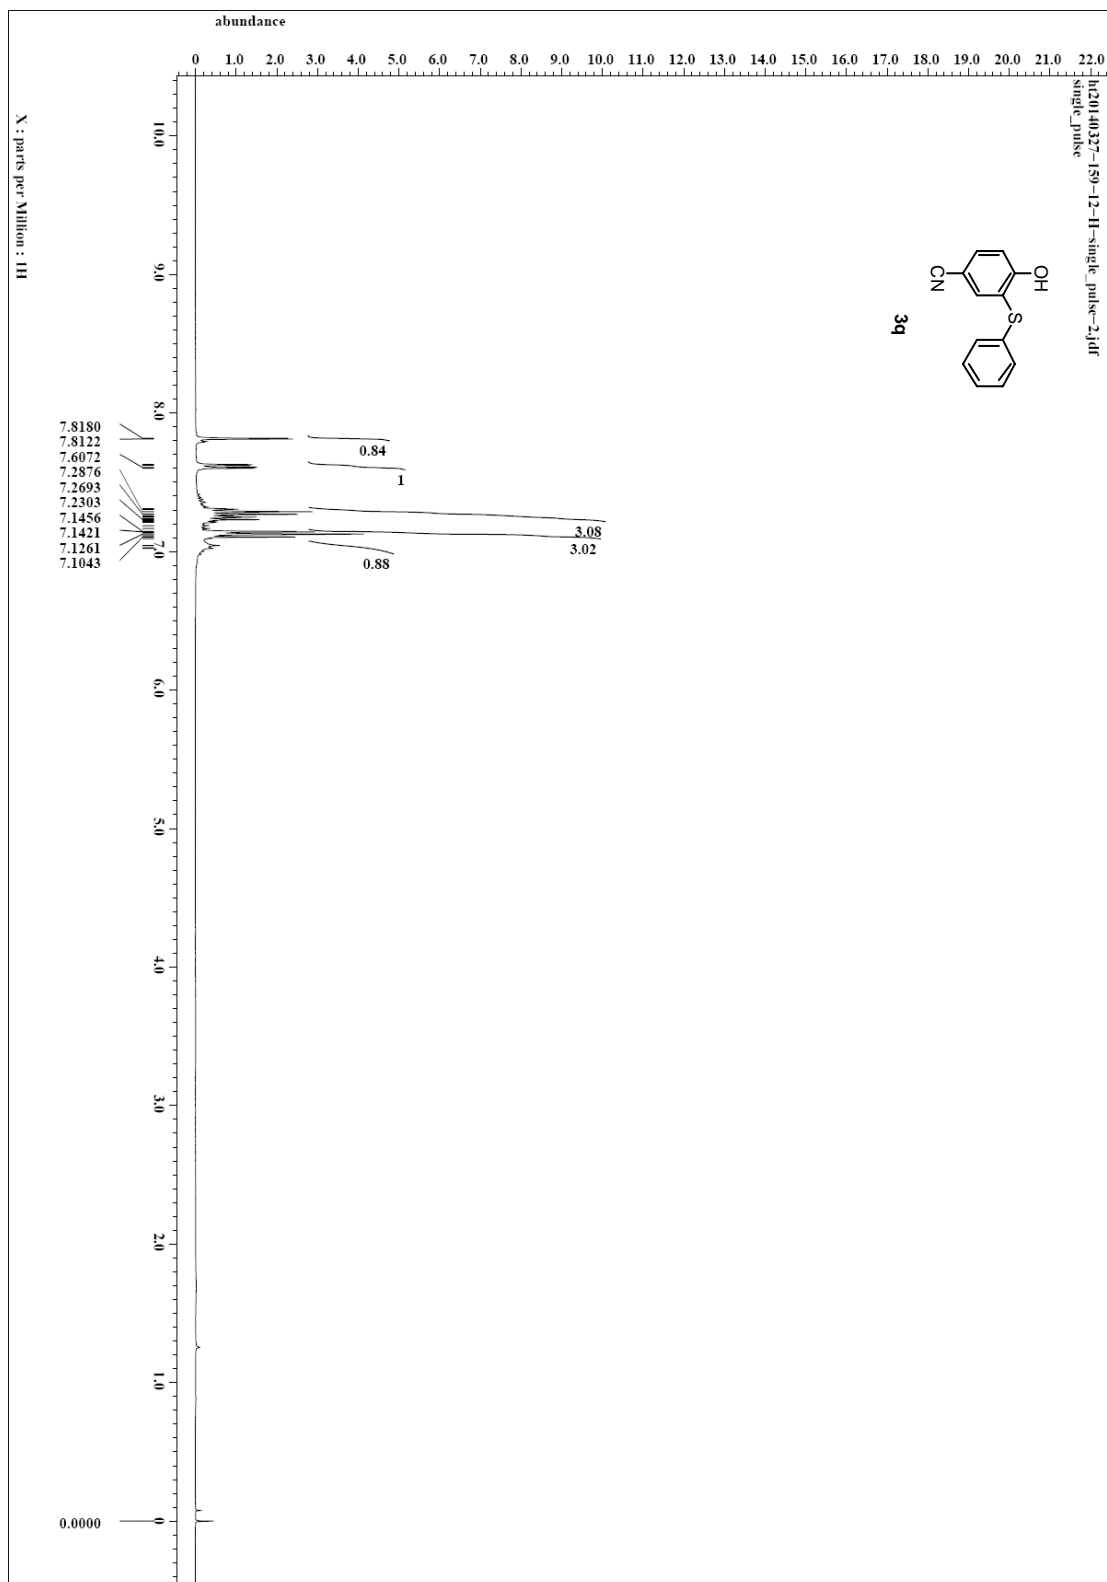



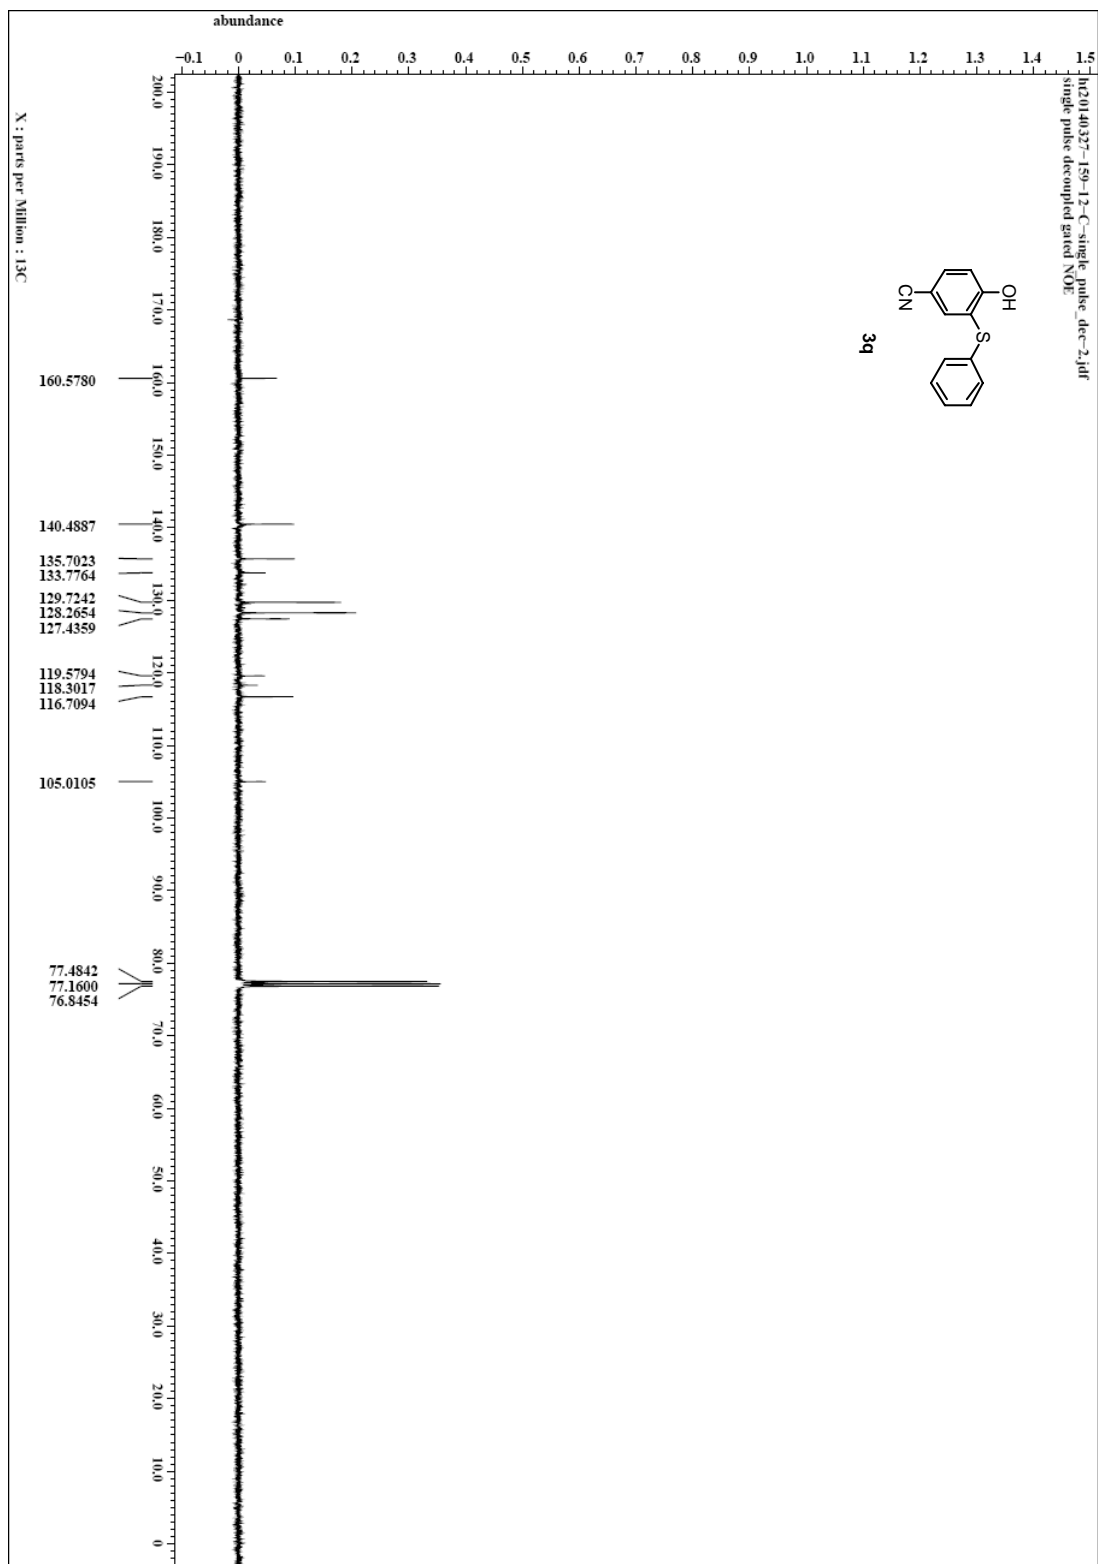

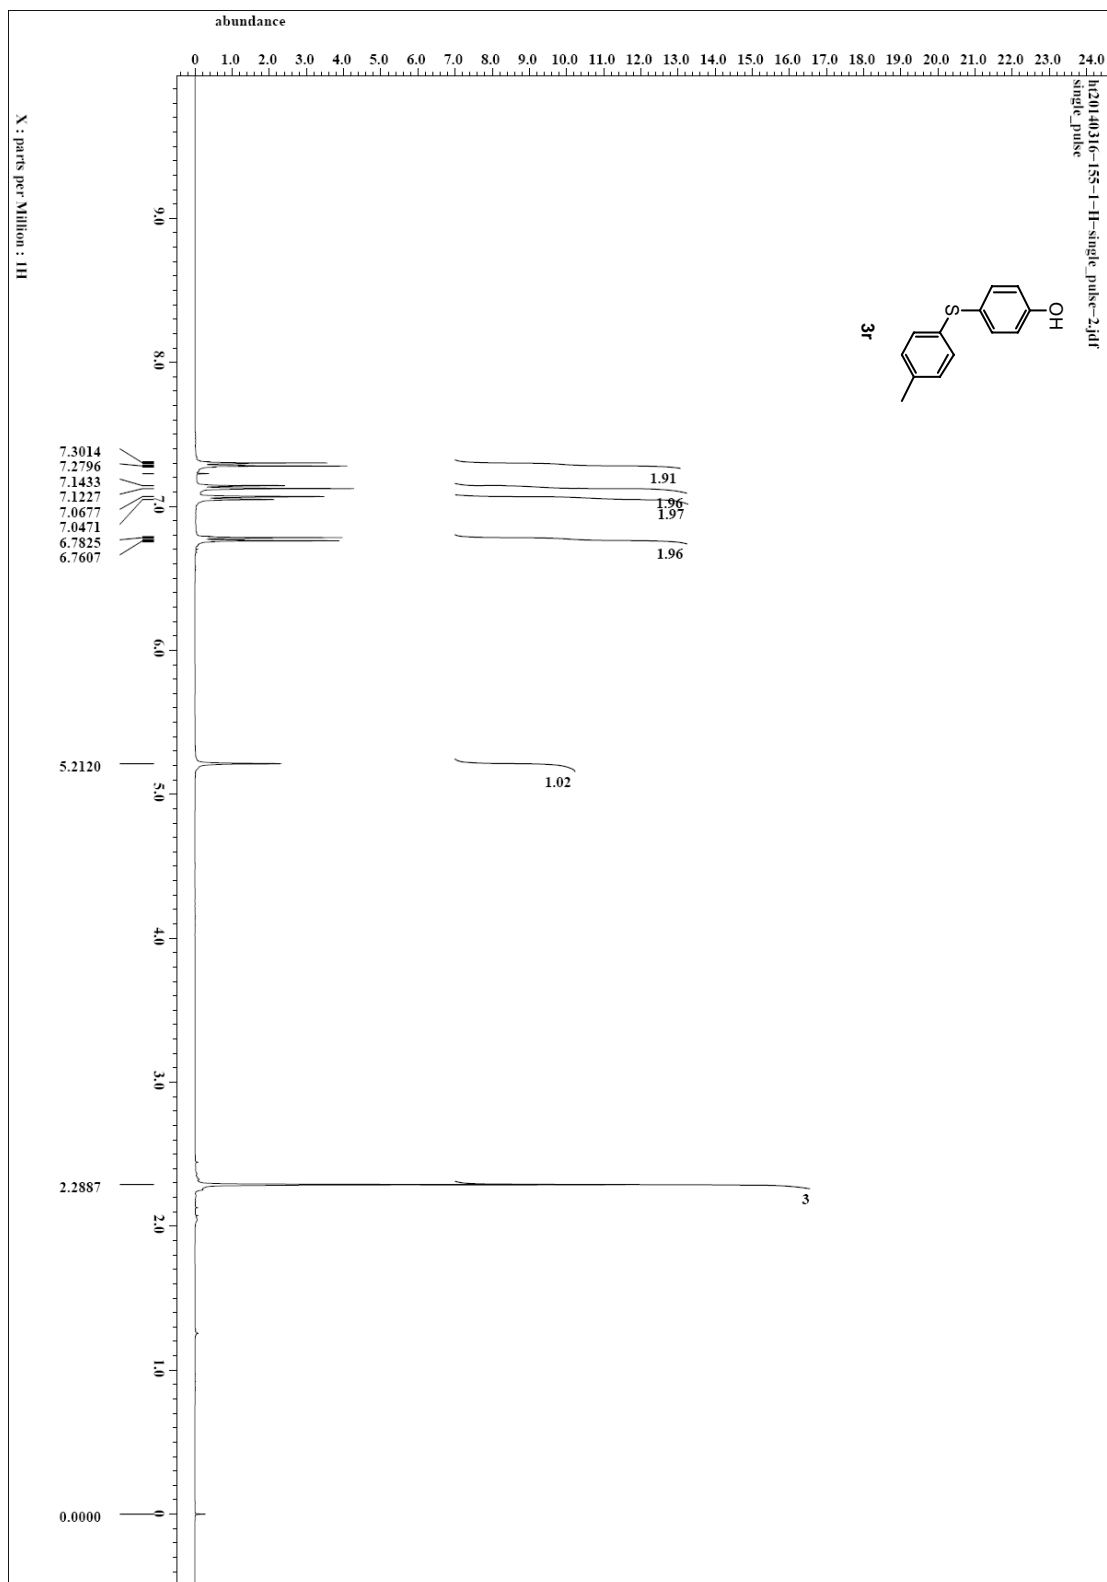

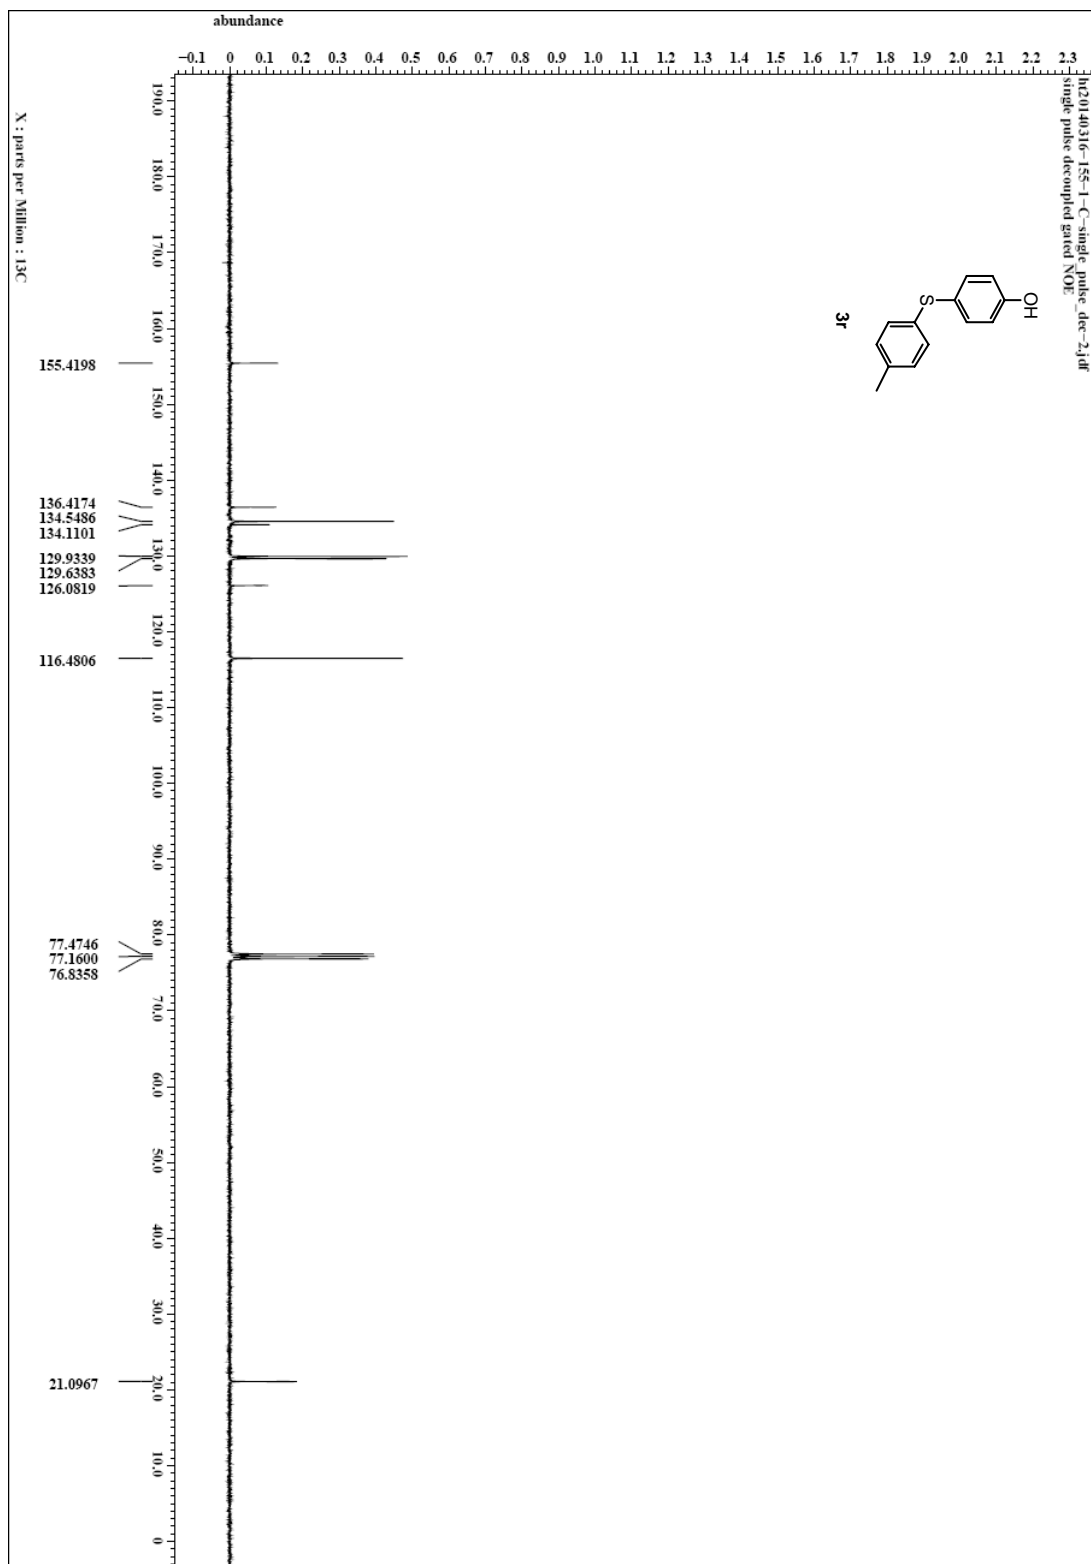

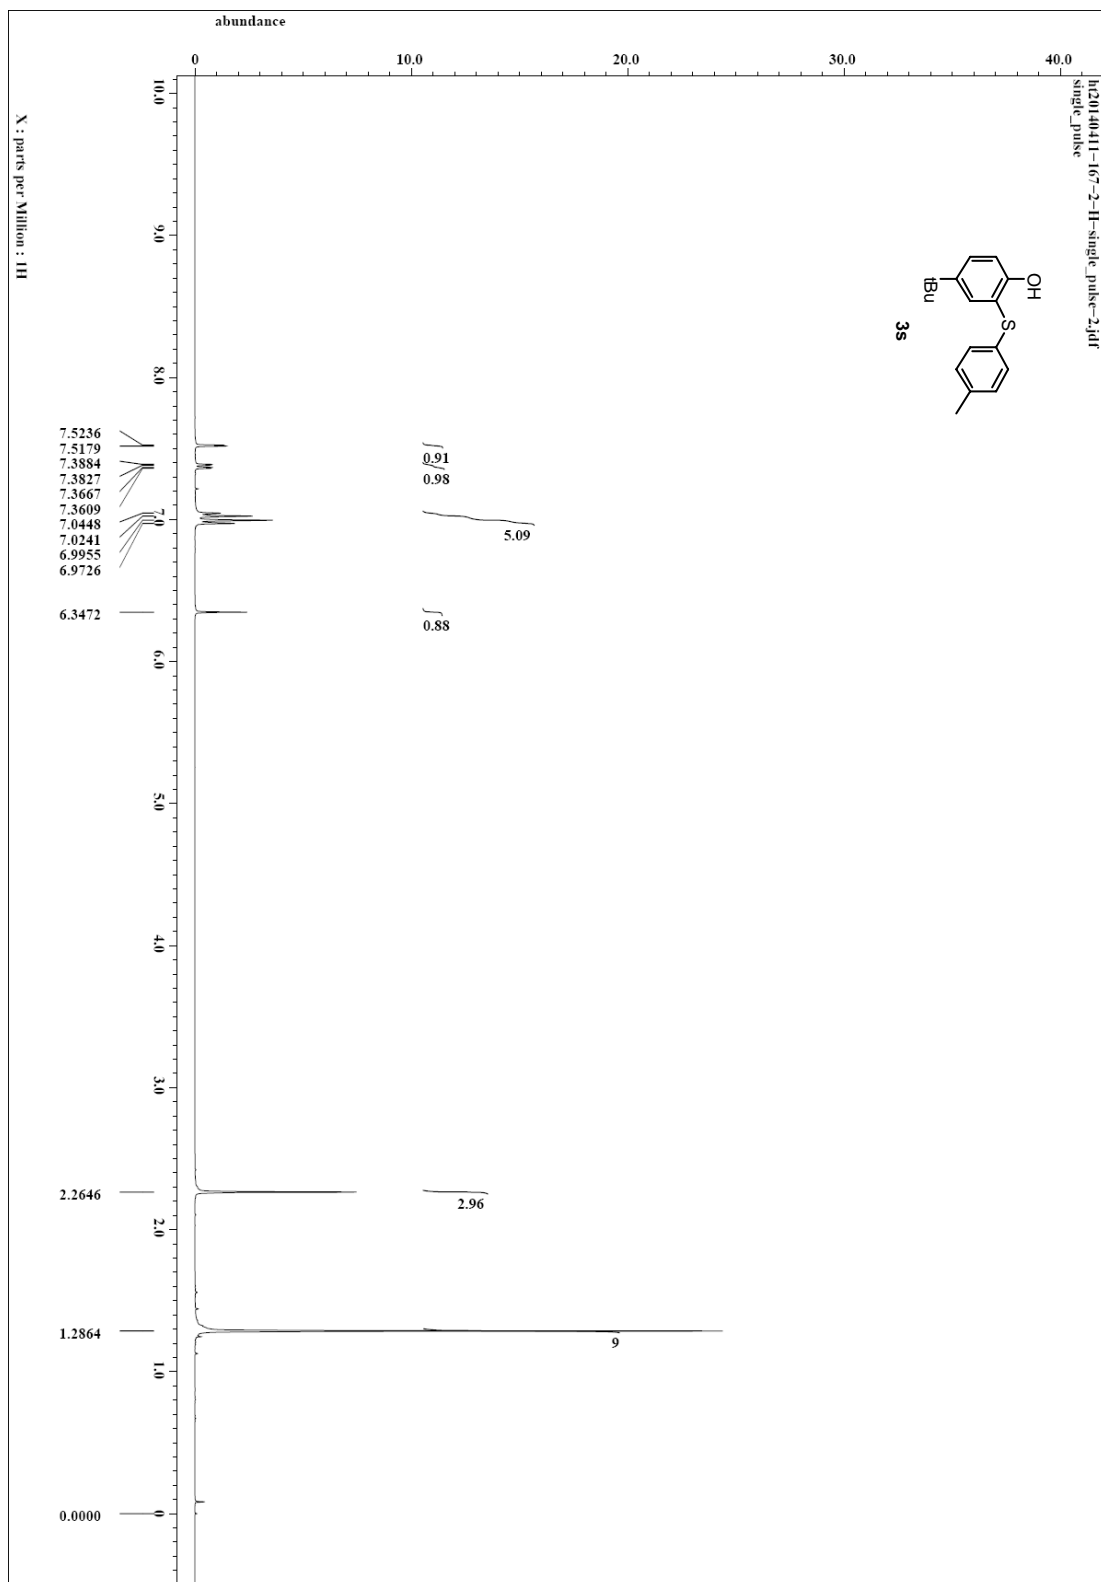

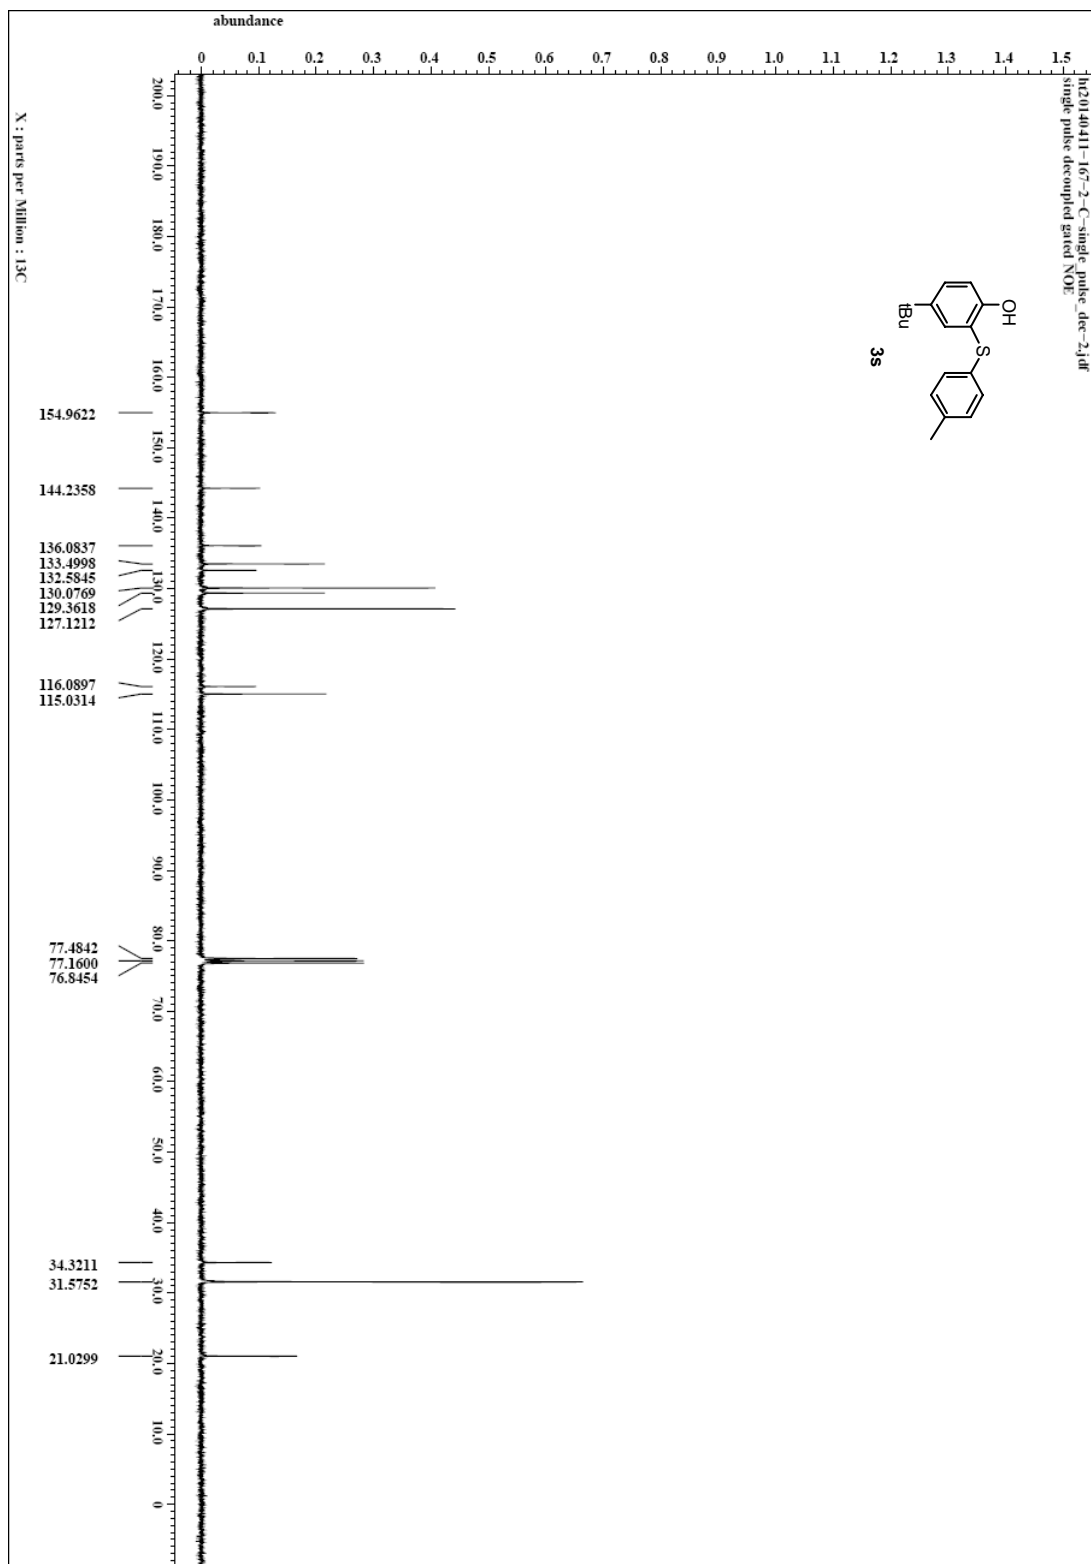

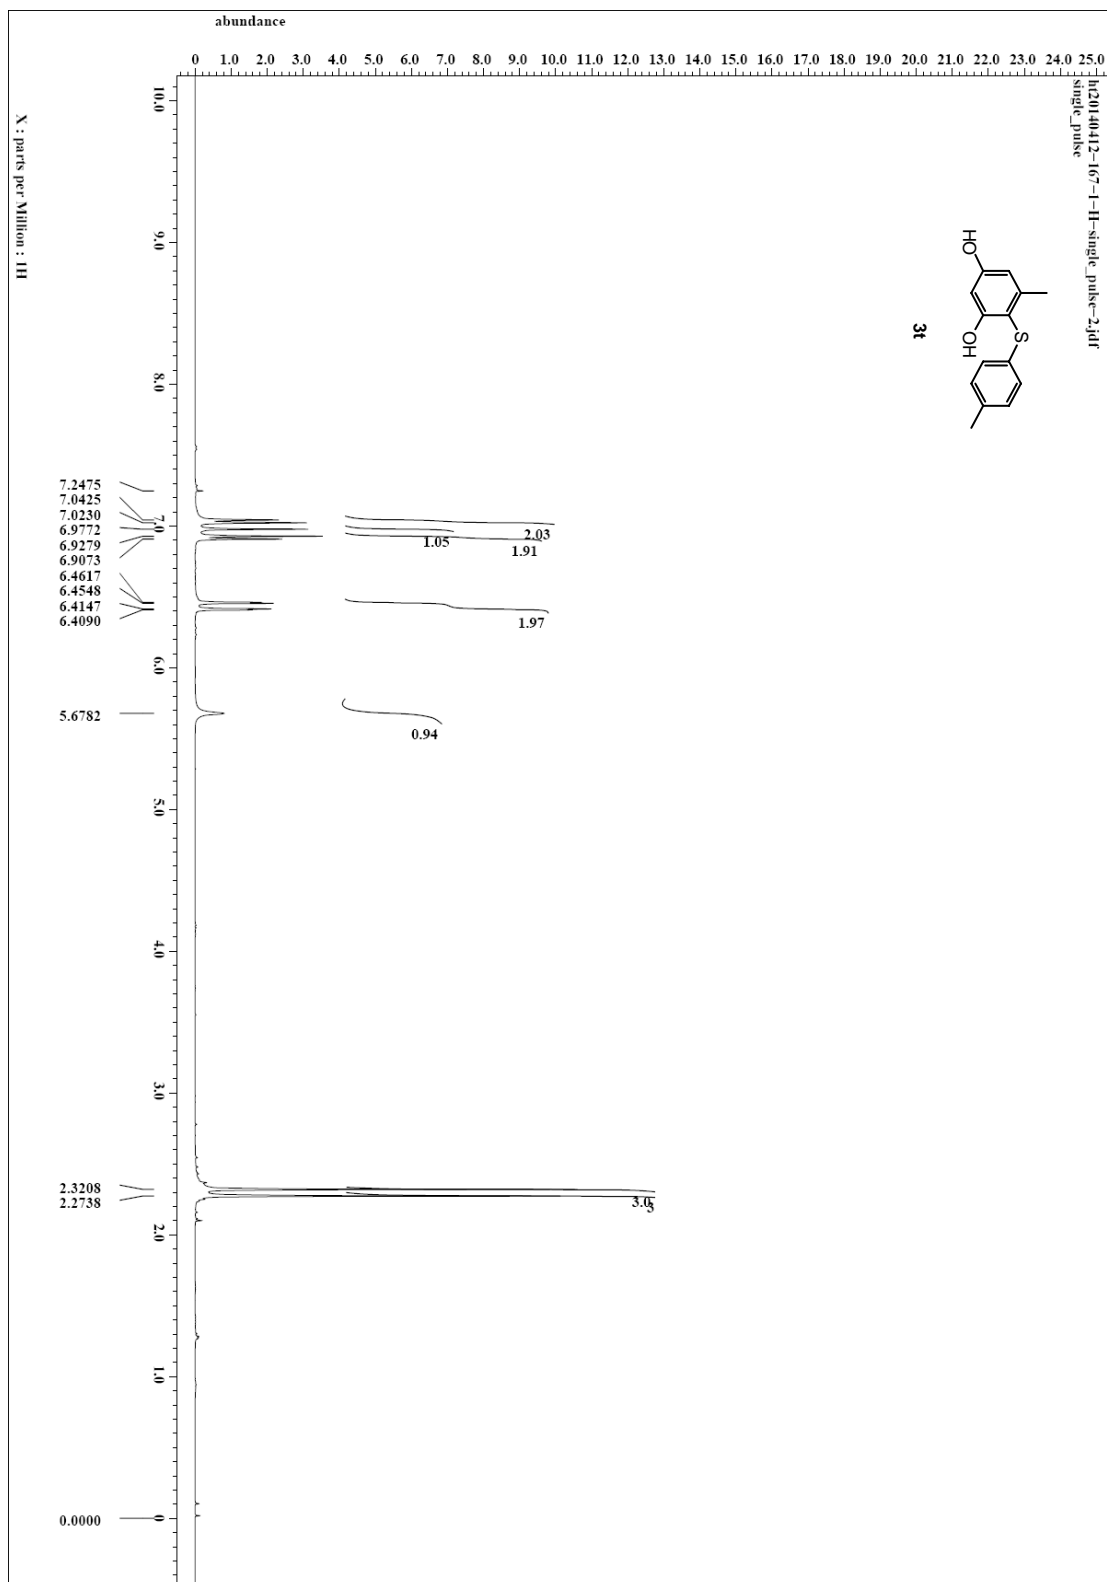

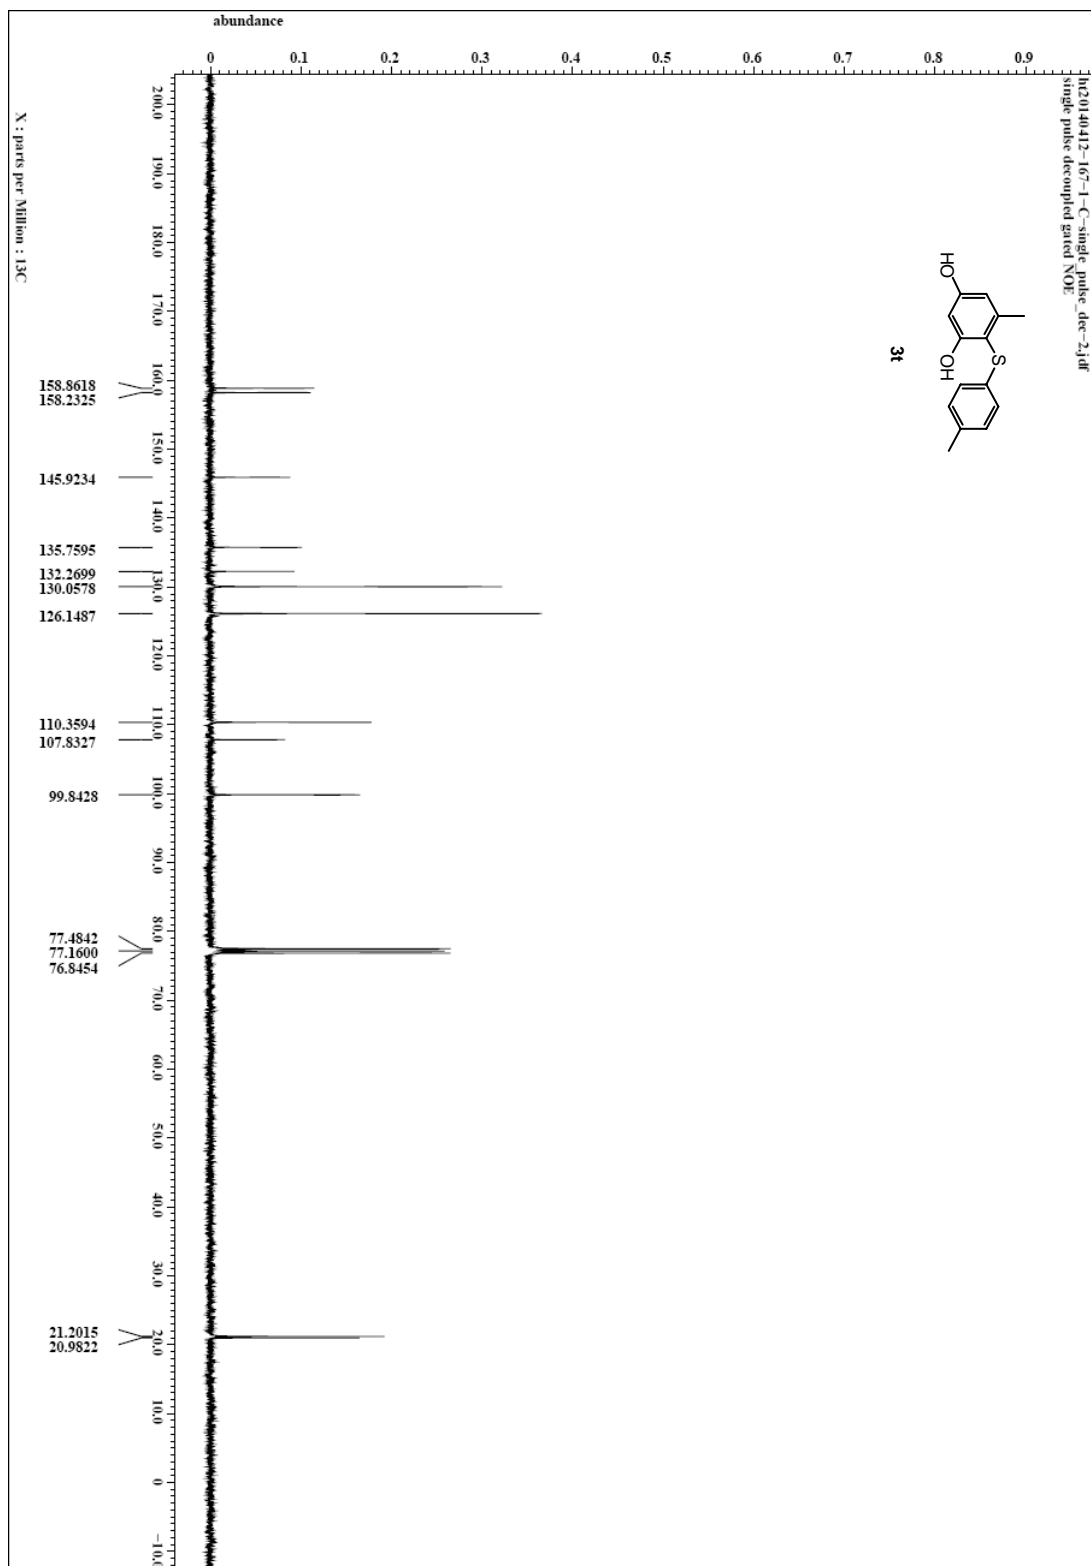

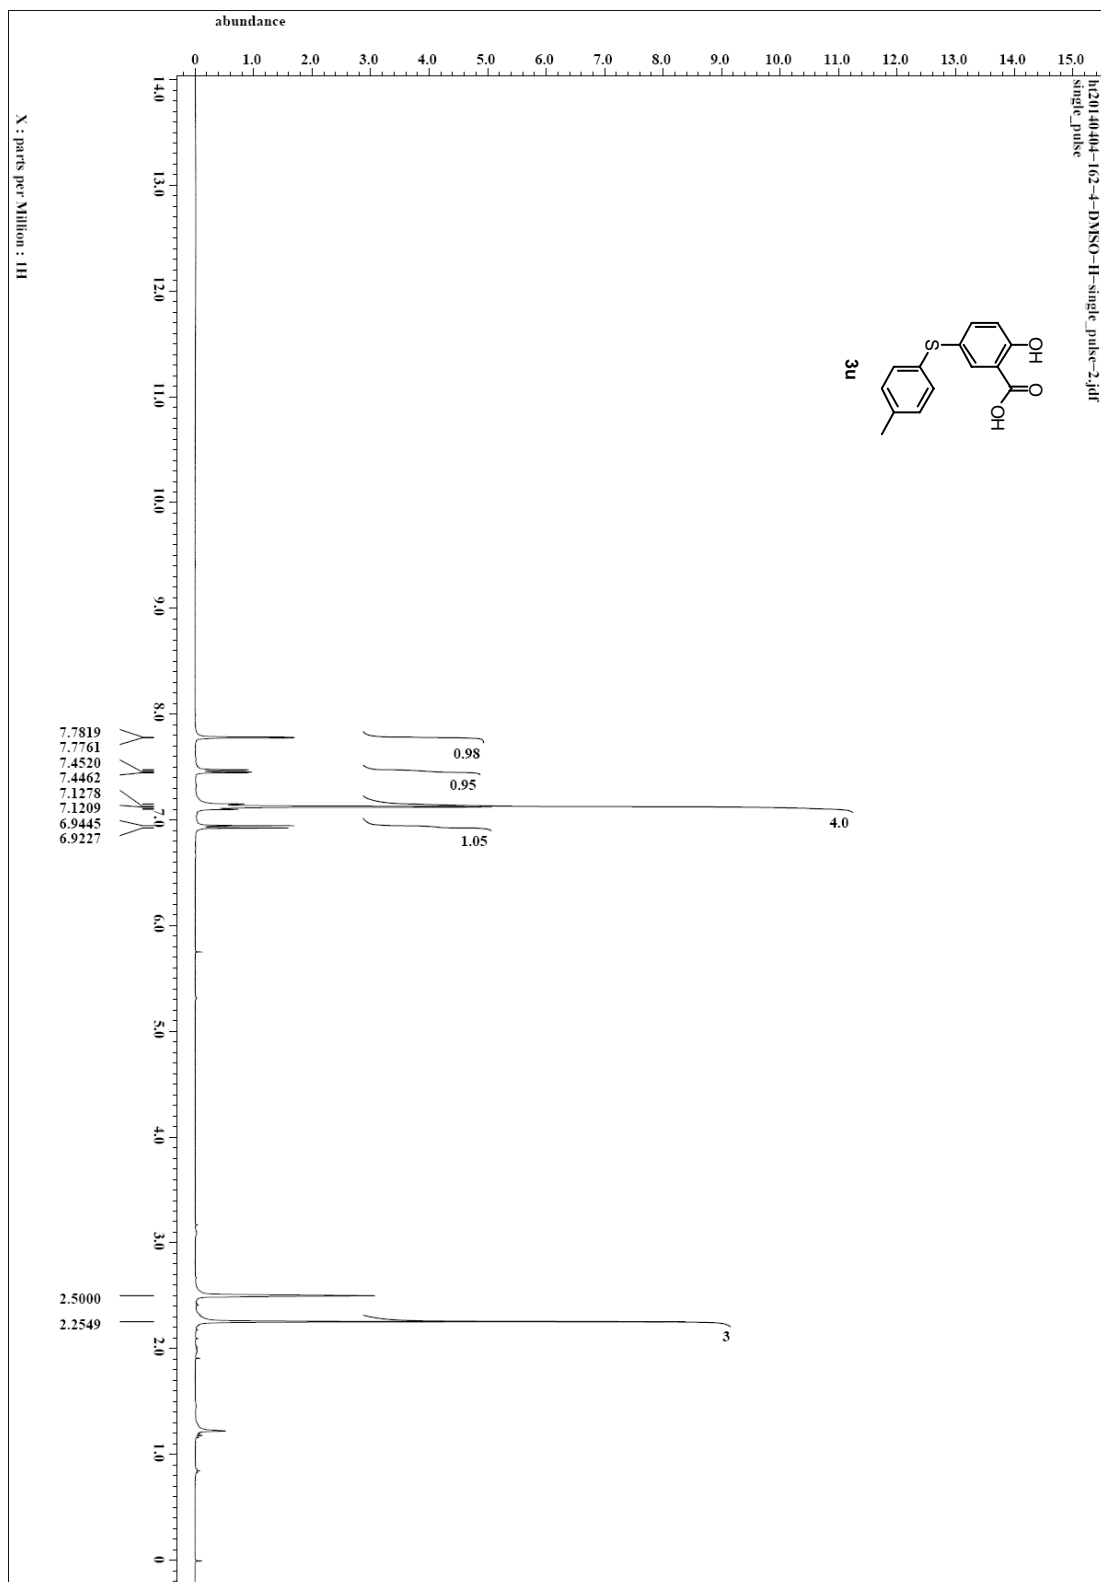



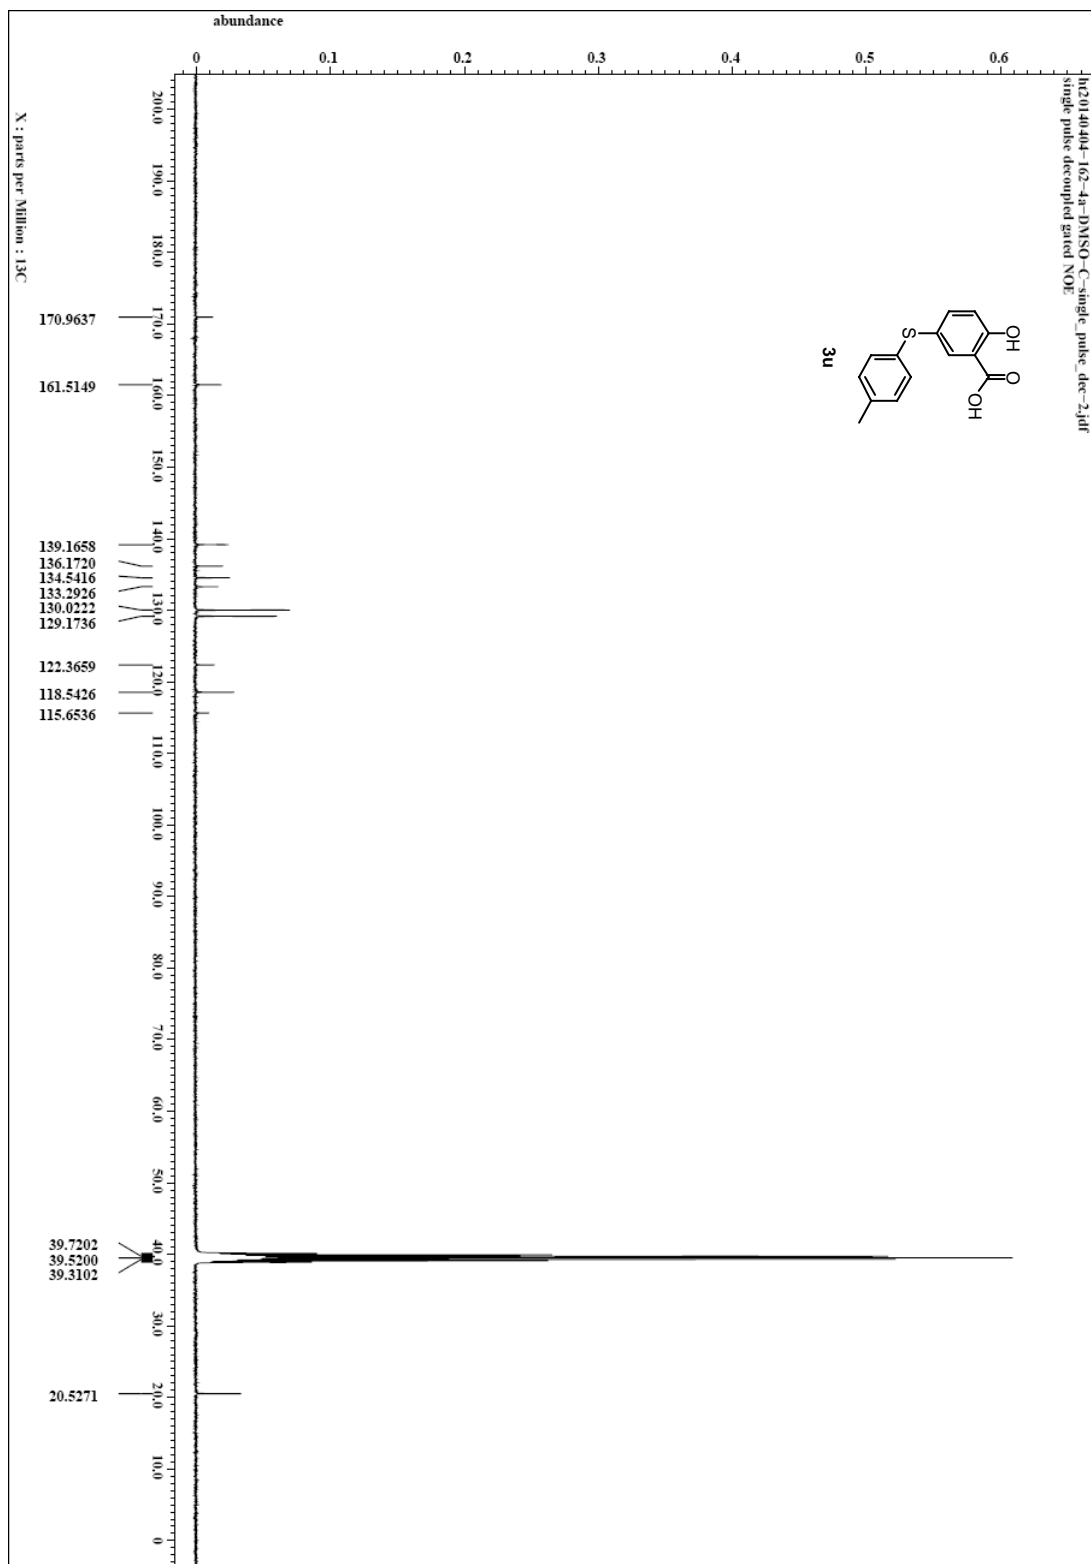

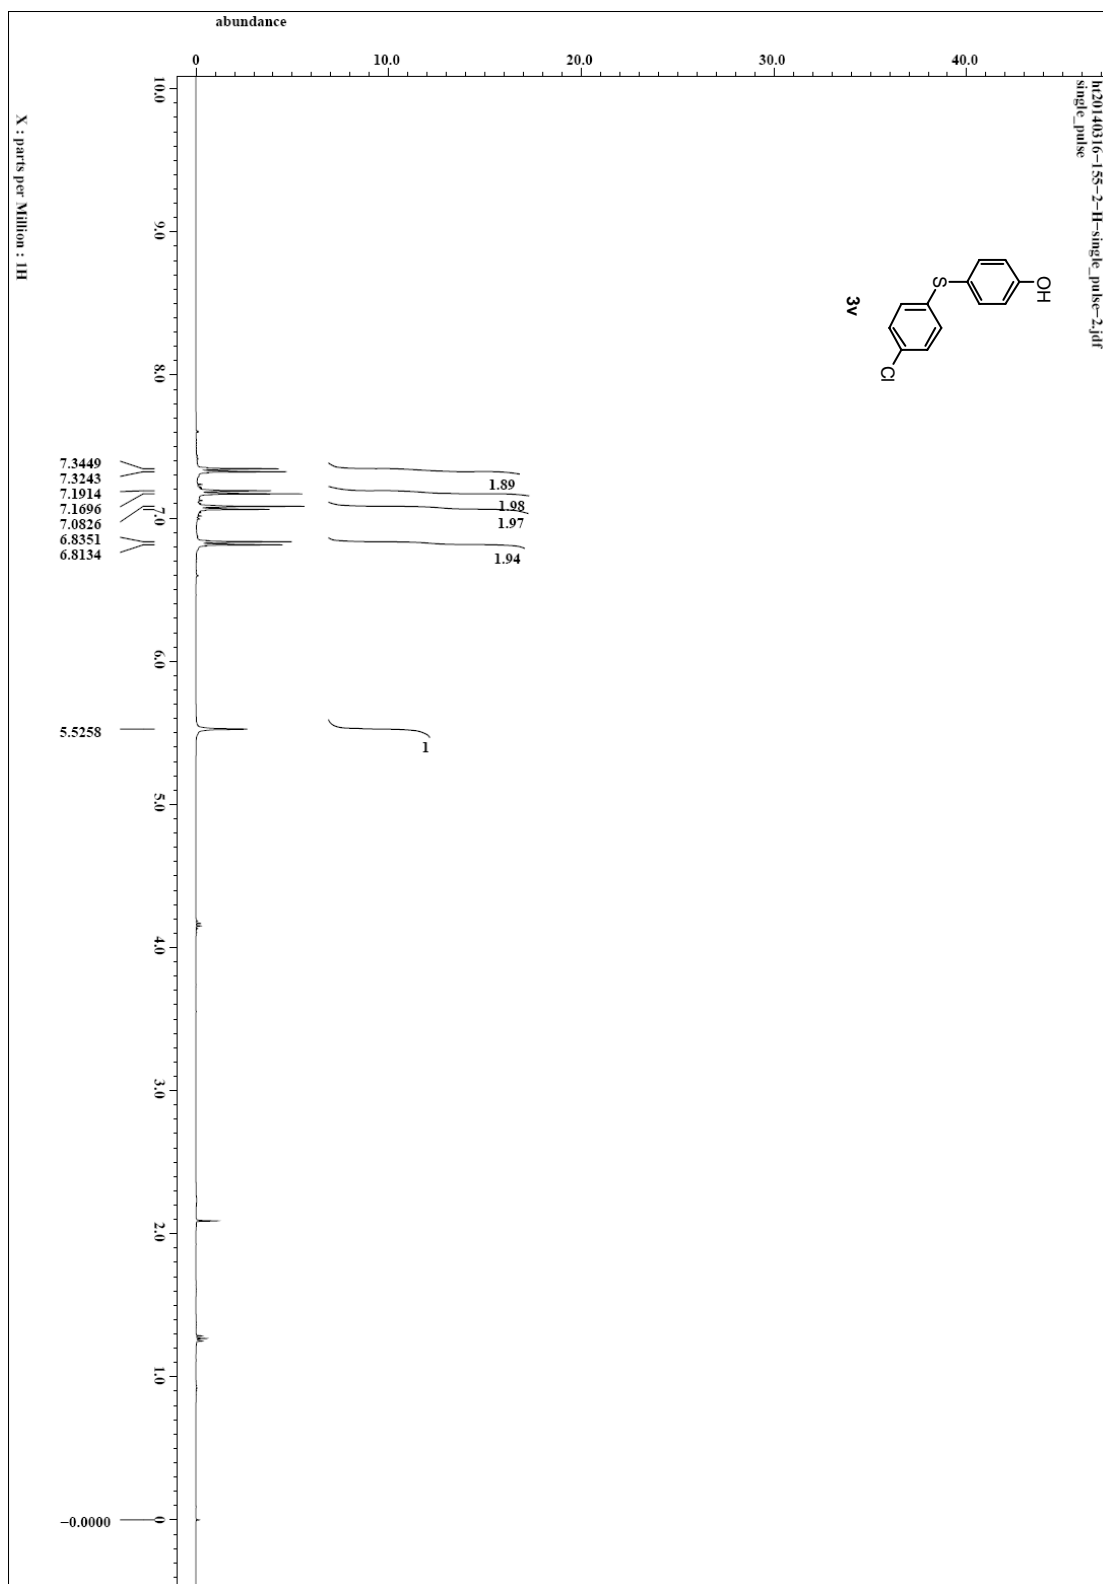

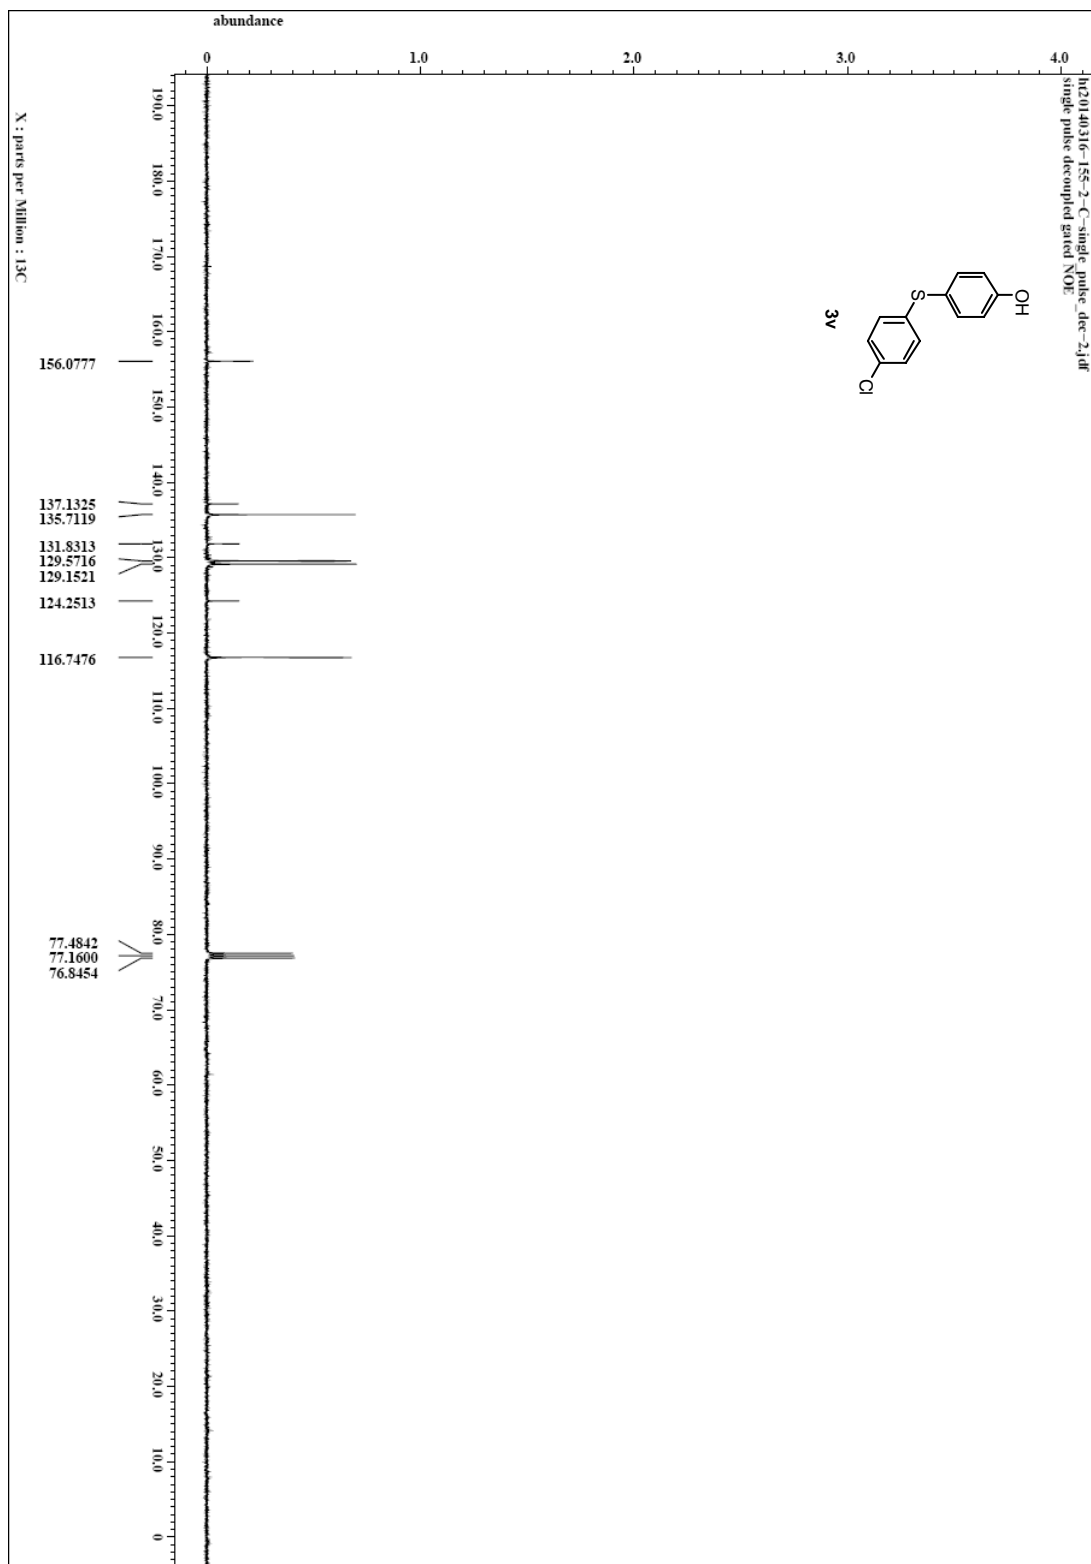

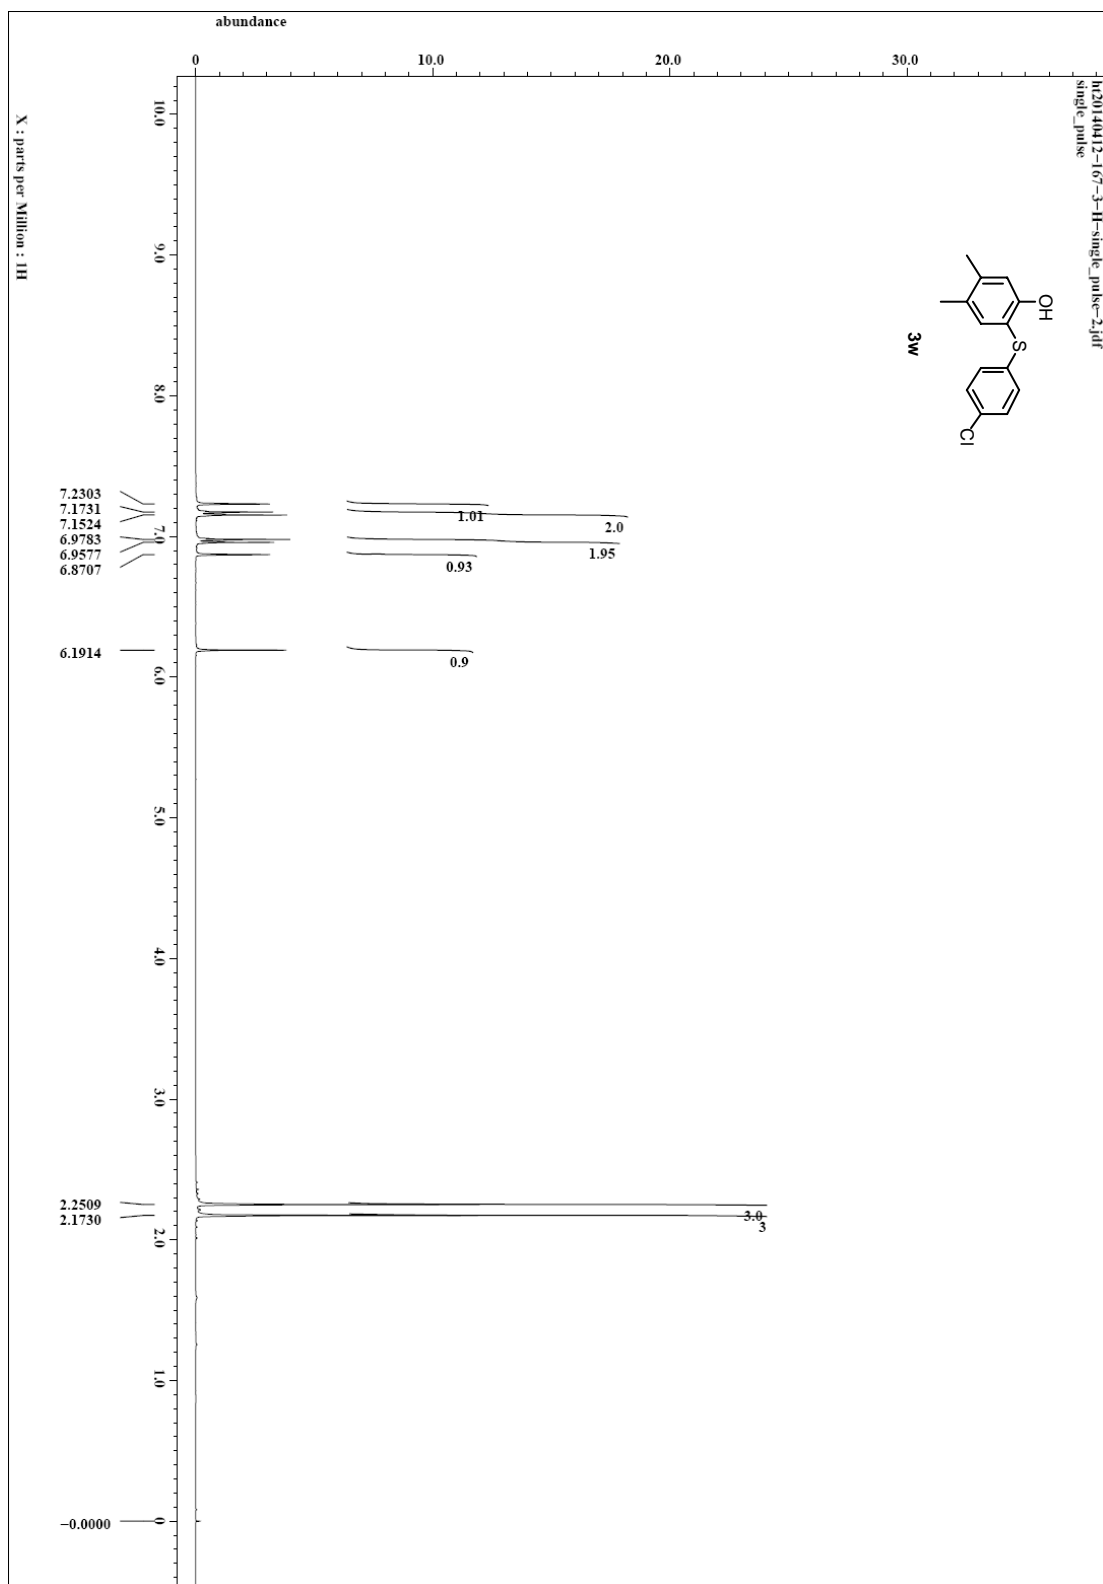

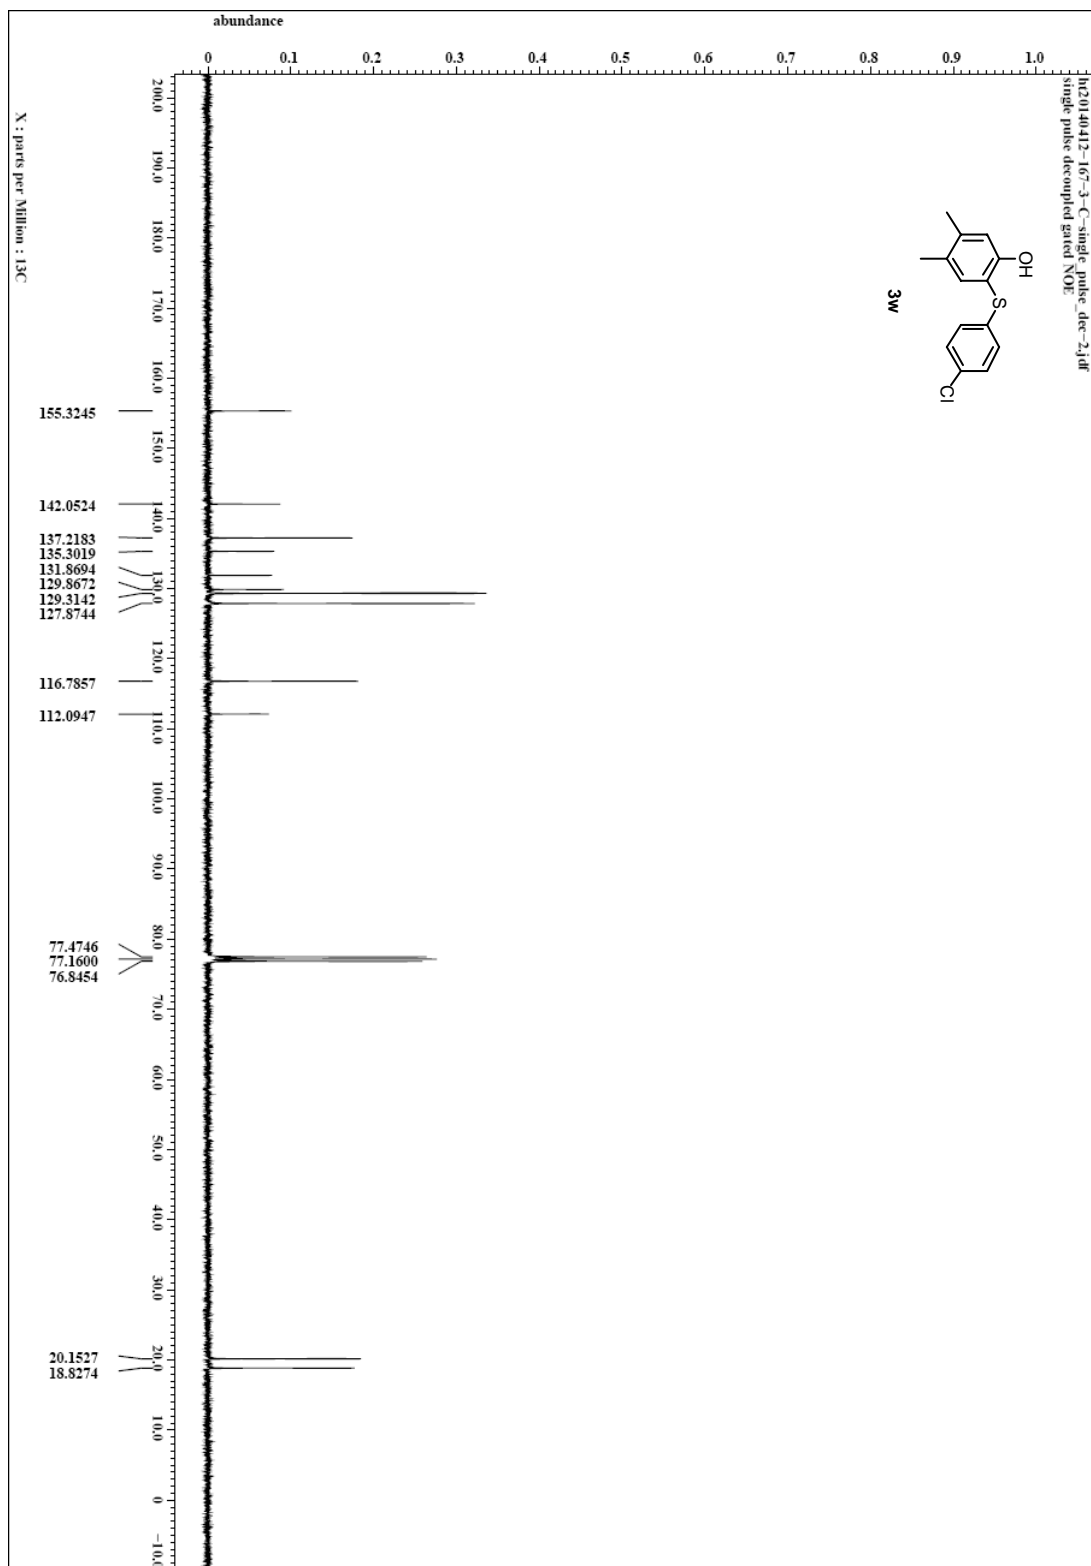

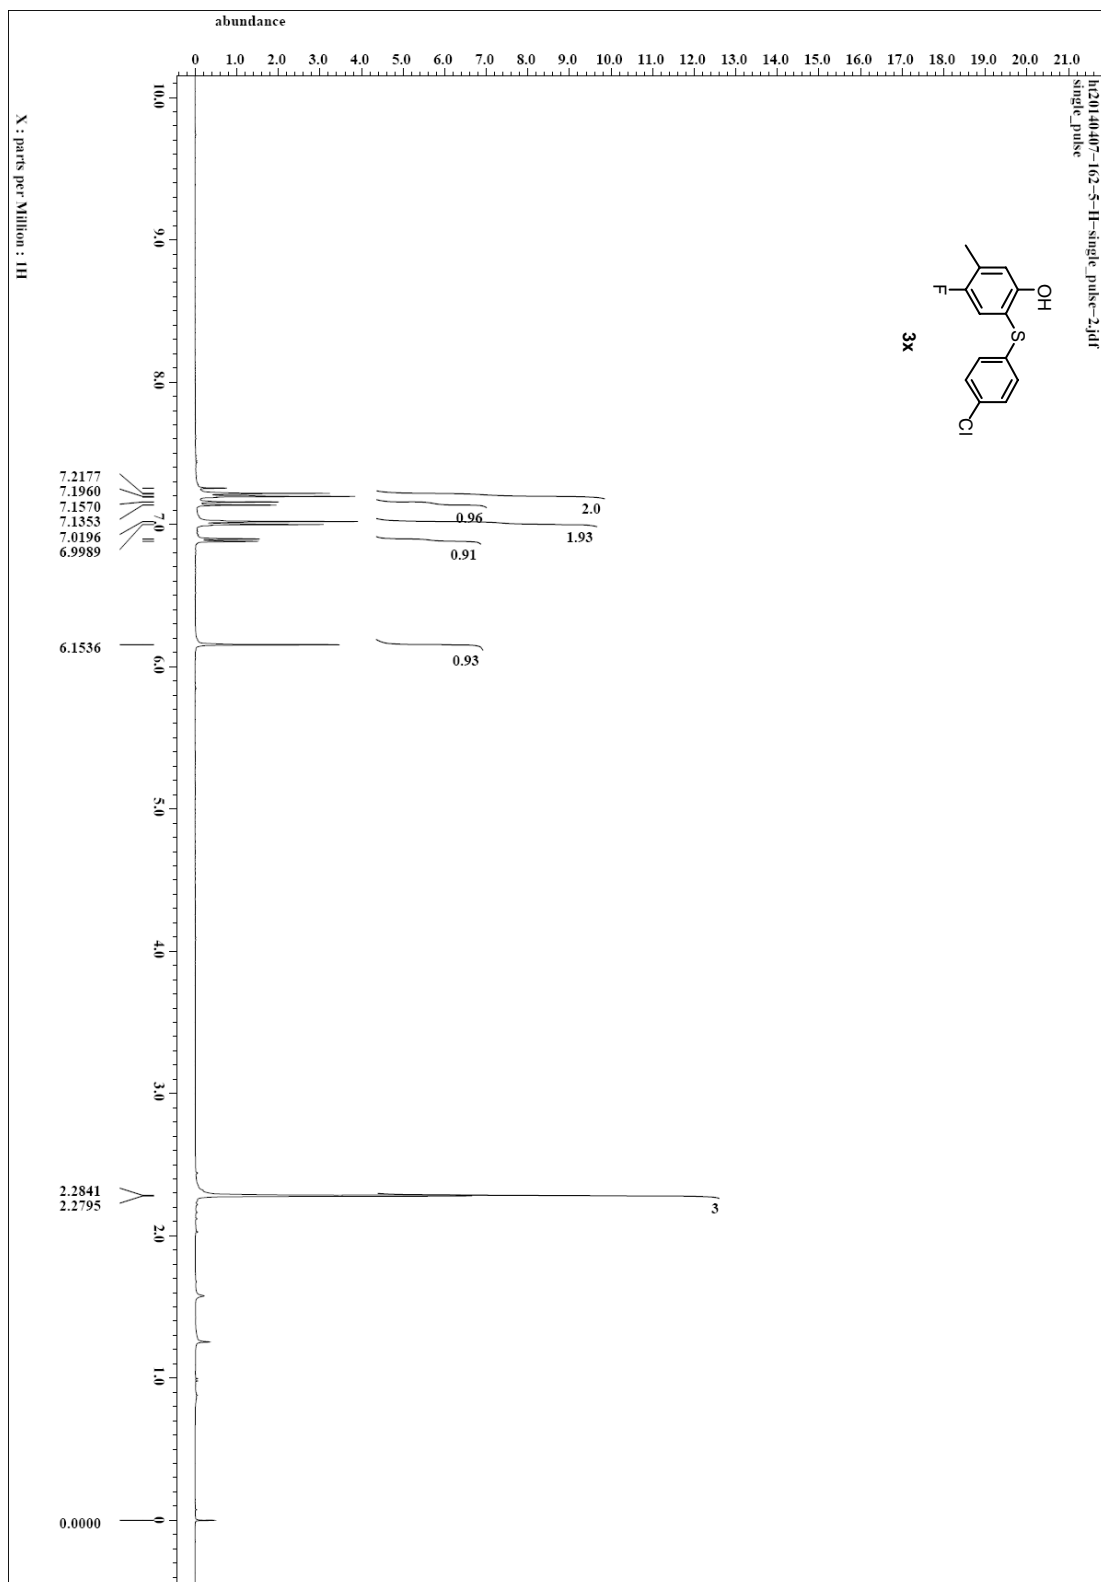

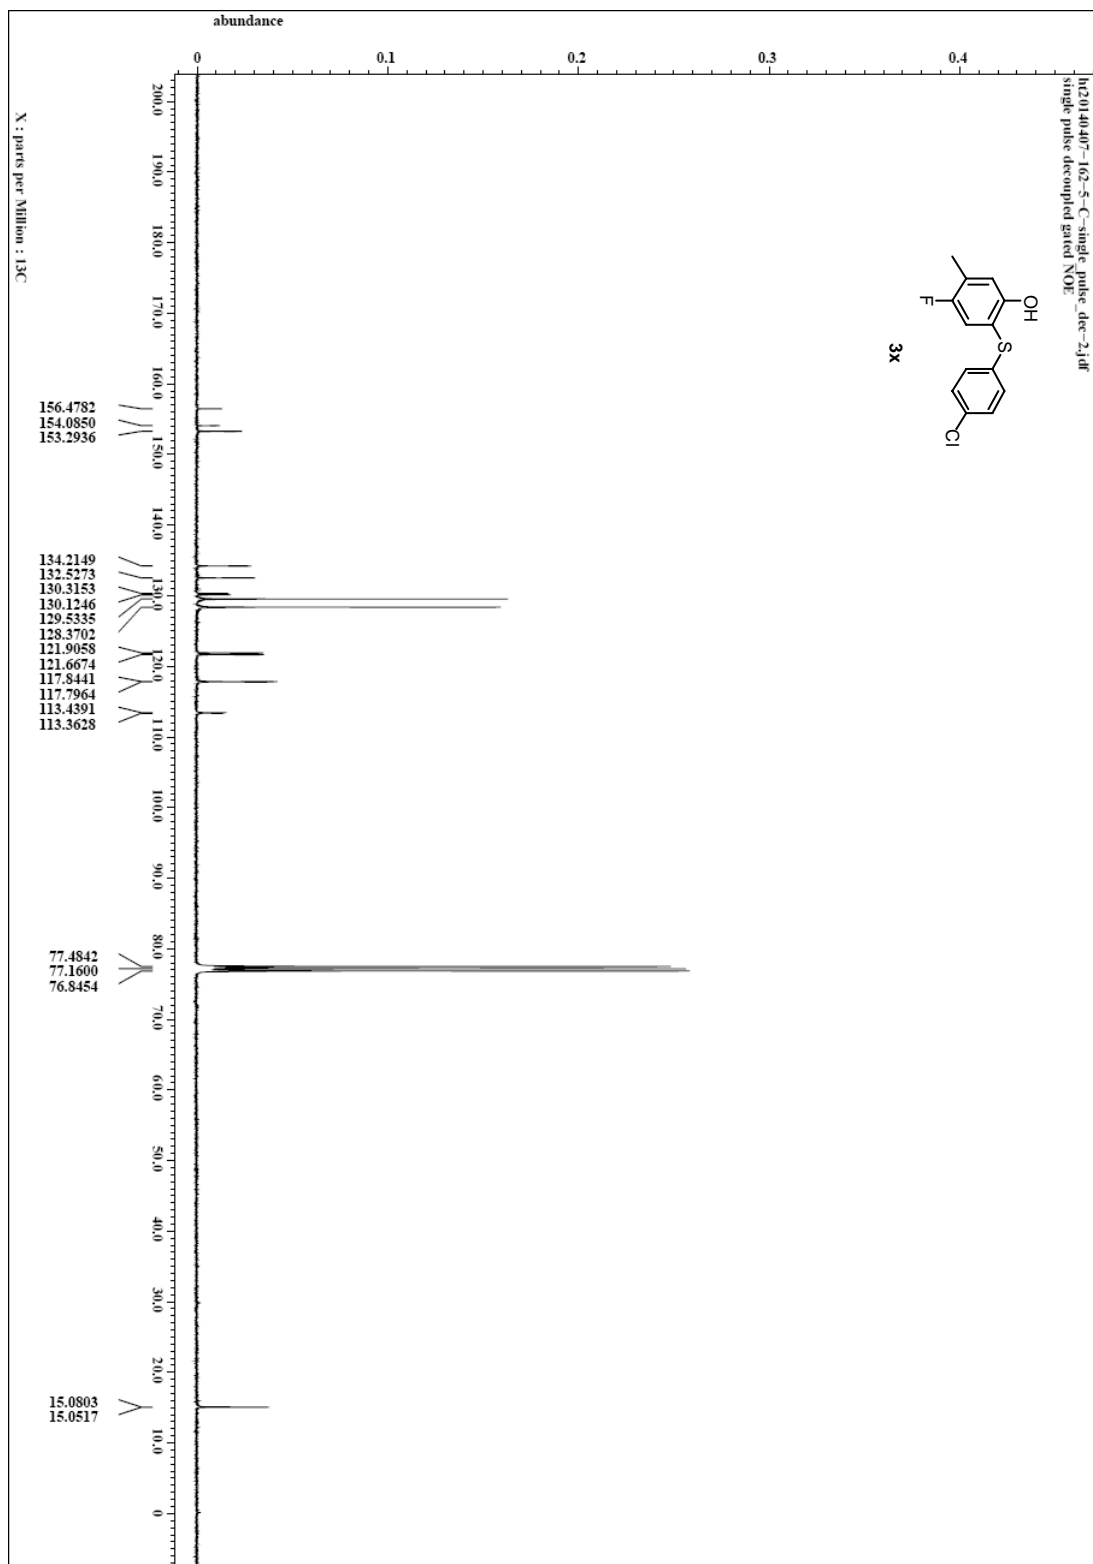

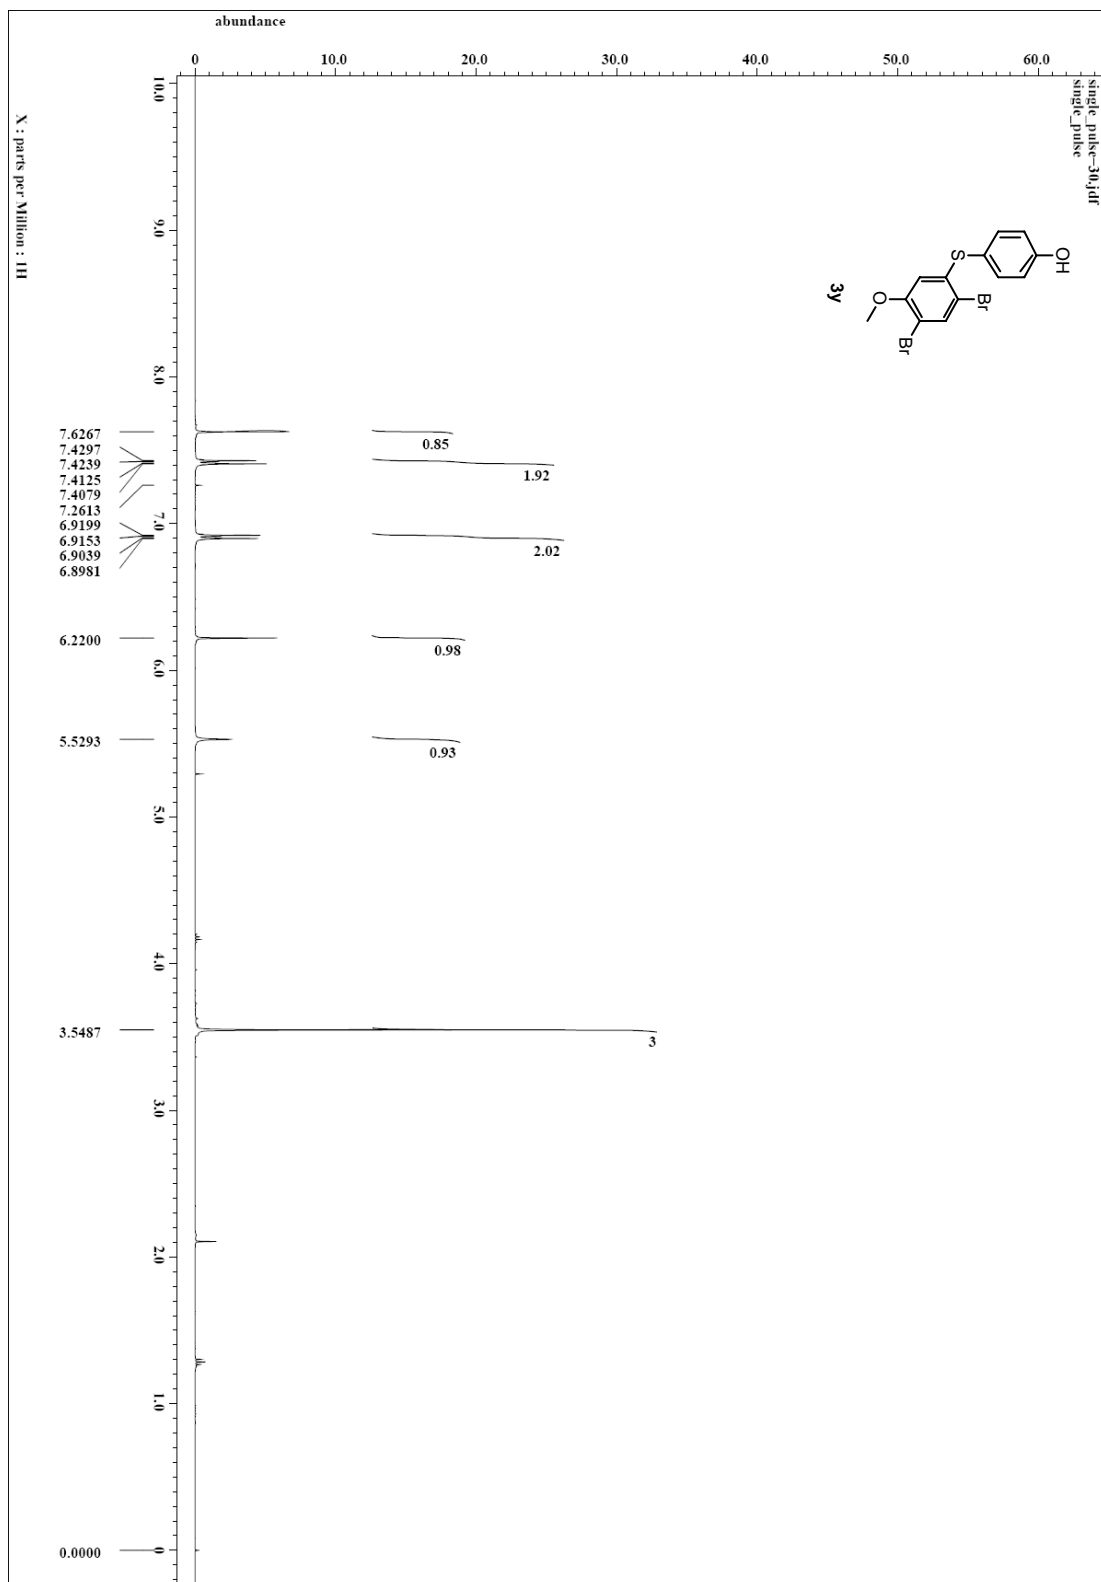



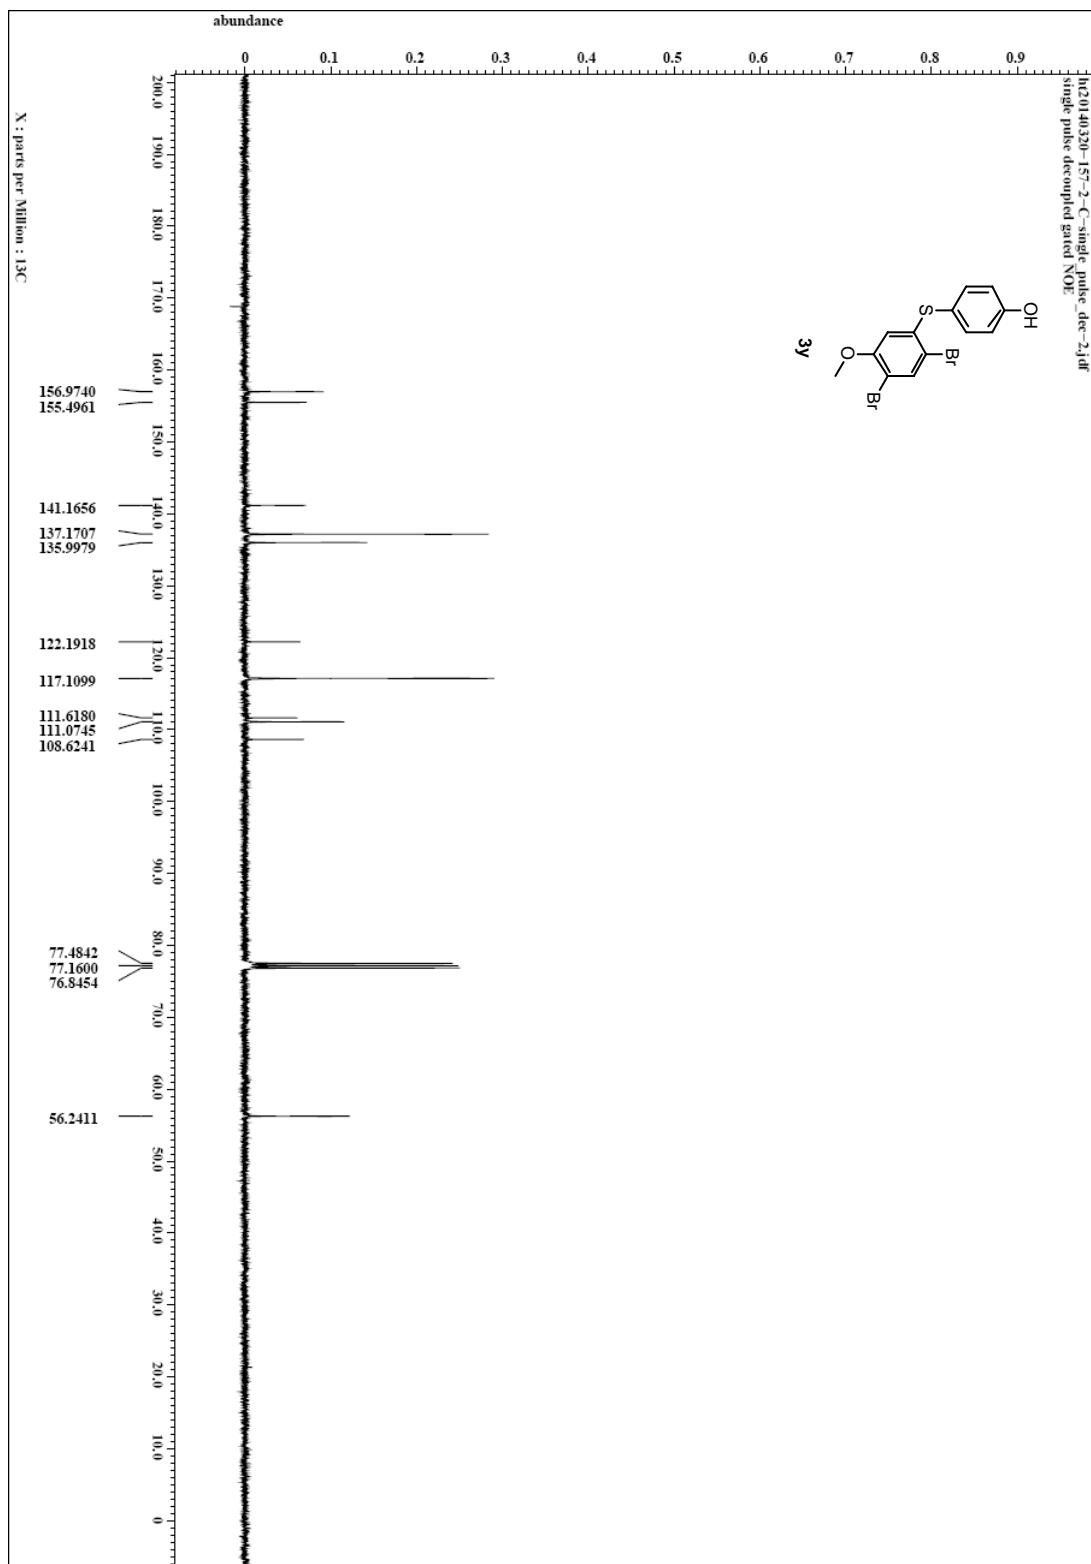

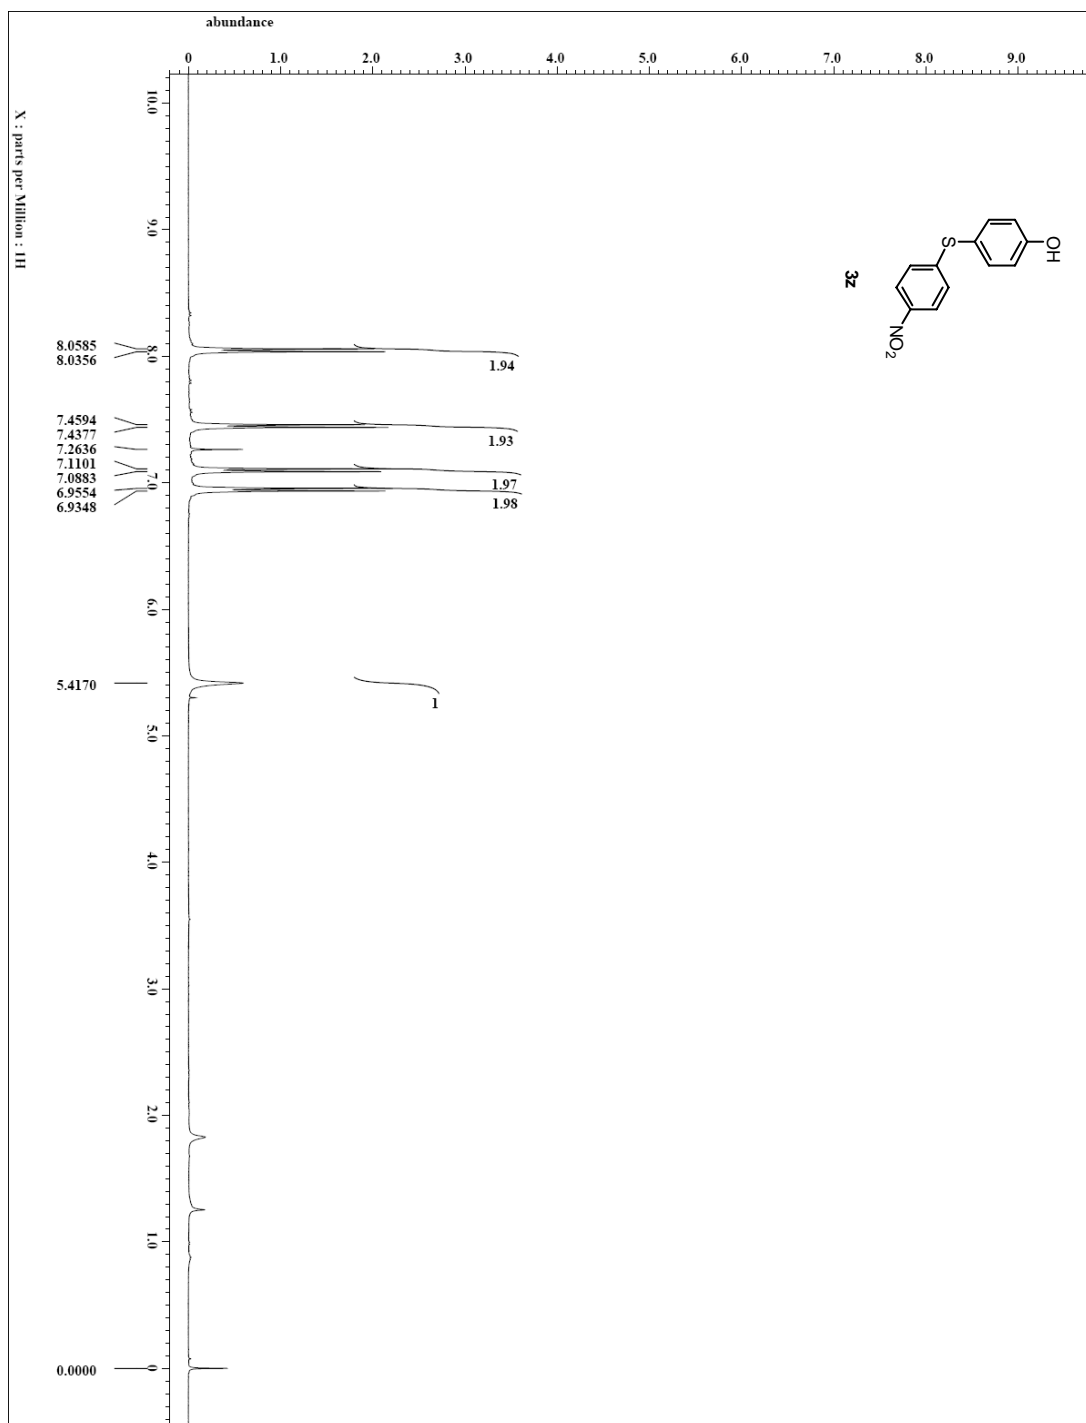

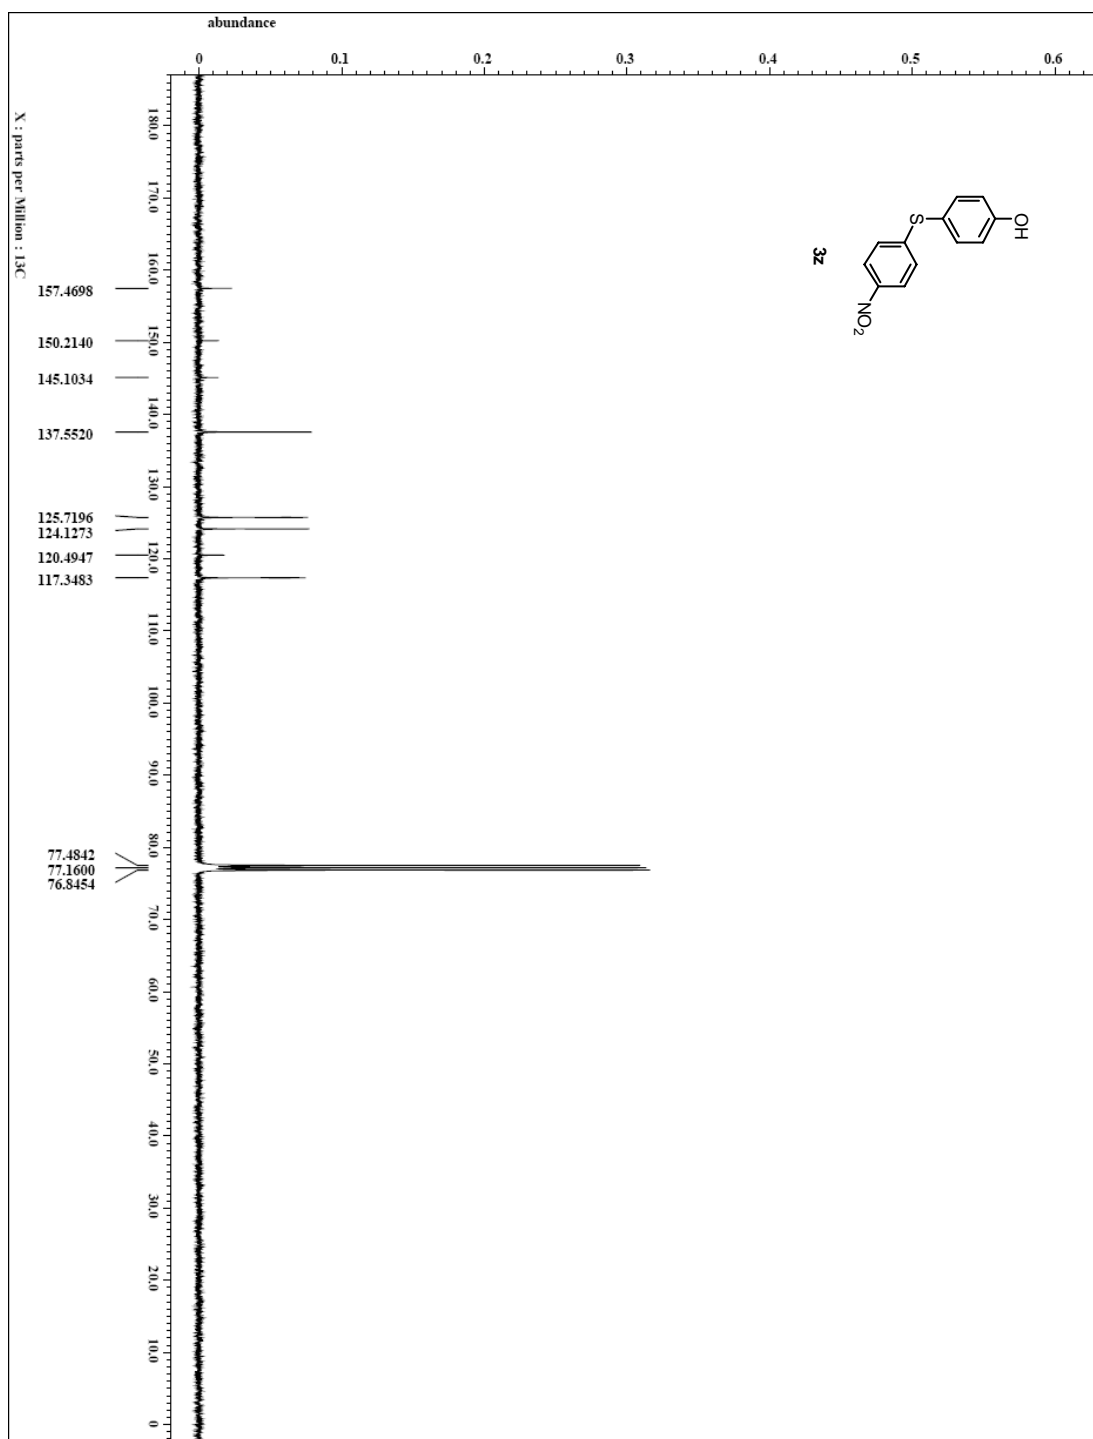

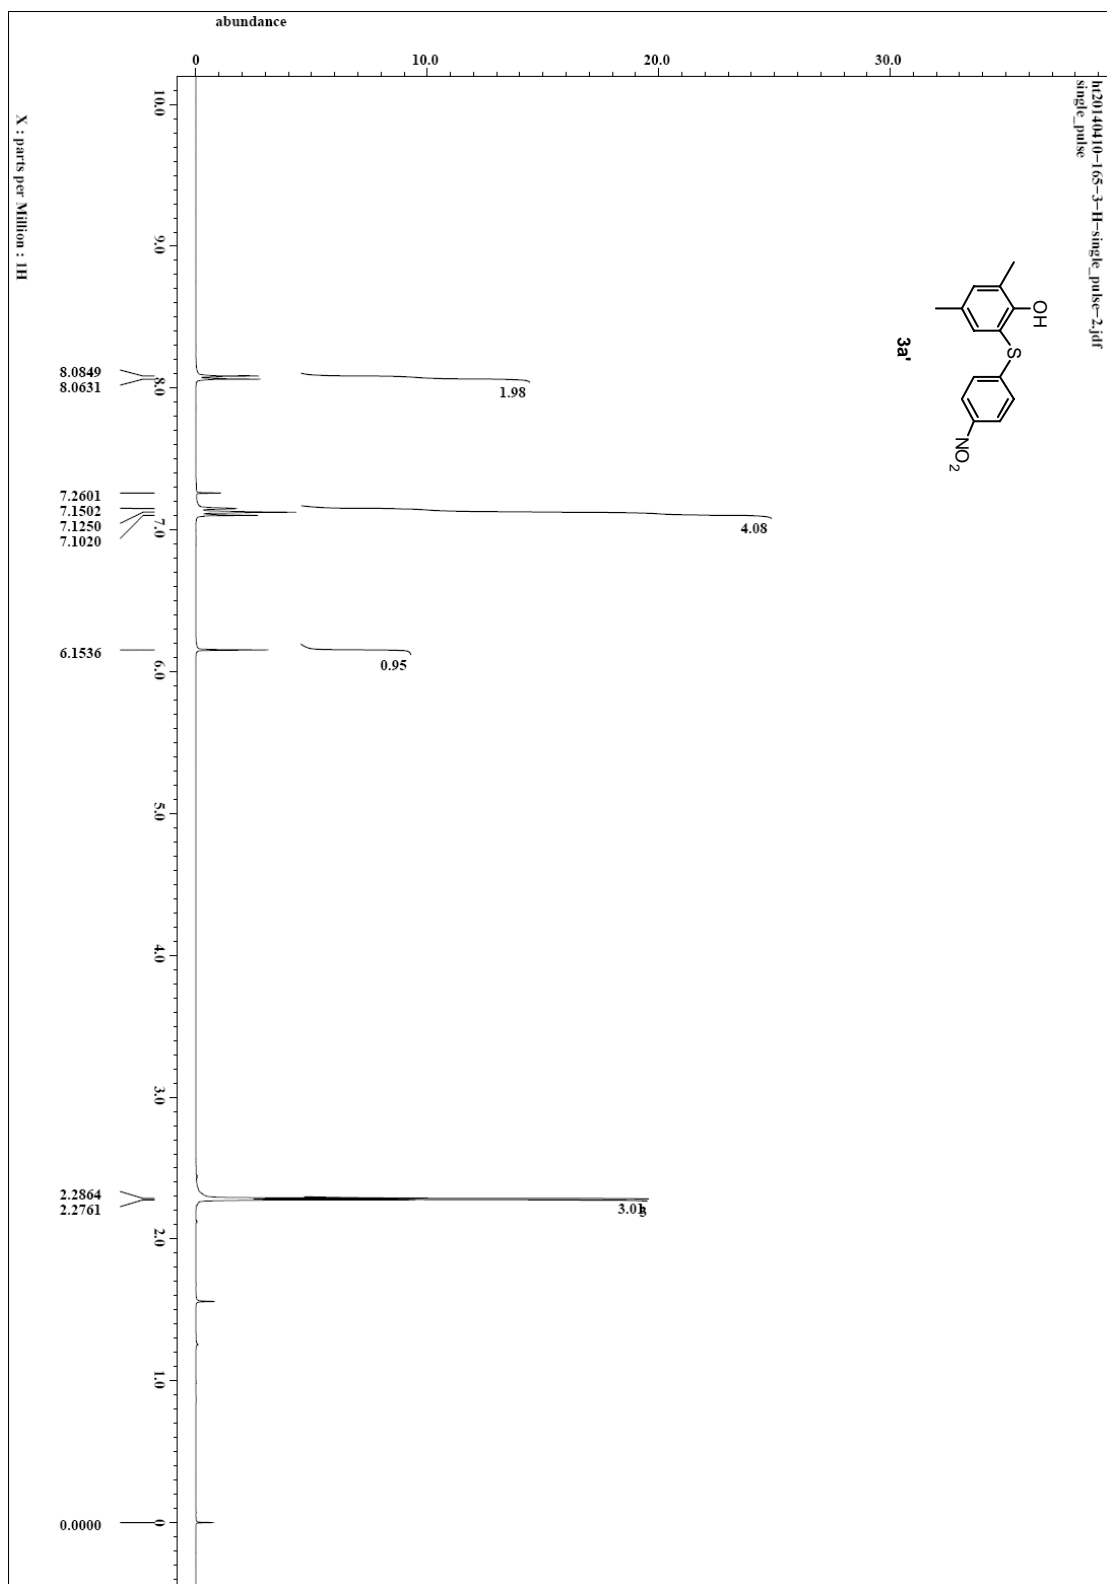

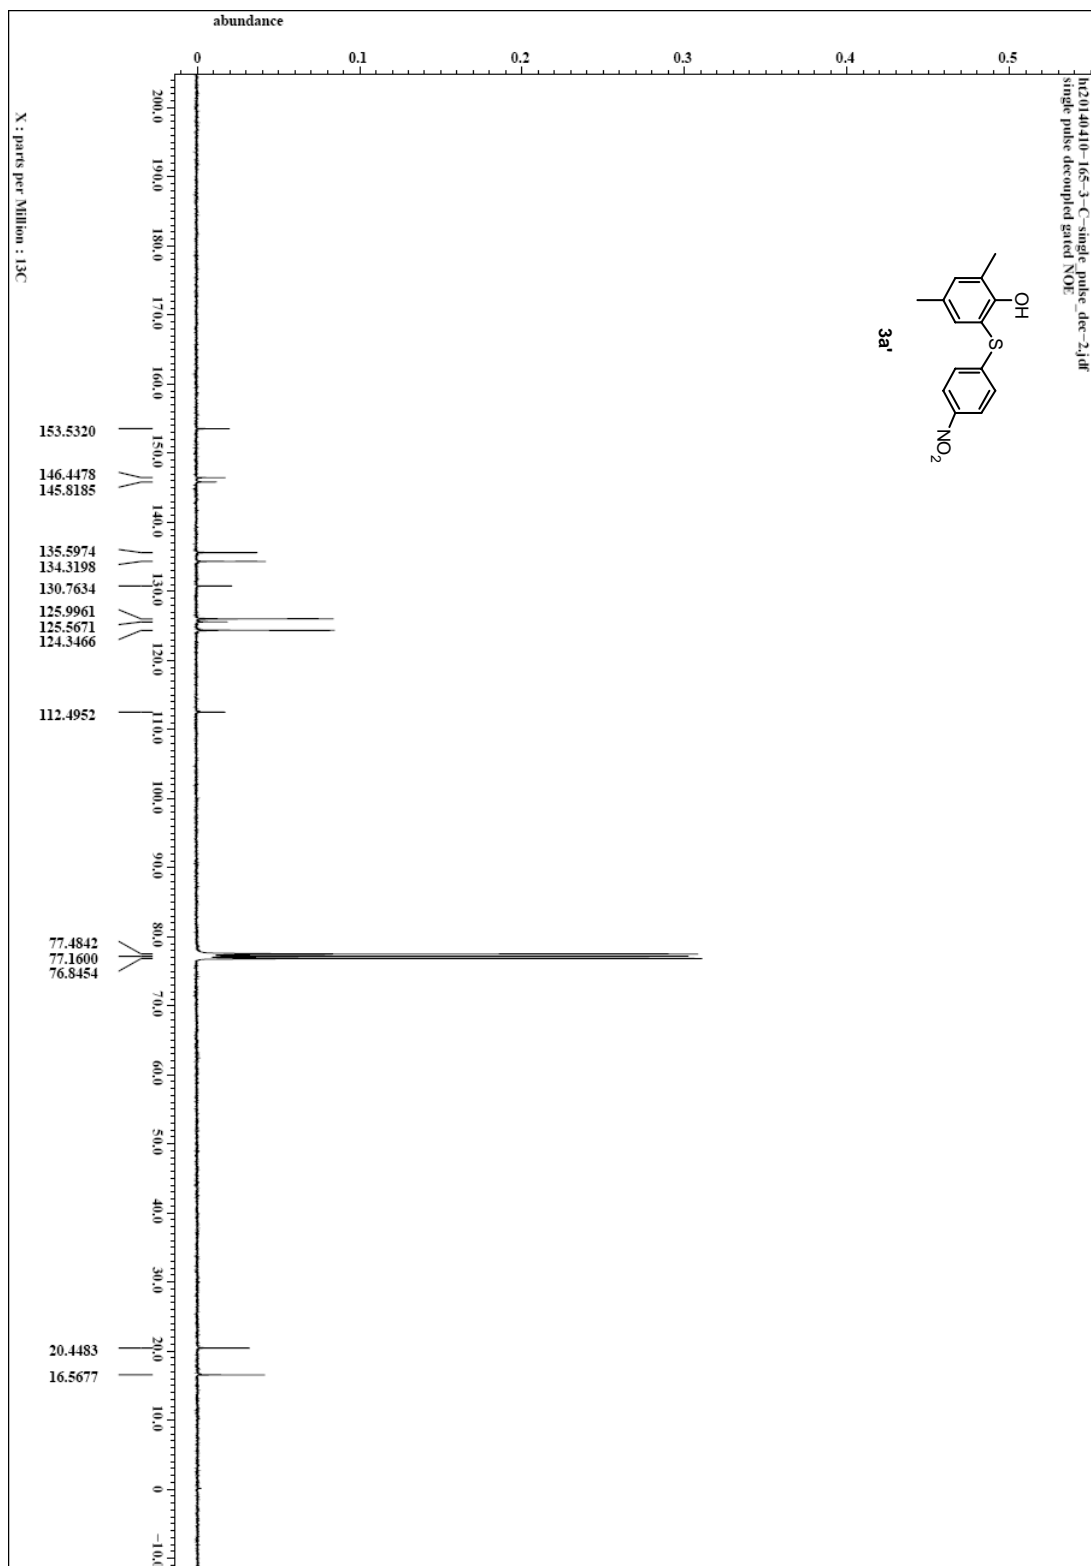

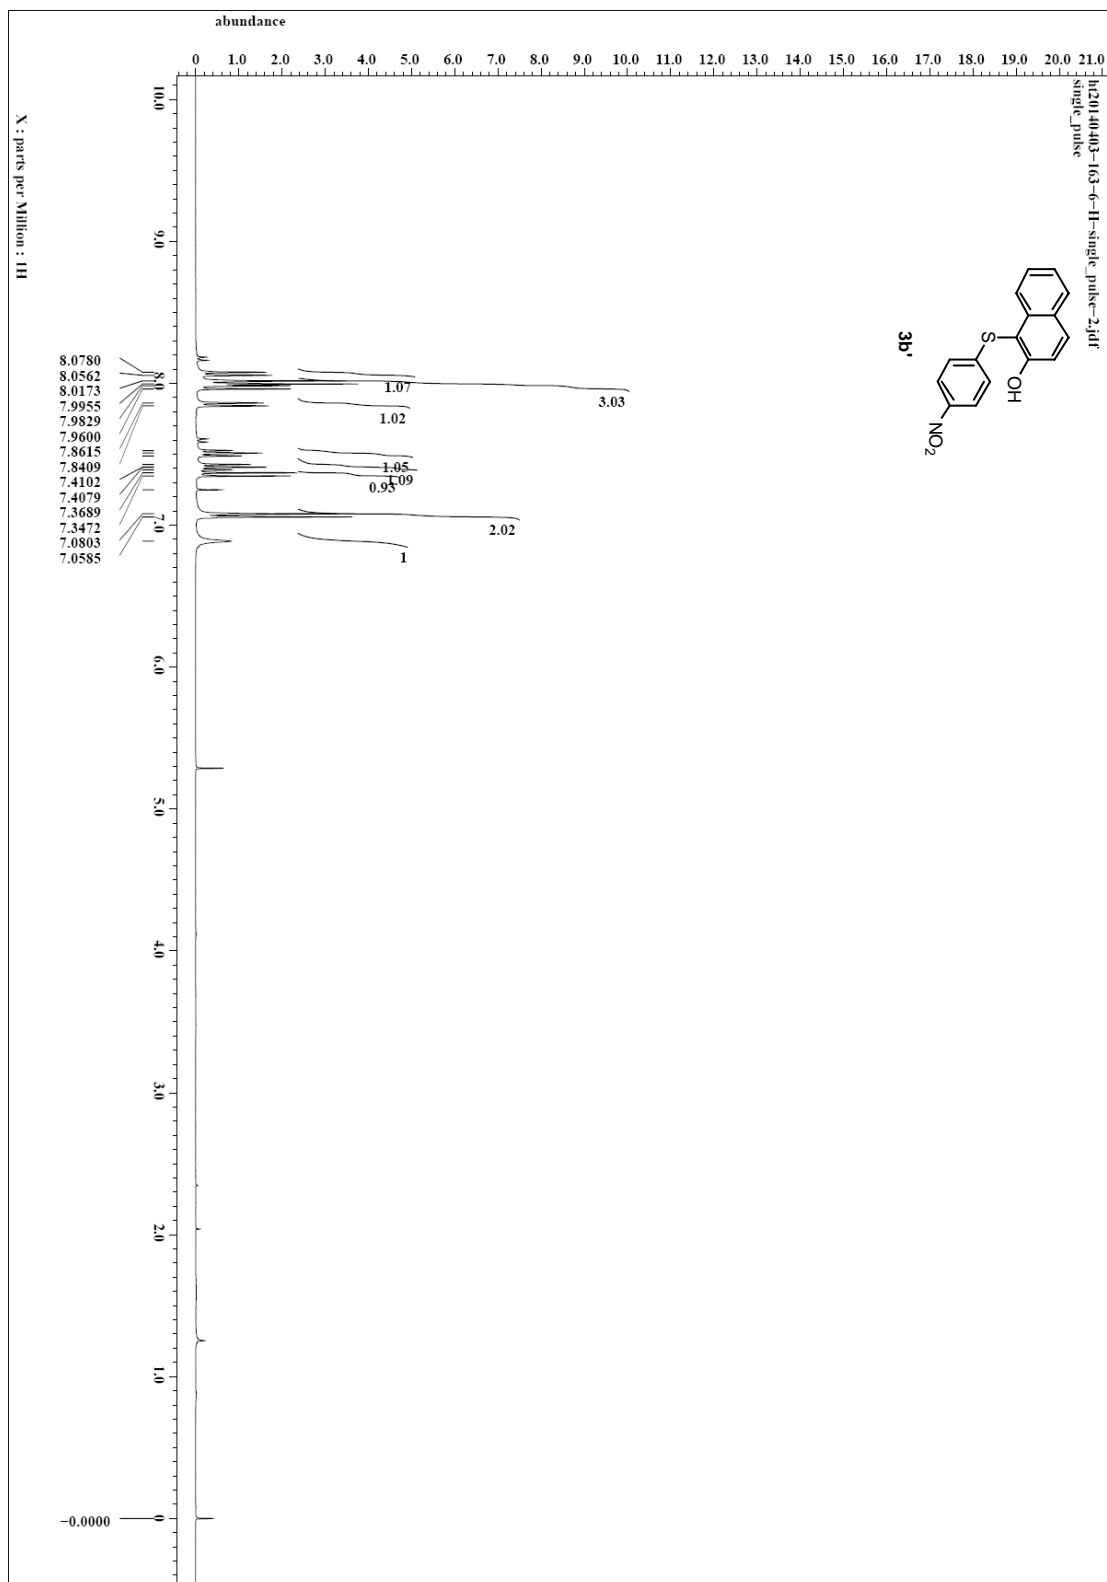

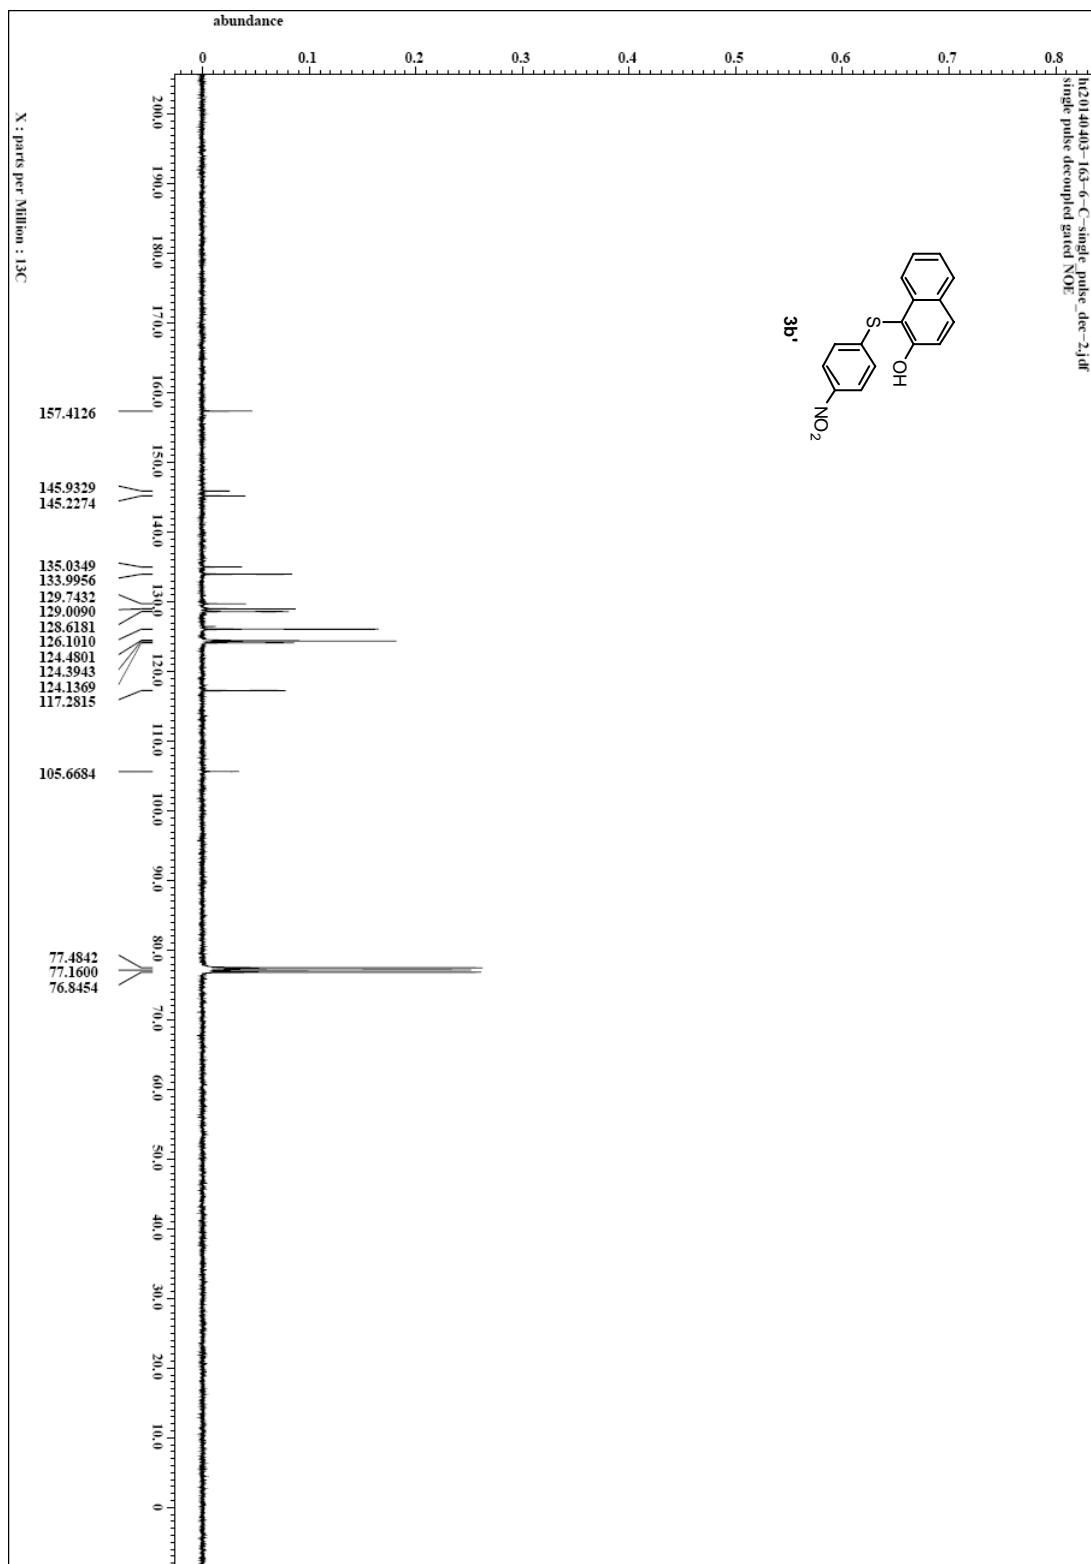

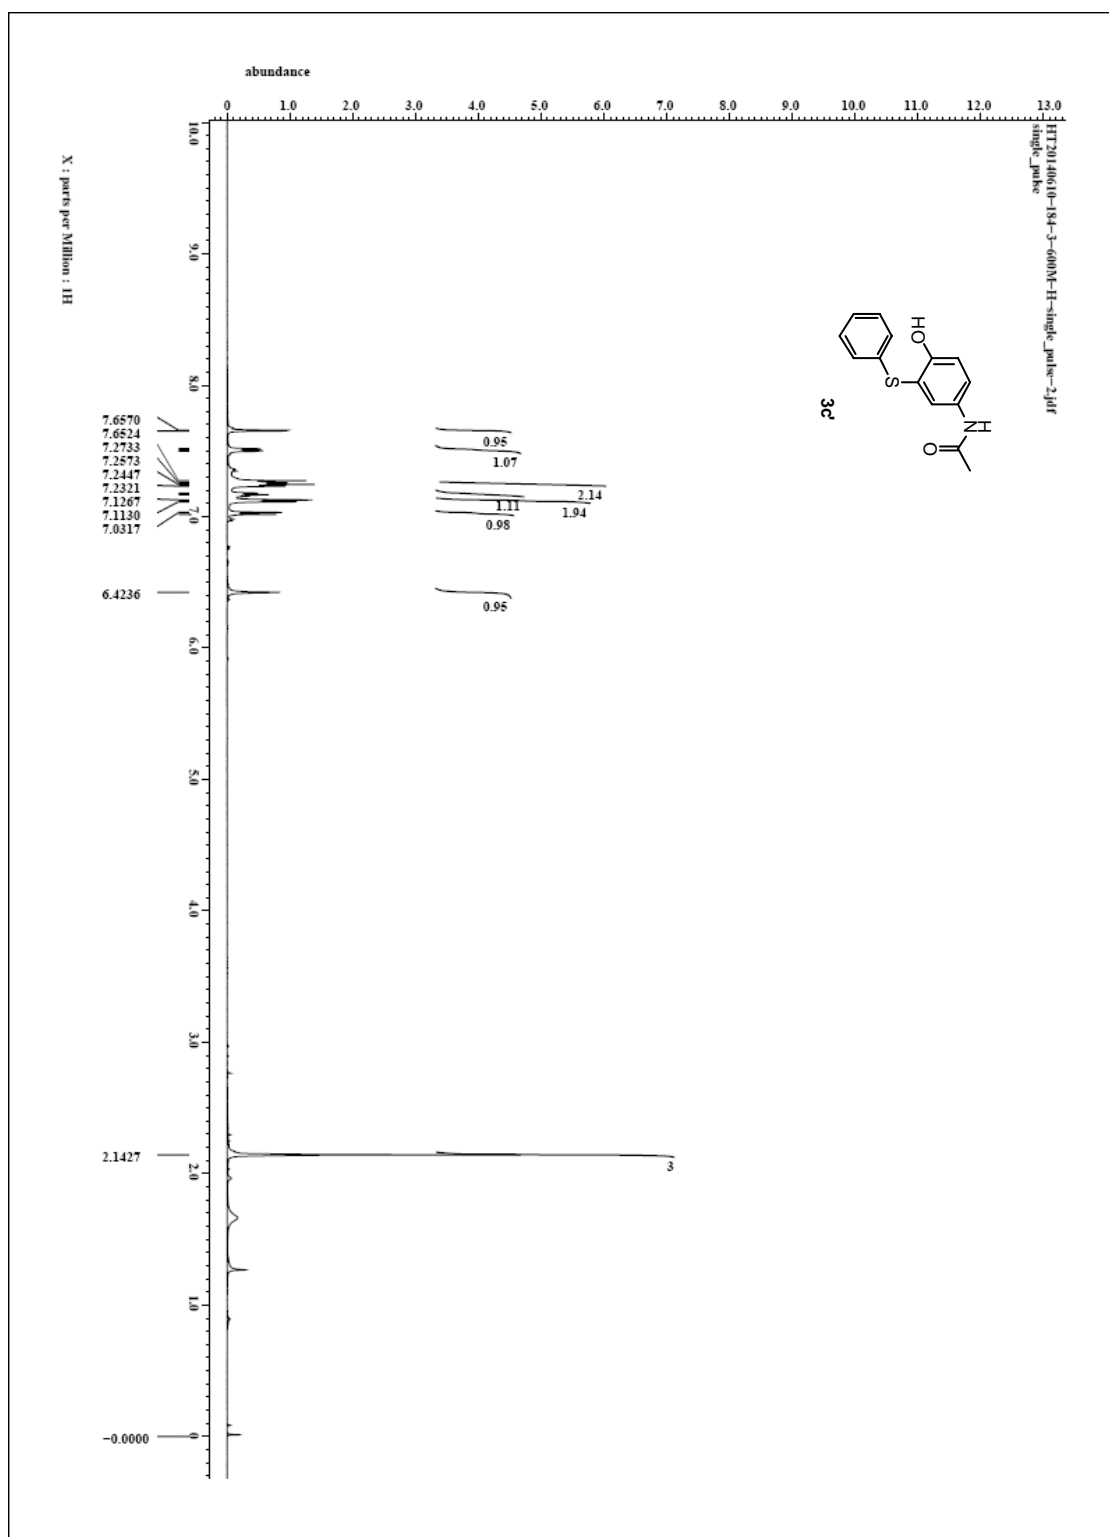



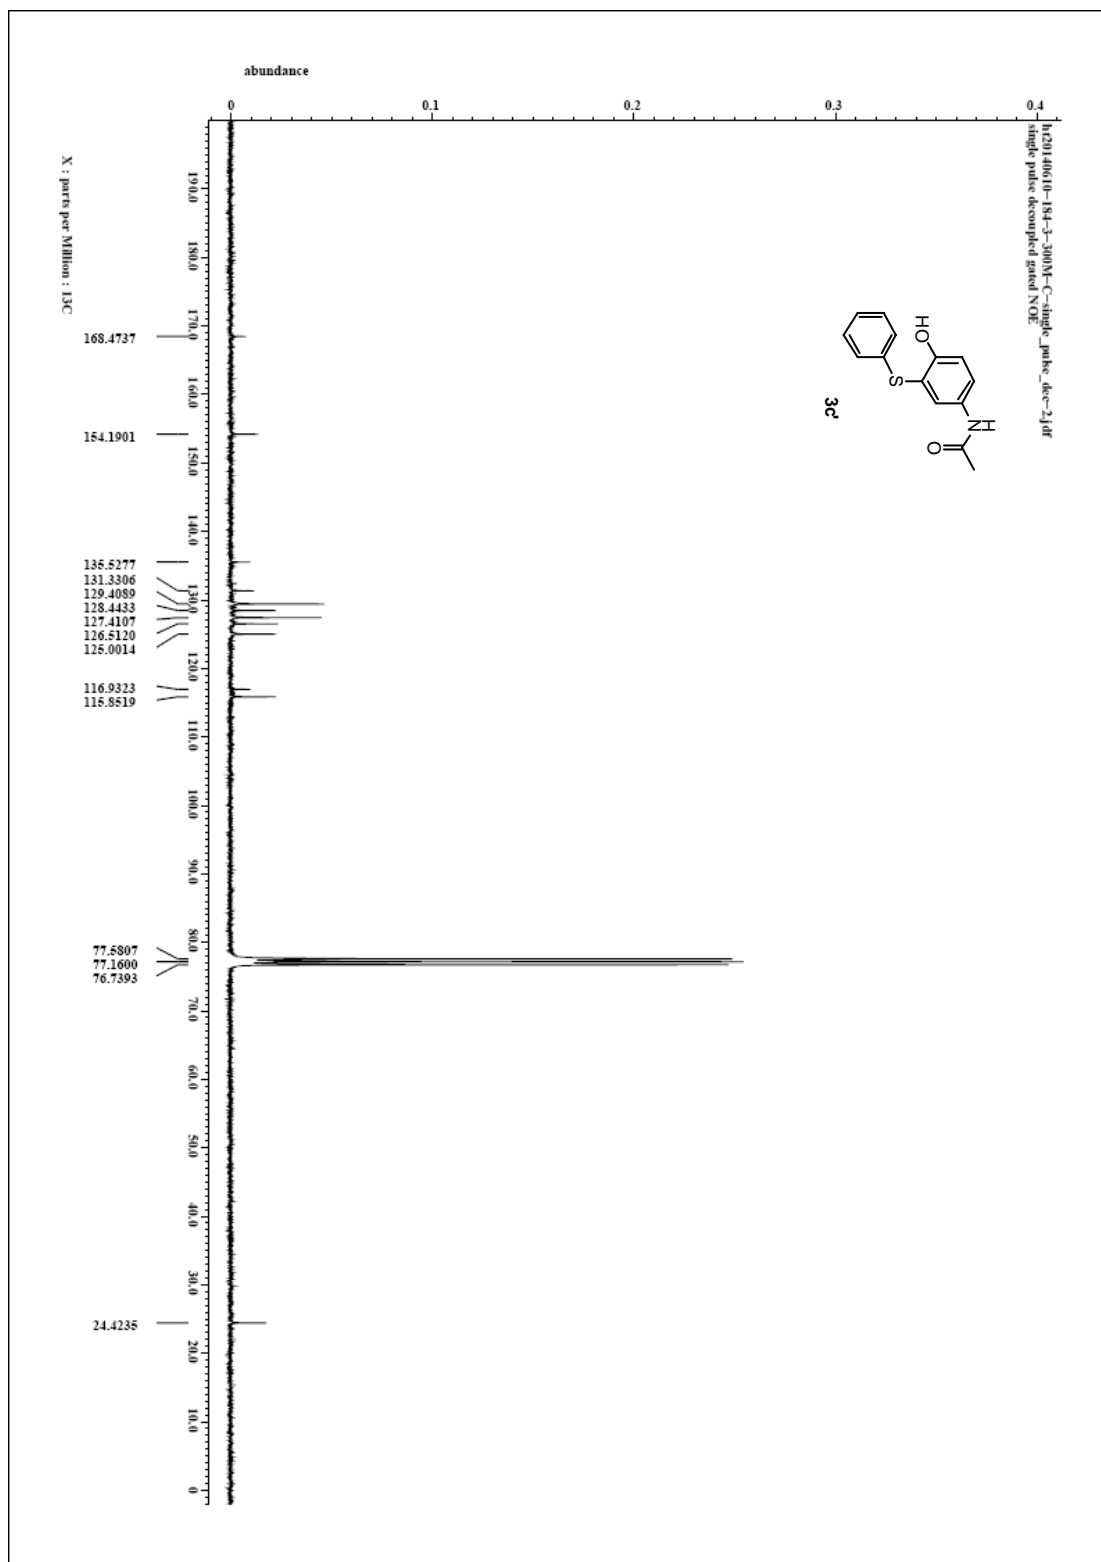

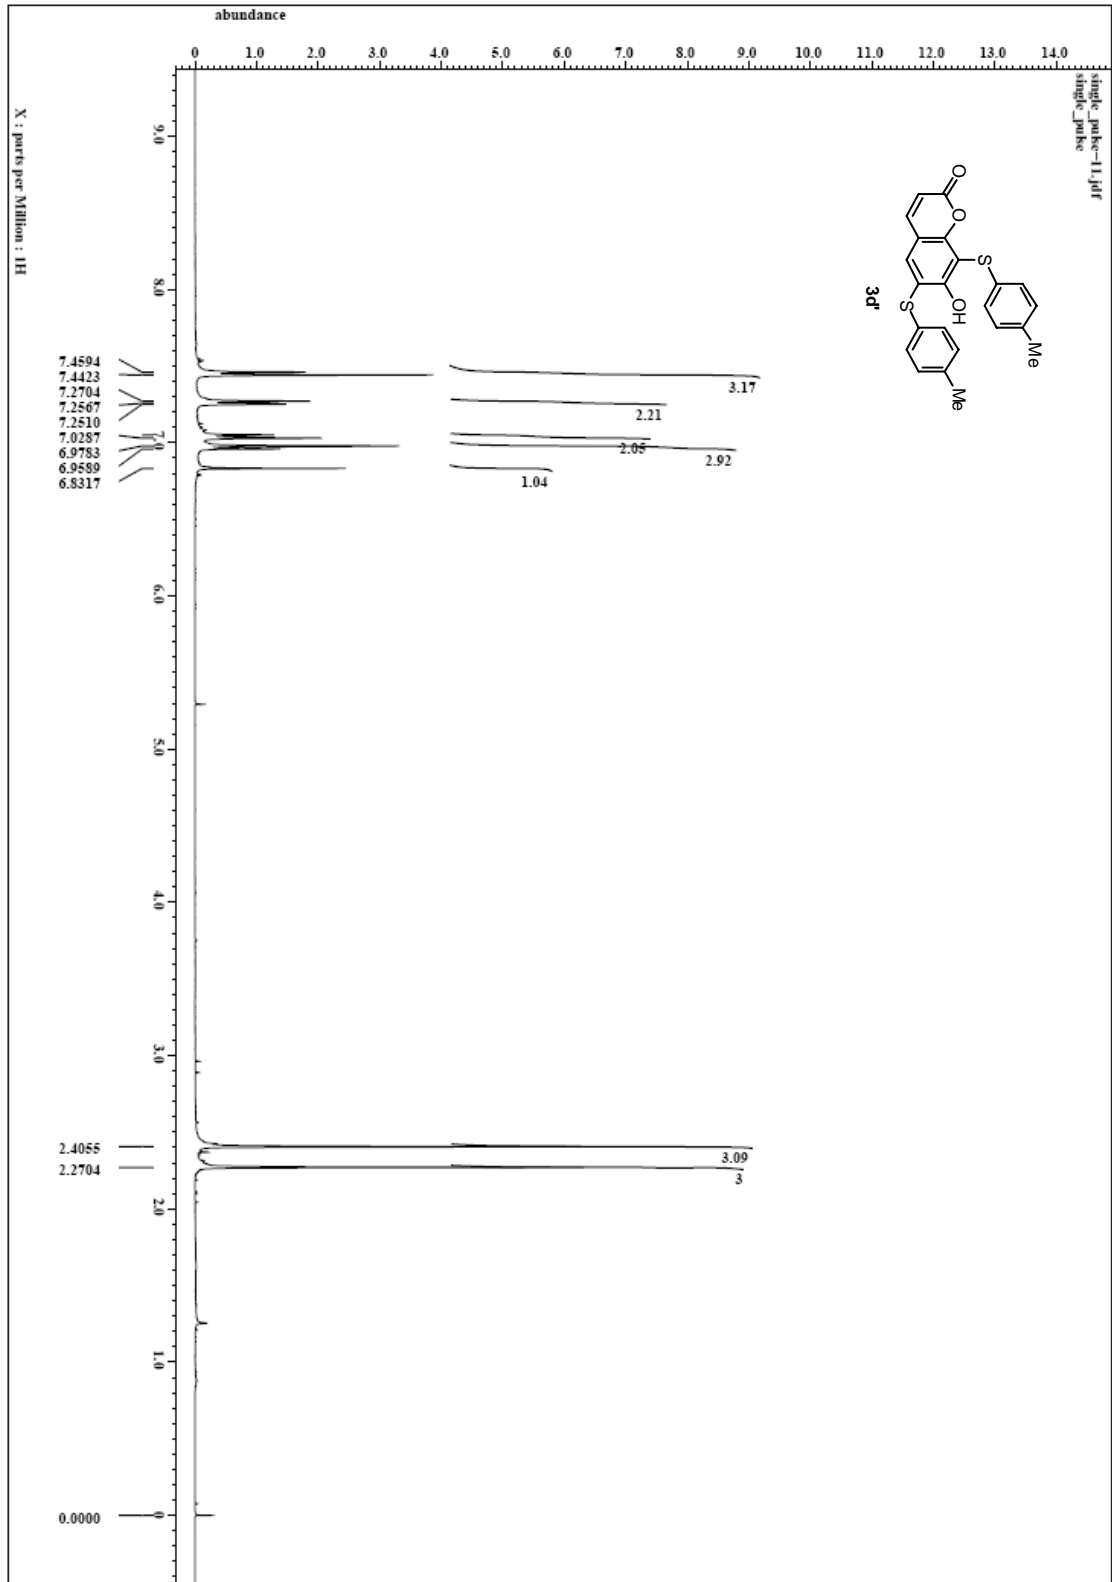

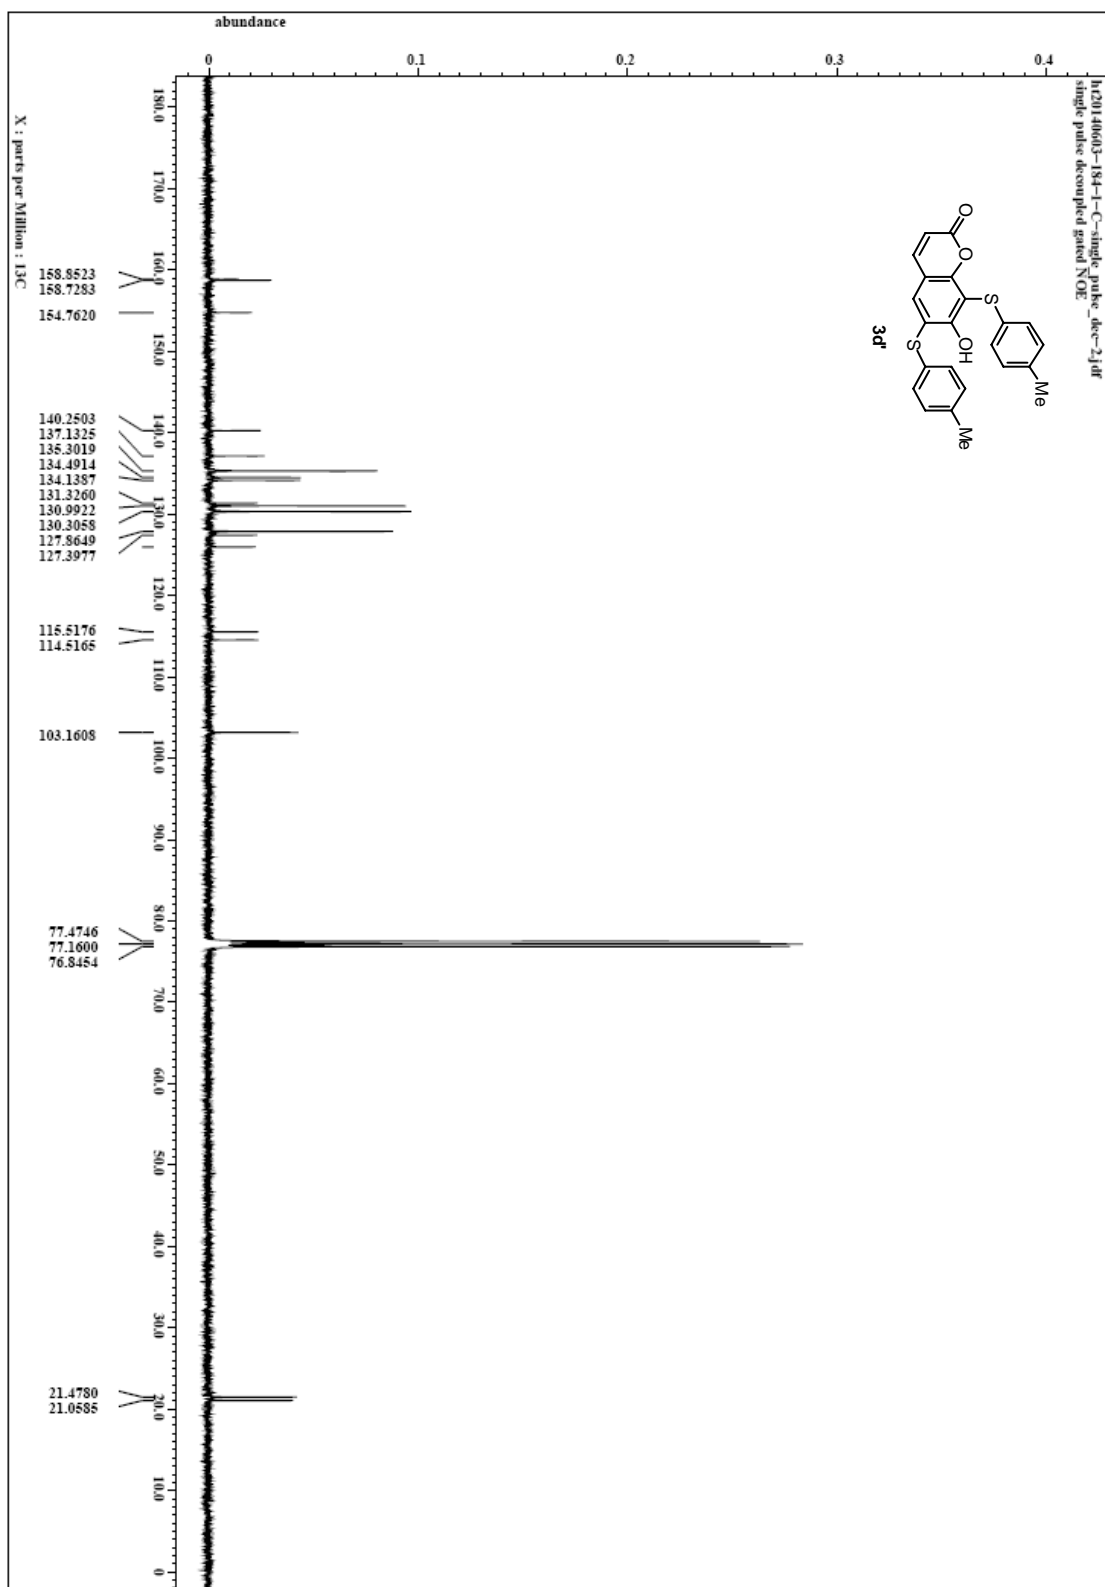

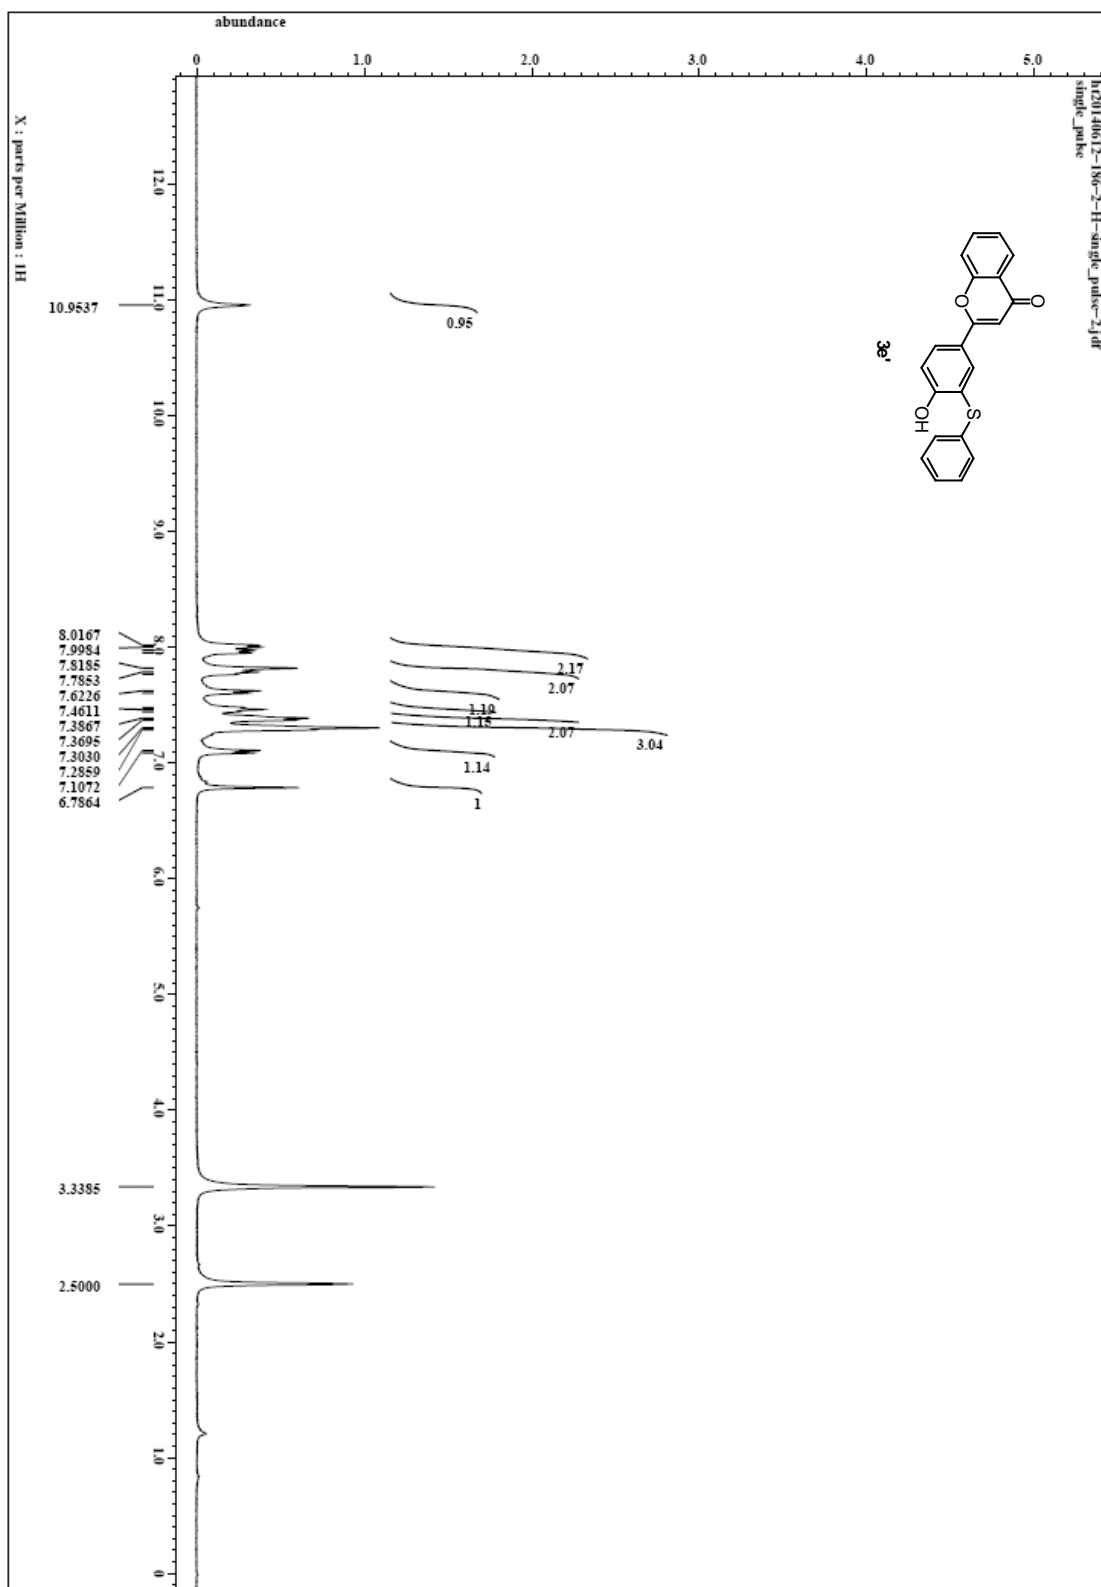

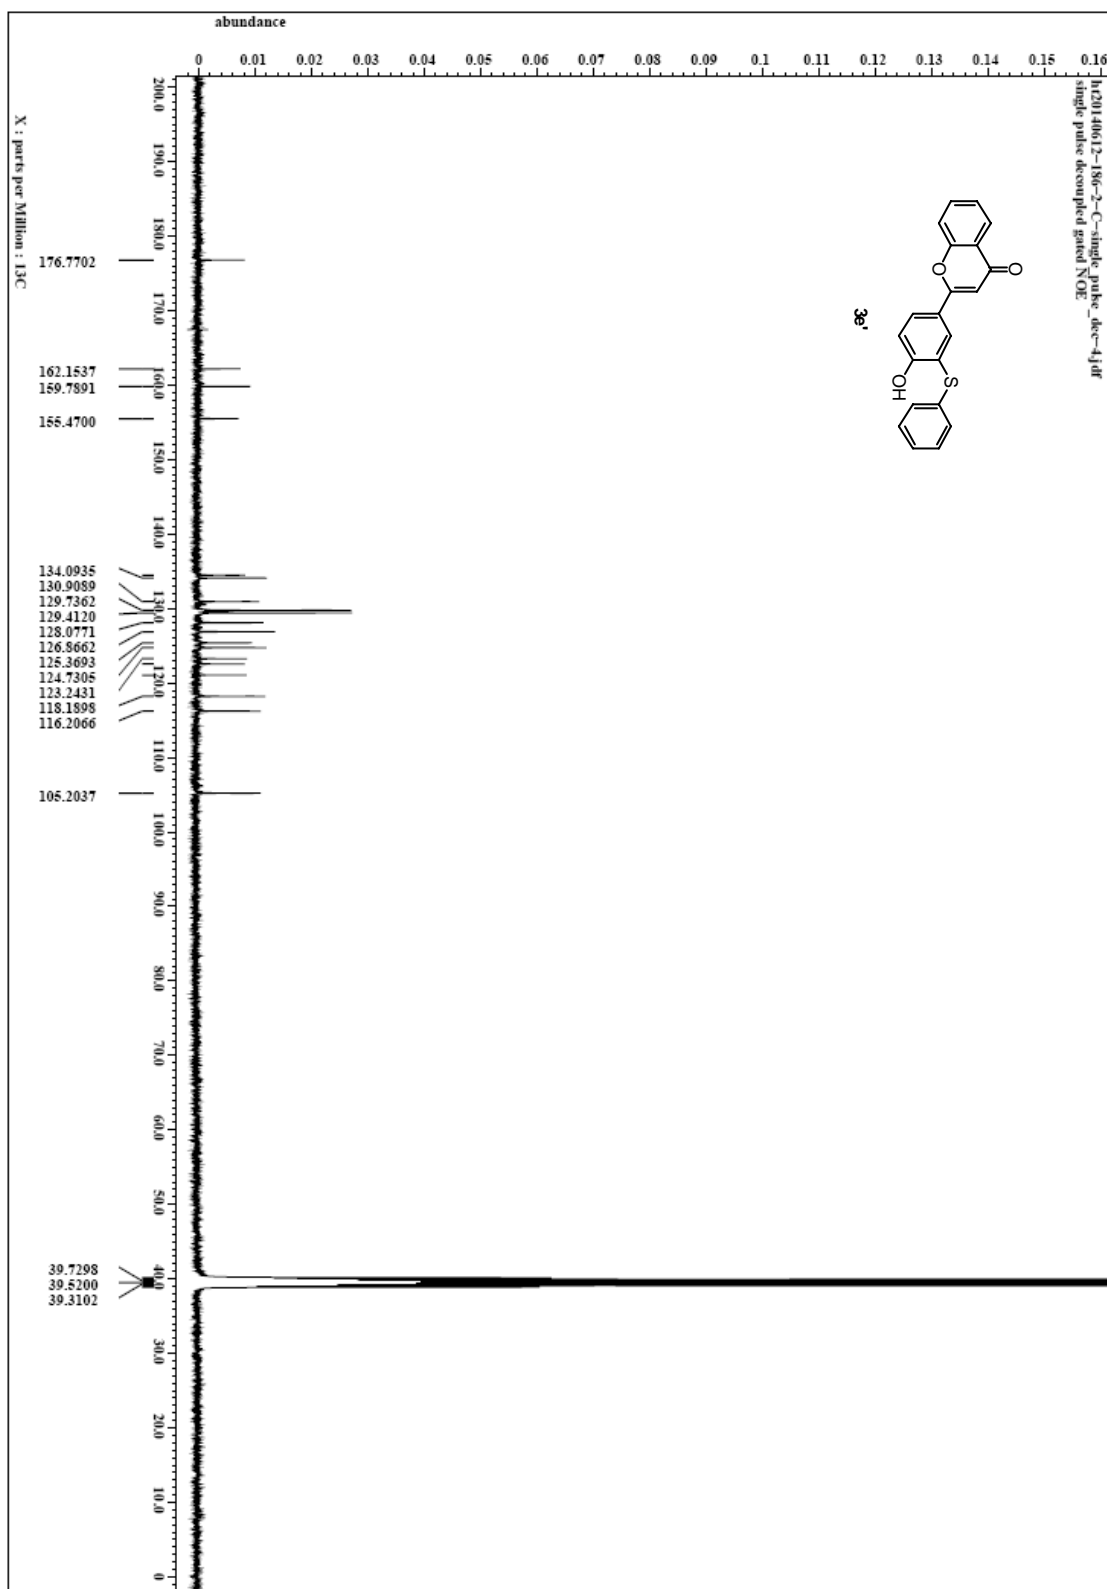

Supplement: c4cc03600j1.pdf [file c4cc03600j1.pdf]
